# Supplementary material for: Linkage to primary care after home-based blood pressure screening in rural KwaZulu-Natal, South Africa: a population-based cohort study
Source: PubMed Central journal article supplement (PMC6286496; doi:10.1136/bmjopen-2018-023369), 2018-12-06
Supplement: bmjopen-2018-023369.draft_revisions.pdf [file bmjopen-2018-023369.draft_revisions.pdf]

# BMJ Open

BMJ Open is committed to open peer review. As part of this commitment we make the peer review history of every article we publish publicly available.

When an article is published we post the peer reviewers' comments and the authors' responses online. We also post the versions of the paper that were used during peer review. These are the versions that the peer review comments apply to.

The versions of the paper that follow are the versions that were submitted during the peer review process. They are not the versions of record or the final published versions. They should not be cited or distributed as the published version of this manuscript.

BMJ Open is an open access journal and the full, final, typeset and author-corrected version of record of the manuscript is available on our site with no access controls, subscription charges or pay-per-view fees (<http://bmjopen.bmj.com>).

If you have any questions on BMJ Open's open peer review process please email [info.bmjopen@bmj.com](mailto:info.bmjopen@bmj.com)

# BMJ Open

## Linkage to primary care after home-based blood pressure screening in rural Kwazulu-Natal: A population-based cohort study

|                               |                                                                                                                                                                                                                                                                                                                                                                                                                                                                                                                                                                                                                                                                                                                                                                                 |
|-------------------------------|---------------------------------------------------------------------------------------------------------------------------------------------------------------------------------------------------------------------------------------------------------------------------------------------------------------------------------------------------------------------------------------------------------------------------------------------------------------------------------------------------------------------------------------------------------------------------------------------------------------------------------------------------------------------------------------------------------------------------------------------------------------------------------|
| Journal:                      | <i>BMJ Open</i>                                                                                                                                                                                                                                                                                                                                                                                                                                                                                                                                                                                                                                                                                                                                                                 |
| Manuscript ID                 | bmjopen-2018-023369                                                                                                                                                                                                                                                                                                                                                                                                                                                                                                                                                                                                                                                                                                                                                             |
| Article Type:                 | Research                                                                                                                                                                                                                                                                                                                                                                                                                                                                                                                                                                                                                                                                                                                                                                        |
| Date Submitted by the Author: | 13-Apr-2018                                                                                                                                                                                                                                                                                                                                                                                                                                                                                                                                                                                                                                                                                                                                                                     |
| Complete List of Authors:     | Siedner, Mark; Massachusetts General Hospital, Medicine; Harvard Medical School,<br>Baisley, Kathy; London School of Hygiene and Tropical Medicine, Epidemiology and Population Health<br>Orne-Gliemann, Joanna; University of Bordeaux<br>Pillay, Deenan; Africa Health Research Institute; University of College London<br>Koole, Olivier; Africa Health Research Institute<br>Wong, Emily; Massachusetts General Hospital<br>Matthews, Philippa; Africa Health Research Institute<br>Tanser, Frank; School of Nursing and Public Health, University of KwaZulu-Natal ; Africa Health Research Institute<br>Herbst, Kobus; Africa Health Research Institute<br>Barnighausen, Till; Africa Health Research Institute<br>Bachmann, Max; UEA, Population Health and Primary Care |
| Keywords:                     | Hypertension < CARDIOLOGY, sub-Saharan Africa, Linkage to care, Population health                                                                                                                                                                                                                                                                                                                                                                                                                                                                                                                                                                                                                                                                                               |
|                               |                                                                                                                                                                                                                                                                                                                                                                                                                                                                                                                                                                                                                                                                                                                                                                                 |

SCHOLARONE™  
Manuscripts

Linkage to primary care after home-based blood pressure screening in rural Kwazulu-Natal: A population-based cohort study

**Authors:**

Mark J. Siedner\*<sup>1,2,3</sup>  
Kathy Baisley<sup>3,4</sup>  
Joanna Orne-Gliemann<sup>5</sup>  
Deenan Pillay<sup>3,6</sup>  
Olivier Koole<sup>3,4</sup>  
Emily Wong<sup>1,2,3</sup>  
Philippa Matthews<sup>3</sup>  
Frank Tanser<sup>3</sup>  
Kobus Herbst<sup>3</sup>  
Till Barnighausen<sup>3,6,7,8</sup>  
Max Bachmann<sup>9</sup>

**\*Corresponding Author for Inquiries:**

Mark J. Siedner  
Massachusetts General Hospital Global Health  
125 Nashua Street  
Boston, MA 02114 USA  
T: +1-617-726-4686; F: +1-617-724-1637  
[msiedner@mgh.harvard.edu](mailto:msiedner@mgh.harvard.edu)

**Affiliations:**

<sup>1</sup>Massachusetts General Hospital, Boston, USA  
<sup>2</sup>Harvard Medical School, Boston, USA  
<sup>3</sup>Africa Health Research Institute, KwaZulu-Natal, SA  
<sup>4</sup>London School of Tropical Medicine and Hygiene, London, UK  
<sup>5</sup>University of Bordeaux, ISPED, INSERM, Bordeaux Population Health Research Center, UMR 1219, Bordeaux, France  
<sup>6</sup>University College London, London, UK  
<sup>7</sup>University of Heidelberg, Germany  
<sup>8</sup>Harvard School of Public Health, Boston, USA  
<sup>9</sup>University of East Anglia, Norwich, UK

**Funding:**

The Africa Health Research Institute receives funding from the United Kingdom Wellcome Trust grant 082384/Z/07/Z. MJS receives funding from the National Institutes of Health (K23 MH099916, P30 30AI060354)

**Conflicts of Interest:** All authors report no conflicts of interest

## ABSTRACT

**Objectives:** The expanding burden of non-communicable diseases (NCDs) globally will require novel public health strategies. Community-based screening has been promoted to augment efficiency of diagnostic services, but few data are available on the downstream impact of such programs. We sought to assess the impact of a home-based blood pressure screening program on linkage to hypertension care in rural South Africa.

**Setting:** We conducted home-based blood pressure screening in a population cohort in rural KwaZulu-Natal, using the WHO STEPS protocol.

**Participants:** Individuals meeting criteria for raised blood pressure (>140 systolic or >90 diastolic averaged over two readings) were referred to local health clinics, and included in this analysis. We defined linkage to care based on self-report of presentation to clinic for hypertension during the next two years of cohort observation. We estimated the population proportion of successful linkage to care with inverse probability sampling weights, and fit multivariable logistic regression models to identify predictors of linkage following a positive hypertension screen.

**Results:** Of 11,694 individuals screened, 15% (n=1,706) were newly diagnosed with elevated pressure. 26.9% (95%CI 24.5-29.4%) of those sought hypertension care in the following two years, and 38.1% (95%CI 35.6-40.7%) did so within five years. Women (aOR 2.41, 95%CI 1.68–3.45), those of older age (aOR 11.49, 95%CI 5.87–22.46, for 45-59 years versus <30), and those unemployed (aOR 1.71, 95%CI 1.10–2.65) were more likely to have linked to care.

**Conclusions:** Linkage to care after home-based identification of elevated blood pressure was rare in rural South Africa, particularly among younger individuals, men, and the employed. Improved understanding of barriers and facilitators to NCD care is needed to improve the effectiveness of blood pressure screening in the region.

### Key Words:

Non-communicable diseases, community health, hypertension, South Africa, linkage to care

### Strengths and Limitations of this Study

- Applies a longitudinal population cohort study design with a large sample size to assess linkage to hypertension care after a home-based screening for elevated blood pressure
- Assesses an under-studied population in rural sub-Saharan Africa who are known to have high prevalence of hypertension and low rates of engagement in hypertension care
- Identifies low rates of linkage to care after home-based blood pressure screening in this population, and key factors associated with poor linkage including male sex, younger age, and being employed
- Limitations include low rates of participation in the home-based screening program and incomplete follow-up, as well as self-reported linkage to care as an outcome definition

*What is already known on this subject?*

1 Hypertension is the risk factor responsible for the greatest number of deaths globally. Yet, awareness and  
2 treatment of the disease remains low, particularly in resource limited settings. Home and community-  
3 based hypertension screenings have gained major traction as a means to improve penetration of disease  
4 diagnosis and prevention. Yet, few studies have assessed their downstream effects on linkage to  
5 hypertension care.  
6  
7

*What this study adds?*

8 We found that less than 3 in 10 people newly notified of elevated blood pressure during a home-based  
9 screening in rural KwaZulu-Natal presented to a clinic for hypertension care within the next two years.  
10 Linkage rates were particularly low in younger people, men and the employed. Consequently, community  
11 and home-based blood pressure screening in similar settings will likely require additional features to result  
12 in their desired effect of improving access to effective hypertensive care.  
13  
14  
15  
16  
17  
18  
19  
20  
21  
22  
23  
24  
25  
26  
27  
28  
29  
30  
31  
32  
33  
34  
35  
36  
37  
38  
39  
40  
41  
42  
43  
44  
45  
46  
47  
48  
49  
50  
51  
52  
53  
54  
55  
56  
57  
58  
59  
60

## 1 BACKGROUND

2 Over two in three deaths worldwide are attributed to non-communicable diseases (NCDs).<sup>1</sup> Although  
3 precise measurement of cause-specific mortality in much of the developing world remains a challenge,  
4 some estimates suggest that the majority of NCD deaths now occur in low and middle-income countries.<sup>2</sup>  
5 In South Africa, for example, the World Health Organization estimates that half of deaths are due to NCDs,  
6 and approximately 25% of the population will suffer a premature death due to them.<sup>3</sup>

7  
8 Consequently, responding to the NCD epidemic in low and middle-income countries is both a major  
9 challenge and stated priority of the public health community.<sup>4</sup> NCD morbidity and mortality can be  
10 substantially reduced through effective primary and secondary prevention measures targeting risk factors  
11 such as smoking, high blood pressure, diabetes, diet and physical activity.<sup>5</sup> Hypertension, which can be  
12 controlled through cost-effective lifestyle and pharmacotherapy interventions, is estimated to account for  
13 over 50% of the population attributable fraction of stroke in the African region.<sup>6</sup> Yet, in South Africa,  
14 national population surveys have estimated that over one quarter of South Africans adults have raised  
15 blood pressure, but only approximately one in three of them has received treatment.<sup>7</sup>

16  
17 The South African Department of Health has outlined strategic NCD goals, which highlight the role for  
18 prevention of NCDs and the importance of a community-based focus.<sup>8</sup> One specific strategy includes  
19 integrating HIV and NCD screening programs and broadening access to diagnostic and treatment in the  
20 community and rural areas. Community-based NCD screening through health fairs and use of community  
21 health workers has gained traction recently as a means to efficiently screen large populations of individuals  
22 for multiple co-morbidities.<sup>9 10</sup> Whether such endeavors lead to successful linking of individuals to  
23 appropriate NCD care is not well established, and is an important question for the field.

24  
25 In 2010, we conducted a home-based assessment of blood pressure in approximately 12,000 people in a  
26 demographic health surveillance (DHS) site in KwaZulu Natal. We referred individuals with raised blood

27 pressure and not already receiving hypertension treatment to local government clinics for repeat  
1 measurement and ongoing hypertension care. We assessed linkage to care during future years of the  
2 measurement and ongoing hypertension care. We assessed linkage to care during future years of the  
3 measurement and ongoing hypertension care. We assessed linkage to care during future years of the  
4 home-based DHS survey. Our primary aims were to determine the probability of clinical engagement  
5 home-based DHS survey. Our primary aims were to determine the probability of clinical engagement  
6 within two years after home-based screening and referral, and to identify predictors of failure to link to  
7 within two years after home-based screening and referral, and to identify predictors of failure to link to  
8 care. Our over-arching aim was to inform public health programmers on the feasibility of community-  
9 care. Our over-arching aim was to inform public health programmers on the feasibility of community-  
10 based blood pressure screening as an entry point into NCD care in this setting.  
11 based blood pressure screening as an entry point into NCD care in this setting.  
12 based blood pressure screening as an entry point into NCD care in this setting.  
13  
14  
15

## 16 34 **METHODS**

### 17 35 *Study design, setting, and participants*

18 36 The African Health Research Institute (AHRI) (formerly the Africa Centre for Health and Population Studies)  
19 36 The African Health Research Institute (AHRI) (formerly the Africa Centre for Health and Population Studies)  
20 36 The African Health Research Institute (AHRI) (formerly the Africa Centre for Health and Population Studies)  
21 36 The African Health Research Institute (AHRI) (formerly the Africa Centre for Health and Population Studies)  
22 36 The African Health Research Institute (AHRI) (formerly the Africa Centre for Health and Population Studies)  
23 37 is a Wellcome Trust funded research institute in South Africa. Since 2000, they have conducted a  
24 37 is a Wellcome Trust funded research institute in South Africa. Since 2000, they have conducted a  
25 37 is a Wellcome Trust funded research institute in South Africa. Since 2000, they have conducted a  
26 38 population cohort study of all adults in a catchment area of 438 km<sup>2</sup> in rural uMkanyakude District,  
27 38 population cohort study of all adults in a catchment area of 438 km<sup>2</sup> in rural uMkanyakude District,  
28 38 population cohort study of all adults in a catchment area of 438 km<sup>2</sup> in rural uMkanyakude District,  
29 39 northern KwaZulu-Natal, covering a total population of approximately 100,000 individuals.<sup>11</sup> Households  
30 39 northern KwaZulu-Natal, covering a total population of approximately 100,000 individuals.<sup>11</sup> Households  
31 39 northern KwaZulu-Natal, covering a total population of approximately 100,000 individuals.<sup>11</sup> Households  
32 40 are surveyed 2–3 times per year, to collect information on birth, deaths and migration patterns for all  
33 40 are surveyed 2–3 times per year, to collect information on birth, deaths and migration patterns for all  
34 40 are surveyed 2–3 times per year, to collect information on birth, deaths and migration patterns for all  
35 41 household members, including non-residents. Since 2003, resident household members ≥15 years have  
36 41 household members, including non-residents. Since 2003, resident household members ≥15 years have  
37 41 household members, including non-residents. Since 2003, resident household members ≥15 years have  
38 42 been invited to participate in an annual home-based individual survey, which collects data on  
39 42 been invited to participate in an annual home-based individual survey, which collects data on  
40 42 been invited to participate in an annual home-based individual survey, which collects data on  
41 43 sociodemographics and general health information.  
42 43 sociodemographics and general health information.  
43 43 sociodemographics and general health information.  
44 43 sociodemographics and general health information.

### 41 45 *Blood pressure screening and referral methods*

44 46 In 2010, all individuals who participated in the home-based survey were also offered a physical  
45 46 In 2010, all individuals who participated in the home-based survey were also offered a physical  
46 46 In 2010, all individuals who participated in the home-based survey were also offered a physical  
47 47 examination to determine weight, height and blood pressure, using the WHO STEPS protocol.<sup>12</sup> Blood  
48 47 examination to determine weight, height and blood pressure, using the WHO STEPS protocol.<sup>12</sup> Blood  
49 48 pressure was measured using Omron automated blood pressure monitors (Omron Global, Kyoto Japan).  
50 48 pressure was measured using Omron automated blood pressure monitors (Omron Global, Kyoto Japan).  
51 49 Blood pressure was measured after 15 minutes of resting in a seated position. We collected three  
52 49 Blood pressure was measured after 15 minutes of resting in a seated position. We collected three  
53 50 measurements, each five minutes apart, with the mean of the last two measurements used to identify  
54 50 measurements, each five minutes apart, with the mean of the last two measurements used to identify  
55 51 those with elevated blood pressure. A positive hypertension screen was defined as a mean systolic blood  
56 51 those with elevated blood pressure. A positive hypertension screen was defined as a mean systolic blood  
57 52 pressure ≥140 mmHg and/or diastolic blood pressure ≥90 mmHg.<sup>13</sup> Individuals with a positive screen and  
58 52 pressure ≥140 mmHg and/or diastolic blood pressure ≥90 mmHg.<sup>13</sup> Individuals with a positive screen and  
59 52 pressure ≥140 mmHg and/or diastolic blood pressure ≥90 mmHg.<sup>13</sup> Individuals with a positive screen and  
60 52 pressure ≥140 mmHg and/or diastolic blood pressure ≥90 mmHg.<sup>13</sup> Individuals with a positive screen and

53 not already receiving treatment were referred to their preferred local public health clinic with their  
54 screening results.

55

### 56 *Outcome assessment*

57 For our primary outcome of interest, we defined successful linkage to care for hypertension as self-  
58 reported linkage within two years of a positive home-based hypertension screen. To assess this outcome,  
59 we used data from the two subsequent, annual home-based health surveys in 2011 and 2012. In each  
60 annual health survey, respondents were asked if: 1) they have been diagnosed with hypertension in the  
61 past 12 months; 2) if they have ever received hypertension treatment; and 3) if they are currently being  
62 treated for hypertension. We defined successful linkage to care by a positive response to any of these  
63 three questions in either 2011 or 2012. As secondary outcomes of interest, we also examined 1) linkage to  
64 hypertension care within five years (as opposed to two), defined as a positive response to any of the same  
65 three questions in the annual health surveys during 2011-2015 and 2) confirmation of hypertension care  
66 seven years after the screening, as evidenced by clinical records from all public health clinics in the  
67 catchment area in 2017, the first year linked clinical data was linked to the population cohort database.

68

### 69 *Statistical methods*

70 We included in this analysis individuals who had a positive hypertension screen in the home-based 2010  
71 survey, and who reported no previous diagnosis of hypertension or hypertension treatment. We first  
72 summarized sociodemographic characteristics of eligible adults who had blood pressure measurements in  
73 the 2010 survey. We then estimated population-level prevalence of linkage to hypertension care in the  
74 two years after the screening program, both overall and stratified by sex and age, with the use of inverse  
75 probability weights (IPWs) of the probability of participating in the hypertension screening. We used IPWs  
76 to make the results generalizable to the entire 2010 sample. To calculate the weights, we fit a logistic  
77 regression model with completion of blood pressure screening in 2010 as the outcome of interest and



78 included age strata, sex, education level and place of residence (urban, peri-urban, or rural) as predictors,  
79 based on information routinely collected in the household-level survey.

80  
81 We then fit logistic regression models to estimate odds ratios (OR) and 95% confidence intervals (CI) for  
82 factors independently associated with linkage to hypertension care within two years of a positive home-  
83 based hypertension screen. Potential determinants of linkage were examined at three levels:  
84 sociodemographic factors (age, sex, educational attainment, employment status and socioeconomic  
85 status); geographical factors (distance from clinic, urban versus rural residency); and clinical factors (body  
86 mass index, elevated blood pressure severity [defined using hypertension stages as a) stage I: systolic 140-  
87 160 and diastolic 80-100; b) stage II: systolic 160-<180 or diastolic 100-<120; or c) hypertensive urgency:  
88 systolic >180 or diastolic >120], self-report of diabetes, self-report of tuberculosis)<sup>14</sup>. Sociodemographic  
89 and clinical factors whose age- and sex-adjusted association with linkage was significant at  $p < 0.10$  were  
90 included in a final adjusted multivariable model. Distance from the nearest clinic was analyzed as a  
91 continuous covariate. In order to allow for non-linear relationships between distance and linkage to care,  
92 we used fractional polynomial functions.<sup>15</sup>

93  
94 We tested the robustness of our findings using several sensitivity analyses. First, we changed our outcome  
95 from self-reported linkage to care in 2011 or 2012 to 1) self-reported linkage to care at any time between  
96 2011-2015, and 2) confirmation of a clinic appointment for hypertension in 2017 among those who  
97 remained a resident in the catchment area. Next, we compared characteristics of eligible individuals who  
98 did and did not complete blood pressure screening in 2010. Next, we compared characteristics of those  
99 who participated in a subsequent health survey and those who did not, either because of refusal, out-  
100 migration, or death. Finally, we conducted sensitivity analyses in which we: 1) used IPWs of screening in  
101 the models; and 2) added a covariate to indicate the number of individual health surveys participated in  
102 during 2011-2015. Data were entered and verified in an SQL database, and were analyzed using Stata 14  
103 (StataCorp, College Station, TX).

104

### 105 *Human Studies Considerations*

106 Ethical approval for the demographic surveillance study and analyses of these data was granted by the  
107 Biomedical Research Ethics Committee of the University of KwaZulu-Natal, South Africa. Separate  
108 informed consent was given for the demographics survey, the blood pressure screening, and the clinic  
109 records abstraction.

110

### 111 *Patient and Public Involvement*

112 Patients were not involved in the design of this study. This analysis was designed by study investigators at  
113 the Africa Health Research Institute intent on leveraging prior home-based screening protocols to inform  
114 and optimize future community-based research, and particularly to improve the public health impact of  
115 such activities. The results of this study were presented to the South African Department of Health Non-  
116 Communicable Diseases Unit and will be disseminated to the community during the monthly scheduled  
117 Africa Health Research Institute community road shows.

118

119

## 120 **RESULTS**

### 121 *Survey participants*

122 A total of 37,693 potentially eligible adults were in the sampling frame. Of these, approximately one  
123 quarter (8,589, 23%) were not available due to out-migration, death or inability to consent and another  
124 2,920 (8%) could not be contacted (Figure 1). Of the remaining 26,184 individuals who were contacted and  
125 eligible for the home-based DHS survey in 2010, 11,814 (45%) consented to participate in the general  
126 health survey and 11,694 (45%) had valid blood pressure measurements. Women, older individuals, and  
127 those of lower socioeconomic position and education were more likely to participate in the survey  
128 (Supplementary Table 1).

129

130 The majority of participants with a blood pressure measurement were women (n=8,241, 71%, Table 1).

131 Median age was 25 years (interquartile range [IQR] 18–47 years) for men and 38 years (IQR 23–55 years)

132 for women. The majority of participants (n=7,464, 64%) resided in a rural setting, and less than one quarter

133 (n=2,642, 23%) lived within 1.5 kilometers of the nearest clinic. Few participants (n=1,779, 15%) were

134 currently employed.

135

### 136 *Screening for hypertension*

137 Approximately one quarter (n=3,074, 26.2%) of participants were found to have elevated pressure during

138 the home-based blood pressure screening, of whom 1,368 (44.5%) reported having been previously

139 diagnosed or currently on treatment. Of those who had been previously diagnosed or in hypertension care,

140 1,169 (85.5%) were currently on hypertension treatment. Participants who were not previously aware of

141 their condition were significantly younger, and more likely to be men, married, employed, have a higher

142 level of education, and be living in peri-urban areas than those who had been previously diagnosed or on

143 treatment (Table 1). However, there was no evidence of a difference between the two groups in the

144 distance from their nearest clinic.

145

### 146 *Analytic Sample*

147 A total of 1,199 individuals (70.3%) who were not previously aware of having elevated blood pressure

148 participated in a second general health survey within two years of being screened (that is, in 2011 or

149 2012), and were included in the primary analysis of factors associated with linkage to hypertension care.

150 Compared with the 507 individuals who did not participate in 2011 or 2012, those who participated in

151 2011 or 2012 were older (median (IQR) age = 50 (38–66) years, vs 43 (29–58) years), more likely to be

152 women, unmarried, have lower levels of education, be unemployed, and have a higher BMI

153 (Supplementary Table 2). There was no difference in participation rates by distance from the nearest clinic.

154 When we expanded the observation period to include surveys from 2011–2015, a total of 1,421 (83.3%)

155 participated in at least one home-based annual general health survey. Of the 285 (16.7%) individuals who

156 did not participate in any health survey after 2010, 81 out-migrated and 36 died before the 2011 survey  
157 (Figure 1). The remaining 168 were eligible for at least one subsequent survey but refused participation.

158

### 159 *Linkage to subsequent hypertension care*

160 Using IPWs to estimate population level linkage to care, we estimate a population level prevalence of  
161 linkage to care within two years of the blood pressure screen of 26.9% (95%CI=24.5-29.4%). Women were  
162 more likely than men to link to care, and older individuals were more likely than younger individuals  
163 (Figure 2), such that we estimate that 44.9% (95%CI=39.4-50.5%) of women  $\geq 60$  years presented to care  
164 for hypertension in the next two years, versus only 3.0% (95%CI=1.1-7.7%) of men under 45. When we  
165 extended our surveillance period out to 2015, we estimate that 38.1% (95%CI=35.6-40.7%) of individuals  
166 reported linking to hypertension care within 5 years. Finally, we found that only 16.6% (95%CI=14.6-18.9%)  
167 of individuals who remained a resident in 2016 and who screened positive for elevated blood pressure in  
168 2010 completed a clinic appointment for hypertension at one of the public health clinics in the catchment  
169 area in 2016.

170

### 171 *Factors associated with presentation to hypertension care within two years*

172 We found strong evidence that women (OR=2.76, 95%CI=1.97 – 3.88,  $p < 0.001$ ) and those of older age  
173 (OR=12.89, 95%CI 6.62 – 25.11,  $p < 0.0001$ , comparing those 45-59 years versus those  $< 30$ ) were more likely  
174 to present to hypertension care within two years of home-based diagnosis (Table 2). In adjusted analysis,  
175 the association with age and sex remained statistically significant, and there was no evidence that the  
176 effect of age on linkage to care differed between men and women ( $p$ -value for interaction=0.20, Figure 2).  
177 There was evidence that those who were unemployed were more likely to link to care (adjusted (a)OR  
178 2.09, 95%CI 1.39 – 3.14). There was an association between distance from clinic and linkage to  
179 hypertension care such that odds of presentation increased as distance to the clinic increased (aOR for  
180 linear trend in linkage with each 1 km increase in distance = 1.12, 95%CI=1.05–1.20,  $p < 0.001$ ). The results  
181 of the fractional polynomial models suggested that the linear model adequately described the relationship

182 between presentation to care and distance. After adjusting for sociodemographic and location factors, we  
183 also found strong evidence that individuals with the equivalent of Stage II hypertension (aOR=2.20,  
184 95%CI=1.63 – 2.97), and those meeting criteria for hypertensive urgency (aOR=3.07, CI=2.01 – 4.67) had  
185 higher odds of linking to care than those with the equivalent of Stage I hypertension. We found similar  
186 correlates of presentation to hypertension care (age, sex, distance from clinic, and employment) in  
187 sensitivity analyses with weighted models, and in models with a covariate for the number of follow-up  
188 surveys completed during 2011-2015 (Supplementary Tables 3-5).

189

## 190 **DISCUSSION**

191 We found very low rates of presentation to care after home-based identification of elevated blood  
192 pressure in rural KwaZulu Natal. Overall, less than one third of individuals newly identified with elevated  
193 blood pressure reported being diagnosed with hypertension or receiving treatment for elevated blood  
194 pressure from a clinic within two years, and less than one in five had evidence of visiting a clinic for  
195 hypertension care during a 12-month period seven years after the screen. Linkage rates were particularly  
196 low for men and young people. Notably, those employed and those closest to clinics also had poorer rates  
197 of linkage. These results highlight the important need to consider the determinants of healthcare access  
198 for NCDs in rural South Africa, and multi-faceted approaches to improve linkage to care after community-  
199 based NCD screening programs.

200

201 Linkage with clinical programs after community- and home-based disease screening for chronic disease in  
202 sub-Saharan Africa have demonstrated mixed results. Most evidence has come from the HIV field, in which  
203 linkage after home-based testing in pilot studies has been highly successful,<sup>16</sup> although lower rates are  
204 reported in community settings.<sup>9 17</sup> Studies reporting clinic attendance after hypertension screening have  
205 generally shown low rates of linkage to care. For example, in a large (n=6,000) health fair-based screening  
206 program in Uganda, 41% of participants with a new positive screen for elevated blood pressure linked to  
207 care.<sup>9</sup> A smaller pilot study in Kenya yielded higher linkage rates (74%, n=120) after community group-

208 initiated blood pressure screening.<sup>18</sup> Interpreting these contrasting results must be done with attention to  
209 the selection criteria of each. Whereas our procedures were home-based, the larger study from Uganda  
210 included self-referring individuals who had attended a health fair, and the Kenyan study operated through  
211 a peer microfinance program, in which NCD screening services were paired with agribusiness advice within  
212 pre-organized community groups. In the prior report most similar to ours, a large program in Malawi  
213 (n=27,305) that provided clinical referrals after home-based testing reported a 59% linkage rate within two  
214 weeks of a diagnosis of hypertension, although 30% of participants were already on treatment at the time  
215 of referral.<sup>19</sup> Moreover, approximately 50% dropped out of care within 6 months of linkage.

216

217 Predictors of presentation to care in our study reinforce much of the literature on health care access and  
218 engagement among vulnerable populations in sub-Saharan Africa. Lower engagement by younger  
219 individuals and men are well-established phenomena; and a public health challenge for the region.<sup>20 21</sup>

220 Although it did not reach statistical significance, we also found evidence that those with greater social  
221 support, as evidenced by having a cohabitating partner, tended to be more likely to present to care. An  
222 unexpected finding was that those who were unemployed and those further from clinic were more likely  
223 to link to care. This finding contrasts with much of the data from the region on how distance from health  
224 services impacts linkage to and retention in care.<sup>22-24</sup> We hypothesize that these results illustrate  
225 competing demands between obligations to work and to access healthcare. Notably, a similar  
226 phenomenon was found in the Malawi home-based NCD screening study, in which rural participants had  
227 more than twice the odds of linkage to NCD care than their urban counterparts, and the most common  
228 reason stated for failure to link to care in urban areas was being too busy to attend clinic; reported in 34%  
229 of those not linked to care.<sup>19</sup> Employment is higher in male than in female South African blacks<sup>25</sup>, and so  
230 may also contribute to the gender difference in linkage.

231

232 Our data do offer multiple potential strategies to improve linkage to care after home-based NCD screening.  
233 For example, a notable distinction between many community-based HIV and NCD diagnostic programs is

234 the degree of counseling and referral services provided after diagnosis. Hypertension referral services in  
235 our program and many others in the region are often limited to distribution of results and referral forms.  
236 In contrast, decades of standardizing in-depth HIV counseling services, and additional facilitated linkage  
237 strategies have significantly improved rates of linkage after a new HIV diagnosis.<sup>26</sup> Pilot studies of  
238 enhanced referral after community based NCD diagnoses have also shown promise in vulnerable  
239 populations in the United States,<sup>27 28</sup> and warrant investigation on a larger scale elsewhere. Similarly, our  
240 finding and that of others that hypertension linkage was less common in those employed presents a  
241 potential opportunity to consider expanded clinic service hours and/or community based management to  
242 improve NCD care in the region. Endeavors, such as the Centralised Chronic Medication Dispensing and  
243 Distribution recently launched by the KwaZulu Natal Department of Health, seek to overcome such barriers  
244 by delivering medicines to peoples' homes and workplaces, or setting up community-based medicine  
245 pickup points. Evaluations of the efficacy and sustainability of such programs will be of high importance to  
246 the field.

247  
248 Our study is strengthened by a large sample size and the use of a home-based testing paradigm. The  
249 primary limitation to our analysis is the relatively low response rate in the initial hypertension screen and  
250 participation in subsequent surveys. We accounted for this limitation by comparing characteristics  
251 between participants and non-participants, and by using inverse probability weighting techniques to make  
252 population level inferences. Our study is also limited by a use of self-report to detect linkage to clinical care  
253 over the first two years of observation, which likely results in incomplete estimation of outcomes. Use of  
254 clinical records to assess long-term care seven years after the initial screen might also under-estimate  
255 appropriate maintenance in care for individuals who normalized their blood pressure in the interim.  
256 Finally, our results should be considered in the context of the low-resource, rural sub-Saharan Africa study  
257 setting, but are unlikely to generalize more broadly to urban or higher resource regions.

258

1 259 In summary, we found very low rates of linkage to care after a population-level, home-based hypertension  
2  
3 260 screen in rural KwaZulu Natal. Strategies focused on increased demand generation, particularly for  
4  
5 261 younger individuals and men, augmented referral and linkage programs, and efforts to enhance the  
6  
7 262 convenience of service delivery, particularly to employed people, should be evaluated to improve NCD  
8  
9 263 care access after community based testing in the region.

10  
11 264  
12  
13  
14  
15  
16  
17  
18  
19  
20  
21  
22  
23  
24  
25  
26  
27  
28  
29  
30  
31  
32  
33  
34  
35  
36  
37  
38  
39  
40  
41  
42  
43  
44  
45  
46  
47  
48  
49  
50  
51  
52  
53  
54  
55  
56  
57  
58  
59  
60

For peer review only



265

**266 Author Contributions:**

267 MJS: Conceived of the project, wrote the first draft, and contributed to the data analysis.

268 KB: Led the data analysis, contributed to manuscript production.

269 JOB: Helped conceive of the project and contributed to manuscript production.

270 DP: Contributed to data collection, project conception, and contributed to manuscript production.

271 OK: Contributed to data collection, project conception, and contributed to manuscript production.

272 EW: Contributed to data collection and project conception.

273 PM: Contributed to data collection, project conception, and contributed to manuscript production.

274 FT: Contributed to data collection and project conception.

275 KH: Contributed to data collection and project conception.

276 TB: Contributed to data collection, project conception, and contributed to manuscript production.

277 MB: Contributed to project conception, data analysis, and contributed to manuscript production.

278 All authors reviewed the manuscript for editorial contributions and approved of the final version.

279

**280 Data Sharing:**

281 Data for this analysis is available by emailing Mark Siedner ([msiedner@mgh.harvard.edu](mailto:msiedner@mgh.harvard.edu)) and Kobus

282 Herbst ([kherbst@ahri.org](mailto:kherbst@ahri.org))

283

284

285

286

## REFERENCES

1. Lozano R, Naghavi M, Foreman K, et al. Global and regional mortality from 235 causes of death for 20 age groups in 1990 and 2010: a systematic analysis for the Global Burden of Disease Study 2010. *Lancet* 2012;380(9859):2095-128. doi: 10.1016/S0140-6736(12)61728-0
2. Alwan A, Maclean DR, Riley LM, et al. Monitoring and surveillance of chronic non-communicable diseases: progress and capacity in high-burden countries. *Lancet* 2010;376(9755):1861-8. doi: 10.1016/S0140-6736(10)61853-3
3. Non-communicable Diseases Progress Monitor. World Health Organization. 2017. Available at: [https://ncdalliance.org/sites/default/files/resource\\_files/WHOProgressMonitor2017.pdf](https://ncdalliance.org/sites/default/files/resource_files/WHOProgressMonitor2017.pdf). Accessed 21st November 2017.
4. Global Action Plan for the Prevention and Control of Non-Communicable Diseases 2013-2020. World Health Organization. Available at: [http://apps.who.int/iris/bitstream/10665/94384/1/9789241506236\\_eng.pdf](http://apps.who.int/iris/bitstream/10665/94384/1/9789241506236_eng.pdf). Accessed 21st November, 2017.
5. Yusuf S, Hawken S, Ounpuu S, et al. Effect of potentially modifiable risk factors associated with myocardial infarction in 52 countries (the INTERHEART study): case-control study. *Lancet* 2004;364(9438):937-52. doi: 10.1016/S0140-6736(04)17018-9 [published Online First: 2004/09/15]
6. O'Donnell MJ, Chin SL, Rangarajan S, et al. Global and regional effects of potentially modifiable risk factors associated with acute stroke in 32 countries (INTERSTROKE): a case-control study. *Lancet* 2016;388(10046):761-75. doi: 10.1016/S0140-6736(16)30506-2 [published Online First: 2016/07/20]
7. Health Systems Trust. South African Health Review, 2016.
8. Strategic Plan for the Prevention and Control of Non-Communicable Diseases 2013-17. South African Ministry of Health. Available at: <http://www.hsrc.ac.za/uploads/pageContent/3893/NCDs STRAT PLAN CONTENT 8 april proof.pdf> Accessed 21st November 2017.
9. Chamie G, Kwarisiima D, Clark TD, et al. Leveraging rapid community-based HIV testing campaigns for non-communicable diseases in rural Uganda. *PLoS One* 2012;7(8):e43400. doi: 10.1371/journal.pone.0043400 [published Online First: 2012/08/24]
10. Gaziano TA, Abrahams-Gessel S, Denman CA, et al. An assessment of community health workers' ability to screen for cardiovascular disease risk with a simple, non-invasive risk assessment instrument in Bangladesh, Guatemala, Mexico, and South Africa: an observational study. *The Lancet Global health* 2015;3(9):e556-63. doi: 10.1016/S2214-109X(15)00143-6 [published Online First: 2015/07/19]
11. Tanser F, Hosegood V, Barnighausen T, et al. Cohort Profile: Africa Centre Demographic Information System (ACDIS) and population-based HIV survey. *International journal of epidemiology* 2008;37(5):956-62. doi: 10.1093/ije/dym211 [published Online First: 2007/11/14]
12. World Health Organization. Noncommunicable diseases and mental health cluster. WHO STEPS Surveillance Manual: The WHO STEPwise Approach to Chronic Disease Risk Factor Surveillance. Geneva. 2005
13. Malaza A, Mossong J, Barnighausen T, et al. Hypertension and obesity in adults living in a high HIV prevalence rural area in South Africa. *PLoS One* 2012;7(10):e47761. doi: 10.1371/journal.pone.0047761
14. Glanz K, Rimer BK, Viswanath K. Health behavior and health education: Theory, Research and Practice. 4th ed. San Francisco, CA: Jossey-Bass 2008.
15. Royston P, Ambler G, Sauerbrei W. The use of fractional polynomials to model continuous risk variables in epidemiology. *International journal of epidemiology* 1999;28(5):964-74. [published Online First: 1999/12/22]
16. van Rooyen H, Barnabas RV, Baeten JM, et al. High HIV testing uptake and linkage to care in a novel program of home-based HIV counseling and testing with facilitated referral in KwaZulu-Natal, South Africa. *J Acquir Immune Defic Syndr* 2013;64(1):e1-8. doi: 10.1097/QAI.0b013e31829b567d [published Online First: 2013/05/30]

17. Iwuji CC, Orne-Gliemann J, Larmarange J, et al. Universal test and treat and the HIV epidemic in rural South Africa: a phase 4, open-label, community cluster randomised trial. *Lancet HIV* 2017 doi: 10.1016/S2352-3018(17)30205-9 [published Online First: 2017/12/05]
18. Pastakia SD, Manyara SM, Vedanthan R, et al. Impact of Bridging Income Generation with Group Integrated Care (BIGPIC) on Hypertension and Diabetes in Rural Western Kenya. *J Gen Intern Med* 2017;32(5):540-48. doi: 10.1007/s11606-016-3918-5 [published Online First: 2016/12/07]
19. Musicha C, Crampin AC, Kayuni N, et al. Accessing clinical services and retention in care following screening for hypertension and diabetes among Malawian adults: an urban/rural comparison. *Journal of hypertension* 2016;34(11):2172-9. doi: 10.1097/HJH.0000000000001070 [published Online First: 2016/08/24]
20. Kotwani P, Balzer L, Kwarisiima D, et al. Evaluating linkage to care for hypertension after community-based screening in rural Uganda. *Trop Med Int Health* 2014;19(4):459-68. doi: 10.1111/tmi.12273 [published Online First: 2014/02/06]
21. Zack RM, Irema K, Kazonda P, et al. Determinants of high blood pressure and barriers to diagnosis and treatment in Dar es Salaam, Tanzania. *Journal of hypertension* 2016;34(12):2353-64. doi: 10.1097/HJH.0000000000001117 [published Online First: 2016/11/03]
22. Lankowski AJ, Siedner MJ, Bangsberg DR, et al. Impact of geographic and transportation-related barriers on HIV outcomes in sub-Saharan Africa: a systematic review. *AIDS Behav* 2014;18(7):1199-223. doi: 10.1007/s10461-014-0729-8
23. Siedner MJ, Lankowski A, Tsai AC, et al. GPS-measured distance to clinic, but not self-reported transportation factors, are associated with missed HIV clinic visits in rural Uganda. *AIDS* 2013;27(9):1503-8. doi: 10.1097/QAD.0b013e32835fd873
24. Tanser F, Gijsbertsen B, Herbst K. Modelling and understanding primary health care accessibility and utilization in rural South Africa: an exploration using a geographical information system. *Social science & medicine* 2006;63(3):691-705. doi: 10.1016/j.socscimed.2006.01.015 [published Online First: 2006/04/01]
25. Statistics South Africa. Gender statistics in South Africa, 2011. <http://www.statssa.gov.za/publications/Report-03-10-05/Report-03-10-052011.pdf> (accessed 27 February 2017).
26. Sharma M, Ying R, Tarr G, et al. Systematic review and meta-analysis of community and facility-based HIV testing to address linkage to care gaps in sub-Saharan Africa. *Nature* 2015;528(7580):S77-85. doi: 10.1038/nature16044 [published Online First: 2015/12/04]
27. Krieger J, Collier C, Song L, et al. Linking community-based blood pressure measurement to clinical care: a randomized controlled trial of outreach and tracking by community health workers. *Am J Public Health* 1999;89(6):856-61. [published Online First: 1999/06/08]
28. Baig AA, Mangione CM, Sorrell-Thompson AL, et al. A randomized community-based intervention trial comparing faith community nurse referrals to telephone-assisted physician appointments for health fair participants with elevated blood pressure. *J Gen Intern Med* 2010;25(7):701-9. doi: 10.1007/s11606-010-1326-9 [published Online First: 2010/03/30]

**Table 1.** Participants with blood pressure measured in in 2010 survey, those with hypertension<sup>1</sup> and stratified by whether or not previously diagnosed or on treatment

|                                            | All participants | N with hypertension <sup>1</sup> | Previously diagnosed <sup>2</sup> | Not previously diagnosed <sup>3</sup> |
|--------------------------------------------|------------------|----------------------------------|-----------------------------------|---------------------------------------|
|                                            | N=11,694         | N=3074 (26.2%)                   | N=1368 (44.5%)                    | N=1706 (55.5%)                        |
| <b>Median (IQR) age (years)</b>            | 34 (21–53)       | 55 (43–68)                       | 60 (51–71)                        | 49 (35–63)                            |
| <b>Age group</b>                           |                  |                                  |                                   | P<0.001 <sup>4</sup>                  |
| <30                                        | 5107 (43.7%)     | 354 (11.5%)                      | 21 (1.5 %)                        | 333 (19.5%)                           |
| 35-44                                      | 2191 (18.7%)     | 484 (15.7%)                      | 118 (8.6 %)                       | 366 (21.5%)                           |
| 45-59                                      | 2265 (19.4%)     | 992 (32.3%)                      | 507 (37.1%)                       | 485 (28.4%)                           |
| 60+                                        | 2131 (18.2%)     | 1244 (40.5%)                     | 722 (52.8%)                       | 522 (30.6%)                           |
| <b>Sex</b>                                 |                  |                                  |                                   | P<0.001                               |
| Male                                       | 3453 (29.5%)     | 720 (23.4%)                      | 178 (13.0%)                       | 542 (31.8%)                           |
| Female                                     | 8241 (70.5%)     | 2354 (76.6%)                     | 1190 (87.0%)                      | 1164 (68.2%)                          |
| <b>Education</b>                           |                  |                                  |                                   | P<0.001                               |
| None                                       | 2389 (20.5%)     | 1032 (33.6%)                     | 550 (40.2%)                       | 482 (28.3%)                           |
| Less than complete secondary               | 6244 (53.5%)     | 1463 (47.6%)                     | 662 (48.4%)                       | 801 (47.0%)                           |
| Complete secondary/above                   | 3040 (26.0%)     | 576 (18.8%)                      | 155 (11.3%)                       | 421 (24.7%)                           |
| Missing                                    | 21               | 3                                | 1                                 | 2                                     |
| <b>Marital status</b>                      |                  |                                  |                                   | P<0.001                               |
| Single (never married)                     | 3462 (29.8%)     | 518 (16.9%)                      | 174 (12.7%)                       | 344 (20.2%)                           |
| Married/informal union                     | 6556 (56.3%)     | 1696 (55.2%)                     | 688 (50.3%)                       | 1008 (59.2%)                          |
| Widowed/separated/divorced                 | 1618 (13.9%)     | 857 (27.9%)                      | 506 (37.0%)                       | 351 (20.6%)                           |
| Missing                                    | 58               | 3                                | 0                                 | 3                                     |
| <b>Employed</b>                            |                  |                                  |                                   | P<0.001                               |
| Yes                                        | 1779 (15.3%)     | 437 (14.2%)                      | 140 (10.2%)                       | 297 (17.4%)                           |
| No                                         | 9828 (84.7%)     | 2634 (85.8%)                     | 1228 (89.8%)                      | 1406 (82.6%)                          |
| Missing                                    | 87               | 3                                | 0                                 | 3                                     |
| <b>Residence</b>                           |                  |                                  |                                   | P<0.001                               |
| Urban                                      | 617 (5.3 %)      | 119 (3.9 %)                      | 55 (4.0 %)                        | 64 (3.8 %)                            |
| Peri-urban                                 | 3604 (30.8%)     | 904 (29.4%)                      | 347 (25.4%)                       | 557 (32.7%)                           |
| Rural                                      | 7464 (63.9%)     | 2050 (66.7%)                     | 966 (70.6%)                       | 1084 (63.6%)                          |
| Missing                                    | 9                | 1                                | 0                                 | 1                                     |
| <b>SES tertile</b>                         |                  |                                  |                                   | P=0.67                                |
| Low                                        | 4193 (36.4%)     | 1173 (38.6%)                     | 525 (38.7%)                       | 648 (38.5%)                           |
| Middle                                     | 3818 (33.1%)     | 947 (31.2%)                      | 412 (30.4%)                       | 535 (31.8%)                           |
| High                                       | 3522 (30.5%)     | 918 (30.2%)                      | 418 (30.8%)                       | 500 (29.7%)                           |
| Missing                                    | 161              | 36                               | 13                                | 23                                    |
| <b>Self-report of diabetes<sup>5</sup></b> |                  |                                  |                                   | P<0.001                               |
| No                                         | 11300 (96.6%)    | 2867 (93.3%)                     | 1176 (86.0%)                      | 1691 (99.1%)                          |
| Yes                                        | 394 (3.4 %)      | 207 (6.7 %)                      | 192 (14.0%)                       | 15 (0.9 %)                            |
| <b>Nearest clinic (km)<sup>6</sup></b>     |                  |                                  |                                   | P=0.84                                |
| 0- <1.5                                    | 2642 (22.6%)     | 676 (22.0%)                      | 292 (21.3%)                       | 384 (22.5%)                           |
| 1.5-2.5                                    | 2879 (24.6%)     | 710 (23.1%)                      | 314 (23.0%)                       | 396 (23.2%)                           |
| >2.5-3.9                                   | 2975 (25.5%)     | 809 (26.3%)                      | 368 (26.9%)                       | 441 (25.9%)                           |
| >3.9                                       | 3189 (27.3%)     | 878 (28.6%)                      | 394 (28.8%)                       | 484 (28.4%)                           |
| Missing                                    | 9                | 1                                | 0                                 | 1                                     |

<sup>1</sup>Hypertension defined as systolic BP  $\geq$  140mmHg or diastolic BP  $\geq$ 90 mmHg, in an average of 2 readings. <sup>2</sup>Report having been previously diagnosed or on treatment for hypertension in 2010 survey. <sup>3</sup>Report no previous diagnosis or treatment for hypertension in 2010 survey. <sup>4</sup>P-value from Chi-squared test comparing characteristics of those previously diagnosed/treatment and those with no previous diagnosis/treatment. <sup>5</sup>Report having been diagnosed with or on treatment for diabetes in 2010 survey. <sup>6</sup>Quartiles based on distribution in all individuals who were eligible for 2010 survey.

**Table 2.** Factors<sup>1</sup> associated with linkage to hypertension care within 2 years after home-based diagnosis of hypertension<sup>2</sup> in 2010, among individuals who were previously undiagnosed and participated in 2011 or 2012 (N=1199) (unweighted analysis)

|                                            | Linked to care/N (%) | Crude OR (95% CI)              | Age- & sex-adjusted OR (95% CI) | Adjusted OR (95% CI) <sup>3</sup> |
|--------------------------------------------|----------------------|--------------------------------|---------------------------------|-----------------------------------|
| <b>Sociodemographic factors</b>            |                      |                                |                                 |                                   |
| <b>Age group</b>                           |                      | P<0.001                        | P<0.001                         | P<0.001                           |
| <30                                        | 10 / 193 (5.2 %)     | 1                              | 1                               | 1                                 |
| 35-44                                      | 40 / 242 (16.5%)     | 3.62 (1.76 -7.45 )             | 3.08 (1.49 -6.36 )              | 3.32 (1.60 -6.89 )                |
| 45-59                                      | 126 / 360 (35.0%)    | 9.85 (5.03 -19.30)             | 8.39 (4.26 -16.51)              | 9.01 (4.57 -17.79)                |
| 60+                                        | 167 / 404 (41.3%)    | 12.89 (6.62 -25.11)            | 11.61 (5.94 -22.69)             | 11.49 (5.87 -22.46)               |
| <b>Sex</b>                                 |                      | P<0.001                        | P<0.001                         | P<0.001                           |
| Male                                       | 47 / 308 (15.3%)     | 1                              | 1                               | 1                                 |
| Female                                     | 296 / 891 (33.2%)    | 2.76 (1.97 -3.88 )             | 2.50 (1.75 -3.57 )              | 2.41 (1.68 -3.45 )                |
| <b>Marital status</b>                      |                      | P<0.001                        | P=0.15                          | P=0.14                            |
| Single (never married)                     | 55 / 250 (22.0%)     | 1                              | 1                               | 1                                 |
| Married/informal union                     | 178 / 666 (26.7%)    | 1.29 (0.92 -1.83 )             | 1.33 (0.91 -1.95 )              | 1.35 (0.92 -1.98 )                |
| Widow/sep/divorced                         | 110 / 283 (38.9%)    | 2.25 (1.54 -3.31 )             | 0.98 (0.64 -1.50 )              | 0.99 (0.65 -1.51 )                |
| <b>Education</b>                           |                      | P<0.001                        | P=0.83                          | P=0.77                            |
| None                                       | 132 / 363 (36.4%)    | 1                              | 1                               | 1                                 |
| Less than complete secondary               | 160 / 581 (27.5%)    | 0.67 (0.50 -0.88 )             | 1.10 (0.81 -1.49 )              | 1.09 (0.80 -1.49 )                |
| Complete secondary/above                   | 51 / 255 (20.0%)     | 0.44 (0.30 -0.64 )             | 1.09 (0.71 -1.67 )              | 1.15 (0.75 -1.78 )                |
| <b>Employed</b>                            |                      | P<0.001                        | P=0.02                          | P=0.02                            |
| Yes                                        | 31 / 178 (17.4%)     | 1                              | 1                               | 1                                 |
| No                                         | 312 / 1021 (30.6%)   | 2.09 (1.39 -3.14 )             | 1.71 (1.10 -2.65 )              | 1.71 (1.10 -2.65 )                |
| <b>SES tertile</b>                         |                      | P=0.307                        | P=0.31                          | P=0.21                            |
| Low                                        | 125 / 459 (27.2%)    | 1                              | 1                               | 1                                 |
| Middle                                     | 99 / 364 (27.2%)     | 1.00 (0.73 -1.36 )             | 1.09 (0.79 -1.52 )              | 1.12 (0.81 -1.56 )                |
| High                                       | 115 / 364 (31.6%)    | 1.23 (0.91 -1.67 )             | 1.28 (0.93 -1.77 )              | 1.34 (0.97 -1.85 )                |
| <b>Location factors</b>                    |                      |                                |                                 |                                   |
| <b>Residence</b>                           |                      | P=0.04                         | P=0.35                          | P=0.55                            |
| Urban                                      | 10 / 36 (27.8%)      | 1                              | 1                               | 1                                 |
| Peri-urban                                 | 95 / 398 (23.9%)     | 0.82 (0.38 -1.75 )             | 0.75 (0.33 -1.69 )              | 0.67 (0.29 -1.53 )                |
| Rural                                      | 238 / 765 (31.1%)    | 1.17 (0.56 -2.47 )             | 0.92 (0.41 -2.05 )              | 0.63 (0.27 -1.45 )                |
| <b>Nearest clinic (km)<sup>4</sup></b>     |                      |                                |                                 |                                   |
| 0- <1.5                                    | 56 / 263 (21.3%)     |                                |                                 |                                   |
| 1.5-2.5                                    | 71 / 269 (26.4%)     | P<0.001                        | P=0.001                         | P=0.001                           |
| >2.5-3.9                                   | 93 / 310 (30.0%)     | 1.15 (1.08 -1.23) <sup>5</sup> | 1.13 (1.05 -1.21) <sup>5</sup>  | 1.12 (1.05 -1.20) <sup>5</sup>    |
| >3.9                                       | 123 / 357 (34.5%)    |                                |                                 |                                   |
| <b>Clinical factors</b>                    |                      |                                |                                 |                                   |
| <b>BMI category</b>                        |                      | P<0.001                        | P=0.07                          | P=0.13                            |
| <25 kg/m <sup>2</sup>                      | 70 / 344 (20.3%)     | 1                              | 1                               | 1                                 |
| 25 – <30 kg/m <sup>2</sup>                 | 62 / 229 (27.1%)     | 1.45 (0.98 -2.15 )             | 1.08 (0.71 -1.64 )              | 1.17 (0.76 -1.81 )                |
| ≥30 kg/m <sup>2</sup>                      | 110 / 301 (36.5%)    | 2.25 (1.59 -3.21 )             | 1.52 (1.03 -2.24 )              | 1.51 (1.00 -2.26 )                |
| <b>Hypertension stage<sup>6</sup></b>      |                      | P<0.001                        | P<0.001                         | P<0.001                           |
| Stage I                                    | 142 / 730 (19.5%)    | 1                              | 1                               | 1                                 |
| Stage II                                   | 134 / 342 (39.2%)    | 2.67 (2.01 -3.54 )             | 2.22 (1.65 -2.99 )              | 2.20 (1.63 -2.97 )                |
| Hypertension urgency                       | 67 / 127 (52.8%)     | 4.62 (3.12 -6.85 )             | 3.12 (2.06 -4.74 )              | 3.07 (2.01 -4.67 )                |
| <b>Self-report of diabetes<sup>7</sup></b> |                      | P=0.19                         | P=0.44                          | P=0.47                            |
| No                                         | 339 / 1191 (28.5%)   | 1                              | 1                               | 1                                 |
| Yes                                        | 4 / 8 (50.0%)        | 2.51 (0.62 -10.11)             | 1.78 (0.41 -7.70 )              | 1.75 (0.38 -8.15 )                |

1  
2  
3  
4  
5  
6  
7  
8  
9  
10  
11  
12  
13  
14  
15  
16  
17  
18  
19  
20  
21  
22  
23  
24  
25  
26  
27  
28  
29  
30  
31  
32  
33  
34  
35  
36  
37  
38  
39  
40  
41  
42  
43  
44  
45  
46  
47  
48  
49  
50  
51  
52  
53  
54  
55  
56  
57  
58  
59  
60

| Self-report of TB <sup>7</sup> |                    | P=0.66             | P=0.96             | P=0.72             |
|--------------------------------|--------------------|--------------------|--------------------|--------------------|
| No                             | 332 / 1156 (28.7%) | 1                  | 1                  | 1                  |
| Yes                            | 11 / 43 (25.6%)    | 0.85 (0.43 -1.71 ) | 1.02 (0.49 -2.13 ) | 1.15 (0.54 -2.46 ) |

<sup>1</sup>All characteristics are based on 2010 survey. <sup>2</sup>Hypertension defined as systolic BP  $\geq 140$ mmHg or diastolic BP  $\geq 90$  mmHg, in an average of 2 readings. <sup>3</sup>Sociodemographic factors adjusted for age group, sex, and employment. Location factors adjusted for age group, sex, employment, and distance from nearest clinic as continuous covariate. Clinical factors adjusted for age group, sex, employment, distance from nearest clinic and hypertension stage. <sup>4</sup>Quartiles based on distribution in all individuals who were eligible for 2010 survey. Fit as continuous covariate; n (%) linked in each distance quartile shown for information only. <sup>5</sup>OR for linear trend in linkage with each 1 km increase in distance. <sup>6</sup>Stage I: Systolic BP 140–159 or diastolic BP 90–99; Stage II: Systolic BP 160–179 or diastolic BP 100–119; Hypertension urgency: Systolic BP  $\geq 180$  or diastolic BP  $\geq 120$ . <sup>7</sup>Reports being diagnosed in the past 12m or currently on treatment

For peer review only

1  
2  
3  
4  
5  
6  
7  
8  
9  
10  
11  
12  
13  
14  
15  
16  
17  
18  
19  
20  
21  
22  
23  
24  
25  
26  
27  
28  
29  
30  
31  
32  
33  
34  
35  
36  
37  
38  
39  
40  
41  
42  
43  
44  
45  
46  
47  
48  
49  
50  
51  
52  
53  
54  
55  
56  
57  
58  
59  
60

**Figure 1.** Flow diagram of eligible and included participants in a baseline community-based hypertension screen in 2010 and follow-up observation during 2011/2012

For peer review only

1  
2  
3  
4 **Figure 2.** Proportion of individuals linked to hypertensive care two years after a new  
5 notification of elevated blood pressure (weighted estimates)  
6  
7  
8  
9  
10  
11  
12  
13  
14  
15  
16  
17  
18  
19  
20  
21  
22  
23  
24  
25  
26  
27  
28  
29  
30  
31  
32  
33  
34  
35  
36  
37  
38  
39  
40  
41  
42  
43  
44  
45  
46  
47  
48  
49  
50  
51  
52  
53  
54  
55  
56  
57  
58  
59  
60

For peer review only



1  
2  
3  
4  
5  
6  
7  
8  
9  
10  
11  
12  
13  
14  
15  
16  
17  
18  
19  
20  
21  
22  
23  
24  
25  
26  
27  
28  
29  
30  
31  
32  
33  
34  
35  
36  
37  
38  
39  
40  
41  
42  
43  
44  
45  
46  
47  
48  
49  
50  
51  
52  
53  
54  
55  
56  
57  
58  
59  
60

For peer review only

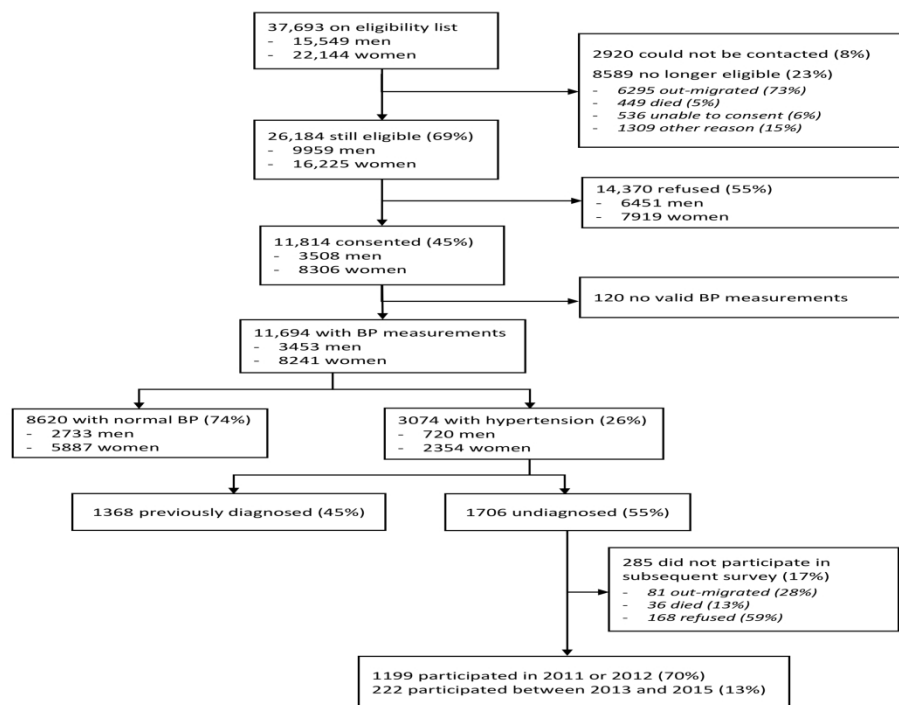

Figure 1. Flow diagram of eligible and included participants in a baseline community-based hypertension screen in 2010 and follow-up observation during 2011/2012

1057x793mm (72 x 72 DPI)

1  
2  
3  
4  
5  
6  
7  
8  
9  
10  
11  
12  
13  
14  
15  
16  
17  
18  
19  
20  
21  
22  
23  
24  
25  
26  
27  
28  
29  
30  
31  
32  
33  
34  
35  
36  
37  
38  
39  
40  
41  
42  
43  
44  
45  
46  
47  
48  
49  
50  
51  
52  
53  
54  
55  
56  
57  
58  
59  
60

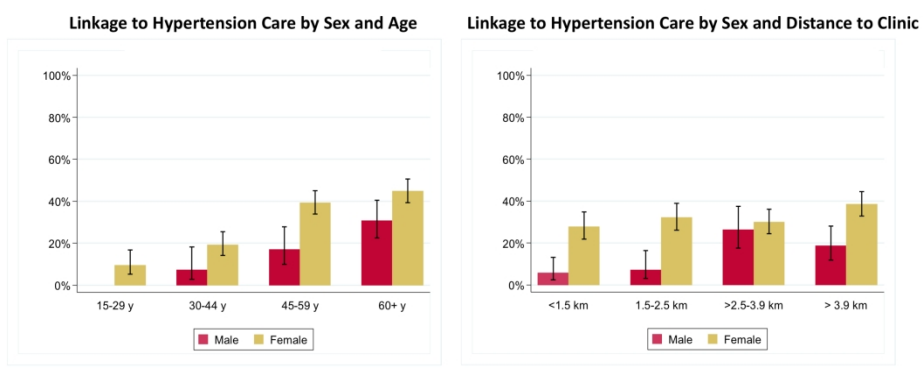

Figure 2. Proportion of individuals linked to hypertensive care two years after a new notification of elevated blood pressure (weighted estimates)

1057x595mm (72 x 72 DPI)

**Supplementary Table 1.** Comparison of characteristics between those for whom a blood pressure measurement was taken in the 2010 survey, and those with no blood pressure measurements

|                                 | Eligible for survey <sup>1</sup> | BP measurements | No BP measurement <sup>2</sup> |
|---------------------------------|----------------------------------|-----------------|--------------------------------|
|                                 | N=26,184                         | N=11,694        | N=14,490                       |
| <b>Median (IQR) age (years)</b> | 32 (20–50)                       | 34 (21–53)      | 30 (20–47)                     |
| <b>Age group</b>                |                                  |                 | <b>P&lt;0.001<sup>3</sup></b>  |
| <30                             | 12,164 (46.5%)                   | 5106 (43.7%)    | 7058 (48.7%)                   |
| 35–44                           | 5523 (21.1%)                     | 2194 (18.8%)    | 3329 (23.0%)                   |
| 45–59                           | 4584 (17.5%)                     | 2251 (19.2%)    | 2333 (16.1%)                   |
| 60+                             | 3913 (14.9%)                     | 2143 (18.3%)    | 1770 (12.2%)                   |
| <b>Sex</b>                      |                                  |                 | <b>P&lt;0.001</b>              |
| Male                            | 9959 (38.0%)                     | 3453 (29.5%)    | 6506 (44.9%)                   |
| Female                          | 16,225 (62.0%)                   | 8241 (70.5%)    | 7984 (55.1%)                   |
| <b>Marital status</b>           |                                  |                 | <b>P&lt;0.001</b>              |
| Single (never married)          | 8113 (31.2%)                     | 3462 (29.8%)    | 4651 (32.4%)                   |
| Married/informal union          | 14,959 (57.6%)                   | 6556 (56.3%)    | 8403 (58.6%)                   |
| Widow/sep/divorced              | 2910 (11.2%)                     | 1618 (13.9%)    | 1292 (9.0%)                    |
| Missing                         | 202                              | 58              | 144                            |
| <b>Education</b>                |                                  |                 | <b>P&lt;0.001</b>              |
| None                            | 4558 (17.5%)                     | 2389 (20.5%)    | 2169 (15.1%)                   |
| Less than complete secondary    | 13,466 (51.6%)                   | 6244 (53.5%)    | 7222 (50.1%)                   |
| Complete secondary/above        | 8051 (30.9%)                     | 3040 (26.0%)    | 5011 (34.8%)                   |
| Missing                         | 109                              | 21              | 88                             |
| <b>Employed</b>                 |                                  |                 | <b>P&lt;0.001</b>              |
| Yes                             | 5860 (22.7%)                     | 1779 (15.3%)    | 4081 (28.6%)                   |
| No                              | 19,997 (77.3%)                   | 9828 (84.7%)    | 10,169 (71.4%)                 |
| Missing                         | 327                              | 87              | 240                            |
| <b>Residence</b>                |                                  |                 | <b>P&lt;0.001</b>              |
| Urban                           | 1953 (7.5%)                      | 617 (5.3%)      | 1336 (9.2%)                    |
| Peri-urban                      | 8084 (30.9%)                     | 3604 (30.8%)    | 4480 (31.0%)                   |
| Rural                           | 16,092 (61.6%)                   | 7464 (63.9%)    | 8628 (59.7%)                   |
| Missing                         | 55                               | 9               | 46                             |
| <b>SES tertile</b>              |                                  |                 | <b>P&lt;0.001</b>              |
| Low                             | 8566 (33.6%)                     | 4193 (36.4%)    | 4373 (31.4%)                   |
| Middle                          | 8330 (32.7%)                     | 3818 (33.1%)    | 4512 (32.4%)                   |
| High                            | 8569 (33.7%)                     | 3522 (30.5%)    | 5047 (36.2%)                   |
| Missing                         | 719                              | 161             | 558                            |

<sup>1</sup>Individuals who were on the eligibility list for the 2010 survey (aged ≥15 years as of Dec 2009 and resident in the DSS), were successfully contacted (92% of all on the list) and still eligible at the time of contact (75% of those contacted). <sup>2</sup>Includes 14,370 individuals who refused consent, and 120 individuals who consented but for whom blood pressure measurements were not available. <sup>3</sup>P-value from Chi-squared test comparing those with blood pressure measurements and those without.

**Supplementary Table 2.** Comparison of characteristics between those who participated in the general health survey in 2011 or 2012 and those who did not, among 1706 individuals with undiagnosed hypertension in 2010

|                                        | Participated in<br>2011/2012 | Did not participate<br>in 2011/2012 | Participated in<br>2011–2016 | No participation in<br>later survey |
|----------------------------------------|------------------------------|-------------------------------------|------------------------------|-------------------------------------|
|                                        | N=1199 (70.3%)               | N=507 (29.7%)                       | N=1421 (83.3%)               | N=285 (16.7%)                       |
| <b>Median (IQR) age (years)</b>        | 50 (38–66)                   | 43 (29–58)                          | 50 (37–65)                   | 41 (28–57)                          |
| <b>Age group</b>                       |                              | P<0.001 <sup>1</sup>                |                              | P<0.001 <sup>2</sup>                |
| <30                                    | 193 (16.1%)                  | 140 (27.6%)                         | 248 (17.5%)                  | 85 (29.8%)                          |
| 35–44                                  | 242 (20.2%)                  | 124 (24.5%)                         | 284 (20.0%)                  | 82 (28.8%)                          |
| 45–59                                  | 360 (30.0%)                  | 125 (24.7%)                         | 430 (30.3%)                  | 55 (19.3%)                          |
| 60+                                    | 404 (33.7%)                  | 118 (23.3%)                         | 459 (32.3%)                  | 63 (22.1%)                          |
| <b>Sex</b>                             |                              | P<0.001                             |                              | P<0.001                             |
| Male                                   | 308 (25.7%)                  | 234 (46.2%)                         | 394 (27.7%)                  | 148 (51.9%)                         |
| Female                                 | 891 (74.3%)                  | 273 (53.8%)                         | 1027 (72.3%)                 | 137 (48.1%)                         |
| <b>Marital status</b>                  |                              | P<0.001                             |                              | P<0.001                             |
| Single (never married)                 | 250 (20.9%)                  | 94 (18.7%)                          | 287 (20.2%)                  | 57 (20.2%)                          |
| Married/informal union                 | 666 (55.5%)                  | 342 (67.9%)                         | 817 (57.5%)                  | 191 (67.7%)                         |
| Widow/sep/divorced                     | 283 (23.6%)                  | 68 (13.5%)                          | 317 (22.3%)                  | 34 (12.1%)                          |
| <b>Education</b>                       |                              | P<0.001                             |                              | P<0.001                             |
| None                                   | 363 (30.3%)                  | 119 (23.6%)                         | 424 (29.8%)                  | 58 (20.5%)                          |
| Less than complete<br>secondary        | 581 (48.5%)                  | 220 (43.6%)                         | 678 (47.7%)                  | 123 (43.5%)                         |
| Complete secondary/above               | 255 (21.3%)                  | 166 (32.9%)                         | 319 (22.4%)                  | 102 (36.0%)                         |
| <b>Employed</b>                        |                              | P<0.001                             |                              | P<0.001                             |
| Yes                                    | 178 (14.8%)                  | 119 (23.6%)                         | 220 (15.5%)                  | 77 (27.3%)                          |
| No                                     | 1021 (85.2%)                 | 385 (76.4%)                         | 1201 (84.5%)                 | 205 (72.7%)                         |
| <b>Residence</b>                       |                              | P=0.04                              |                              | P=0.16                              |
| Urban                                  | 36 (3.0%)                    | 28 (5.5%)                           | 48 (3.4%)                    | 16 (5.6%)                           |
| Peri-urban                             | 398 (33.2%)                  | 159 (31.4%)                         | 470 (33.1%)                  | 87 (30.6%)                          |
| Rural                                  | 765 (63.8%)                  | 319 (63.0%)                         | 903 (63.5%)                  | 181 (63.7%)                         |
| <b>SES tertile</b>                     |                              | P=0.24                              |                              | P=0.05                              |
| Low                                    | 459 (38.7%)                  | 189 (38.1%)                         | 544 (38.7%)                  | 104 (37.5%)                         |
| Middle                                 | 364 (30.7%)                  | 171 (34.5%)                         | 431 (30.7%)                  | 104 (37.5%)                         |
| High                                   | 364 (30.7%)                  | 136 (27.4%)                         | 431 (30.7%)                  | 69 (24.9%)                          |
| <b>BMI category</b>                    |                              | P=0.008                             |                              | P<0.001                             |
| Underweight                            | 50 (5.7%)                    | 25 (7.2%)                           | 58 (5.6%)                    | 17 (9.0%)                           |
| Normal weight                          | 294 (33.6%)                  | 146 (42.3%)                         | 351 (34.0%)                  | 89 (47.3%)                          |
| Overweight                             | 229 (26.2%)                  | 84 (24.3%)                          | 269 (26.1%)                  | 44 (23.4%)                          |
| Obese                                  | 301 (34.4%)                  | 90 (26.1%)                          | 353 (34.2%)                  | 38 (20.2%)                          |
| <b>Distance to nearest clinic (km)</b> |                              | P=0.22                              |                              | P=0.50                              |
| 0–<1.5                                 | 263 (21.9%)                  | 121 (23.9%)                         | 320 (22.5%)                  | 64 (22.5%)                          |
| 1.5–2.5                                | 269 (22.4%)                  | 127 (25.1%)                         | 323 (22.7%)                  | 73 (25.7%)                          |
| >2.5–3.9                               | 310 (25.9%)                  | 131 (25.9%)                         | 365 (25.7%)                  | 76 (26.8%)                          |
| >3.9                                   | 357 (29.8%)                  | 127 (25.1%)                         | 413 (29.1%)                  | 71 (25.0%)                          |

<sup>1</sup>P-value from Chi-squared test comparing individuals who participated in 2011–2012 (N=1199) with those who did not (N=507). <sup>2</sup>P-value from Chi-squared test comparing individuals who participated in 2011–2015 (N=1421) with those who did not (N=285).

**Supplementary Table 3.** Factors<sup>1</sup> associated with linkage to hypertension care within 2 years after home-based diagnosis of hypertension<sup>2</sup> in 2010, among individuals who were previously undiagnosed and participated in 2011 or 2012 (N=1199), using inverse probability weighting to account for non-participation in the blood pressure screen

|                                            | Linked to care/N (%) | Crude OR (95% CI) <sup>3</sup> | Age- & sex-adjusted OR (95% CI) <sup>3</sup> | Adjusted OR (95% CI) <sup>3,4</sup> |
|--------------------------------------------|----------------------|--------------------------------|----------------------------------------------|-------------------------------------|
| <b>Sociodemographic factors</b>            |                      |                                |                                              |                                     |
| <b>Age group</b>                           |                      | P<0.001                        | P<0.001                                      | P<0.001                             |
| <30                                        | 10 / 193 (5.2 %)     | 1                              | 1                                            | 1                                   |
| 35-44                                      | 40 / 242 (16.5%)     | 3.82 (1.85 -7.87 )             | 3.20 (1.55 -6.62 )                           | 3.26 (1.54 -6.90 )                  |
| 45-59                                      | 126 / 360 (35.0%)    | 10.35 (5.28 -20.32)            | 8.64 (4.39 -16.99)                           | 9.35 (4.73 -18.46)                  |
| 60+                                        | 167 / 404 (41.3%)    | 13.75 (7.05 -26.81)            | 12.27 (6.29 -23.91)                          | 13.48 (6.82 -26.61)                 |
| <b>Sex</b>                                 |                      | P<0.001                        | P<0.001                                      | P<0.001                             |
| Male                                       | 47 / 308 (15.3%)     | 1                              | 1                                            | 1                                   |
| Female                                     | 296 / 891 (33.2%)    | 2.86 (2.03 -4.03 )             | 2.57 (1.81 -3.66 )                           | 2.77 (1.91 -4.00 )                  |
| <b>Marital status</b>                      |                      | P<0.001                        | P=0.09                                       | P=0.09                              |
| Single (never married)                     | 55 / 250 (22.0%)     | 1                              | 1                                            | 1                                   |
| Married/informal union                     | 178 / 666 (26.7%)    | 1.35 (0.95 -1.91 )             | 1.35 (0.91 -1.99 )                           | 1.36 (0.92 -2.01 )                  |
| Widow/sep/divorced                         | 110 / 283 (38.9%)    | 2.40 (1.63 -3.54 )             | 0.94 (0.61 -1.44 )                           | 0.95 (0.61 -1.45 )                  |
| <b>Education</b>                           |                      | P<0.001                        | P=0.86                                       | P=0.89                              |
| None                                       | 132 / 363 (36.4%)    | 1                              | 1                                            | 1                                   |
| Less than complete secondary               | 160 / 581 (27.5%)    | 0.64 (0.48 -0.84 )             | 1.09 (0.80 -1.49 )                           | 1.07 (0.78 -1.46 )                  |
| Complete secondary/above                   | 51 / 255 (20.0%)     | 0.42 (0.29 -0.61 )             | 1.06 (0.69 -1.63 )                           | 1.10 (0.71 -1.70 )                  |
| <b>Employed</b>                            |                      | P<0.001                        | P=0.01                                       | P=0.01                              |
| Yes                                        | 31 / 178 (17.4%)     | 1                              | 1                                            | 1                                   |
| No                                         | 312 / 1021 (30.6%)   | 2.21 (1.46 -3.34 )             | 1.74 (1.13 -2.69 )                           | 1.76 (1.14 -2.72 )                  |
| <b>SES tertile</b>                         |                      | P=0.36                         | P=0.32                                       | P=0.26                              |
| Low                                        | 125 / 459 (27.2%)    | 1                              | 1                                            | 1                                   |
| Middle                                     | 99 / 364 (27.2%)     | 1.01 (0.74 -1.38 )             | 1.11 (0.79 -1.55 )                           | 1.12 (0.81 -1.57 )                  |
| High                                       | 115 / 364 (31.6%)    | 1.23 (0.90 -1.66 )             | 1.28 (0.93 -1.77 )                           | 1.31 (0.95 -1.82 )                  |
| <b>Location factors</b>                    |                      |                                |                                              |                                     |
| <b>Residence</b>                           |                      | P=0.03                         | P=0.40                                       | P=0.68                              |
| Urban                                      | 10 / 36 (27.8%)      | 1                              | 1                                            | 1                                   |
| Peri-urban                                 | 95 / 398 (23.9%)     | 0.91 (0.42 -1.96 )             | 0.84 (0.37 -1.89 )                           | 0.73 (0.32 -1.67 )                  |
| Rural                                      | 238 / 765 (31.1%)    | 1.32 (0.62 -2.79 )             | 1.03 (0.47 -2.27 )                           | 0.69 (0.30 -1.59 )                  |
| <b>Nearest clinic (km)<sup>5</sup></b>     |                      |                                |                                              |                                     |
| 0- <1.5                                    | 56 / 263 (21.3%)     |                                |                                              |                                     |
| 1.5-2.5                                    | 71 / 269 (26.4%)     | P<0.001                        | P=0.001                                      | P=0.002                             |
| >2.5-3.9                                   | 93 / 310 (30.0%)     | 1.15 (1.08 -1.23) <sup>6</sup> | 1.13 (1.05 -1.21) <sup>6</sup>               | 1.12 (1.04 -1.20) <sup>6</sup>      |
| >3.9                                       | 123 / 357 (34.5%)    |                                |                                              |                                     |
| <b>Clinical factors</b>                    |                      |                                |                                              |                                     |
| <b>BMI category</b>                        |                      | P<0.001                        | P=0.06                                       | P=0.14                              |
| <25 kg/m <sup>2</sup>                      | 70 / 344 (20.3%)     | 1                              | 1                                            | 1                                   |
| 25 – <30 kg/m <sup>2</sup>                 | 62 / 229 (27.1%)     | 1.56 (1.05 -2.33 )             | 1.13 (0.73 -1.74 )                           | 1.19 (0.77 -1.84 )                  |
| ≥30 kg/m <sup>2</sup>                      | 110 / 301 (36.5%)    | 2.42 (1.69 -3.45 )             | 1.57 (1.05 -2.34 )                           | 1.51 (1.00 -2.28 )                  |
| <b>Hypertension stage<sup>7</sup></b>      |                      | P<0.001                        | P<0.001                                      | P<0.001                             |
| Stage I                                    | 142 / 730 (19.5%)    | 1                              | 1                                            | 1                                   |
| Stage II                                   | 134 / 342 (39.2%)    | 2.72 (2.04 -3.63 )             | 2.20 (1.62 -2.99 )                           | 2.15 (1.58 -2.93 )                  |
| Hypertension urgency                       | 67 / 127 (52.8%)     | 4.79 (3.22 -7.13 )             | 3.14 (2.06 -4.78 )                           | 3.10 (2.04 -4.71 )                  |
| <b>Self-report of diabetes<sup>8</sup></b> |                      | P=0.28                         | P=0.50                                       | P=0.56                              |
| No                                         | 339 / 1191 (28.5%)   | 1                              | 1                                            | 1                                   |
| Yes                                        | 4 / 8 (50.0%)        | 2.16 (0.53 -8.83 )             | 1.56 (0.43 -5.65 )                           | 1.48 (0.40 -5.52 )                  |

| Self-report of TB <sup>8</sup> |                    | P=0.81             | P=0.77             | P=0.48             |
|--------------------------------|--------------------|--------------------|--------------------|--------------------|
| No                             | 332 / 1156 (28.7%) | 1                  | 1                  | 1                  |
| Yes                            | 11 / 43 (25.6%)    | 0.92 (0.45 -1.86 ) | 1.12 (0.51 -2.49 ) | 1.34 (0.59 -3.04 ) |

<sup>1</sup>All characteristics are based on 2010 survey. <sup>2</sup>Hypertension defined as systolic BP  $\geq$  140mmHg or diastolic BP  $\geq$ 90 mmHg, in an average of 2 readings. <sup>3</sup>Weighted for non-response; weights calculated as the inverse probability of survey participation, in strata defined by age group, sex, education level and place of residence.

<sup>4</sup>Sociodemographic factors adjusted for age group, sex, marital status and employment. Location factors adjusted for age group, sex, marital status, employment, and distance from nearest clinic as continuous covariate. Clinical factors adjusted for age group, sex, marital status, employment, distance from nearest clinic, and hypertension stage. <sup>5</sup>Quartiles based on distribution in all individuals who were eligible for 2010 survey. Fit as continuous covariate; n (%) linked in each distance quartile shown for information only. <sup>6</sup>OR for linear trend in linkage with each 1 km increase in distance. <sup>7</sup>Stage I: Systolic BP 140–159 or diastolic BP 90–99; Stage II: Systolic BP 160–179 or diastolic BP 100–119; Hypertension urgency: Systolic BP  $\geq$ 180 or diastolic BP  $\geq$ 120. <sup>8</sup>Reports being diagnosed in the past 12m or currently on treatment.

**Supplementary Table 4.** Factors<sup>1</sup> associated with linkage to hypertension care within 5 years (2011 to 2015) after home-based diagnosis of hypertension<sup>2</sup> in 2010, among individuals who were previously undiagnosed and participated in a subsequent survey (N=1421) using inverse probability weighting to account for non-participation in the blood pressure screen

|                                            | Linked to care/N (%) | Crude OR (95% CI) <sup>3</sup> | Age- & sex-adjusted OR (95% CI) <sup>3</sup> | Adjusted OR (95% CI) <sup>3,4</sup> |
|--------------------------------------------|----------------------|--------------------------------|----------------------------------------------|-------------------------------------|
| <b>Sociodemographic factors</b>            |                      |                                |                                              |                                     |
| <b>Age group</b>                           |                      | P<0.001                        | P<0.001                                      | P<0.001                             |
| <30                                        | 25 / 248 (10.1%)     | 1                              | 1                                            | 1                                   |
| 35-44                                      | 75 / 284 (26.4%)     | 3.22 (1.97 -5.29)              | 2.69 (1.64 -4.43)                            | 2.93 (1.77 -4.87)                   |
| 45-59                                      | 211 / 430 (49.1%)    | 8.67 (5.48 -13.70)             | 7.50 (4.73 -11.89)                           | 8.05 (5.05 -12.84)                  |
| 60+                                        | 265 / 459 (57.7%)    | 12.37 (7.84 -19.53)            | 11.65 (7.35 -18.47)                          | 11.49 (7.25 -18.22)                 |
| <b>Sex</b>                                 |                      | P<0.001                        | P<0.001                                      | P<0.001                             |
| Male                                       | 92 / 394 (23.4%)     | 1                              | 1                                            | 1                                   |
| Female                                     | 484 / 1027 (47.1%)   | 3.06 (2.35 -3.99)              | 2.98 (2.25 -3.94)                            | 2.85 (2.15 -3.79)                   |
| <b>Marital status</b>                      |                      | P<0.001                        | P=0.66                                       | P=0.64                              |
| Single (never married)                     | 98 / 287 (34.1%)     | 1                              | 1                                            | 1                                   |
| Married/informal union                     | 298 / 817 (36.5%)    | 1.16 (0.88 -1.55)              | 1.04 (0.76 -1.44)                            | 1.07 (0.77 -1.48)                   |
| Widow/sep/divorced                         | 180 / 317 (56.8%)    | 2.78 (1.99 -3.87)              | 0.90 (0.61 -1.32)                            | 0.92 (0.62 -1.35)                   |
| <b>Education</b>                           |                      | P<0.001                        | P=0.55                                       | P=0.66                              |
| None                                       | 217 / 424 (51.2%)    | 1                              | 1                                            | 1                                   |
| Less than complete secondary               | 269 / 678 (39.7%)    | 0.60 (0.47 -0.76)              | 1.13 (0.85 -1.50)                            | 1.13 (0.86 -1.50)                   |
| Complete secondary/above                   | 90 / 319 (28.2%)     | 0.36 (0.26 -0.49)              | 0.98 (0.68 -1.41)                            | 1.05 (0.73 -1.53)                   |
| <b>Employed</b>                            |                      | P<0.001                        | P=0.007                                      | P=0.007                             |
| Yes                                        | 61 / 220 (27.7%)     | 1                              | 1                                            | 1                                   |
| No                                         | 515 / 1201 (42.9%)   | 2.04 (1.48 -2.81)              | 1.62 (1.14 -2.29)                            | 1.62 (1.14 -2.29)                   |
| <b>SES tertile</b>                         |                      | P=0.49                         | P=0.71                                       | P=0.58                              |
| Low                                        | 224 / 544 (41.2%)    | 1                              | 1                                            | 1                                   |
| Middle                                     | 163 / 431 (37.8%)    | 0.89 (0.68 -1.15)              | 0.95 (0.71 -1.27)                            | 0.97 (0.73 -1.30)                   |
| High                                       | 183 / 431 (42.5%)    | 1.04 (0.80 -1.35)              | 1.08 (0.81 -1.43)                            | 1.13 (0.85 -1.50)                   |
| <b>Location factors</b>                    |                      |                                |                                              |                                     |
| <b>Residence</b>                           |                      | P=0.07                         | P=0.89                                       | P=0.61                              |
| Urban                                      | 18 / 48 (37.5%)      | 1                              | 1                                            | 1                                   |
| Peri-urban                                 | 173 / 470 (36.8%)    | 1.03 (0.56 -1.92)              | 0.95 (0.50 -1.79)                            | 0.84 (0.44 -1.62)                   |
| Rural                                      | 385 / 903 (42.6%)    | 1.34 (0.73 -2.46)              | 1.01 (0.54 -1.88)                            | 0.75 (0.39 -1.46)                   |
| <b>Nearest clinic (km)<sup>5</sup></b>     |                      |                                |                                              |                                     |
| 0- <1.5                                    | 111 / 320 (34.7%)    |                                |                                              |                                     |
| 1.5-2.5                                    | 128 / 323 (39.6%)    | P=0.001                        | P=0.03                                       | P=0.05                              |
| >2.5-3.9                                   | 147 / 365 (40.3%)    | 1.10 (1.04 -1.17) <sup>6</sup> | 1.08 (1.01 -1.15) <sup>6</sup>               | 1.07 (1.00 -1.14) <sup>6</sup>      |
| >3.9                                       | 190 / 413 (46.0%)    |                                |                                              |                                     |
| <b>BMI category</b>                        |                      | P<0.001                        | P=0.004                                      | P=0.008                             |
| <25 kg/m <sup>2</sup>                      | 133 / 409 (32.5%)    | 1                              | 1                                            | 1                                   |
| 25 – <30 kg/m <sup>2</sup>                 | 99 / 269 (36.8%)     | 1.28 (0.92 -1.77)              | 0.88 (0.61 -1.26)                            | 0.90 (0.62 -1.31)                   |
| ≥30 kg/m <sup>2</sup>                      | 186 / 353 (52.7%)    | 2.44 (1.81 -3.29)              | 1.55 (1.10 -2.18)                            | 1.53 (1.08 -2.17)                   |
| <b>Hypertension stage<sup>7</sup></b>      |                      | P<0.001                        | P<0.001                                      | P<0.001                             |
| Stage I                                    | 264 / 863 (30.6%)    | 1                              | 1                                            | 1                                   |
| Stage II                                   | 215 / 415 (51.8%)    | 2.49 (1.95 -3.17)              | 2.01 (1.54 -2.62)                            | 2.12 (1.55 -2.89)                   |
| Hypertension urgency                       | 97 / 143 (67.8%)     | 5.02 (3.42 -7.37)              | 3.18 (2.10 -4.82)                            | 3.29 (2.01 -5.39)                   |
| <b>Self-report of diabetes<sup>8</sup></b> |                      | P=0.05                         | P=0.08                                       | P=0.32                              |
| No                                         | 568 / 1410 (40.3%)   | 1                              | 1                                            | 1                                   |
| Yes                                        | 8 / 11 (72.7%)       | 3.84 (0.98 -15.03)             | 3.09 (0.88 -10.81)                           | 5.18 (0.21 -128.15)                 |



| Self-report of TB <sup>8</sup> |                    | P=0.73             | P=0.86             | P=0.30             |
|--------------------------------|--------------------|--------------------|--------------------|--------------------|
| No                             | 560 / 1376 (40.7%) | 1                  | 1                  | 1                  |
| Yes                            | 16 / 45 (35.6%)    | 0.89 (0.48 -1.68 ) | 1.07 (0.49 -2.33 ) | 1.57 (0.67 -3.71 ) |

<sup>1</sup>All characteristics are based on 2010 survey. <sup>2</sup>Hypertension defined as systolic BP  $\geq$  140mmHg or diastolic BP  $\geq$ 90 mmHg, in an average of 2 readings. <sup>3</sup>Weighted for non-response; weights calculated as the inverse probability of survey participation, in strata defined by age group, sex, education level and place of residence.

<sup>4</sup>Sociodemographic factors adjusted for age group, sex, and employment. Location factors adjusted for age group, sex, employment, and distance from nearest clinic as continuous covariate. Clinical factors adjusted for age group, sex, employment, distance from nearest clinic, hypertension stage, and BMI. <sup>5</sup>Quartiles based on distribution in all individuals who were eligible for 2010 survey. Fit as continuous covariate; n (%) linked in each distance quartile shown for information only. <sup>6</sup>OR for linear trend in linkage with each 1 km increase in distance. <sup>7</sup>Stage I: Systolic BP 140–159 or diastolic BP 90–99; Stage II: Systolic BP 160–179 or diastolic BP 100–119; Hypertension urgency: Systolic BP  $\geq$ 180 or diastolic BP  $\geq$ 120. <sup>8</sup>Reports being diagnosed in the past 12m or currently on treatment.

For peer review only

**Supplementary Table 5.** Factors<sup>1</sup> associated with linkage to hypertension care within 5 years (2011 to 2015) after home-based diagnosis of hypertension<sup>2</sup> in 2010, among individuals who were previously undiagnosed and participated in a subsequent survey (N=1421)

|                                        | Linked to care/N (%) | Crude OR (95% CI) <sup>3</sup>  | Adjusted OR (95% CI) <sup>3,4</sup> | Adjusted OR (95% CI) <sup>3,5</sup> |
|----------------------------------------|----------------------|---------------------------------|-------------------------------------|-------------------------------------|
| <b>Sociodemographic factors</b>        |                      |                                 |                                     |                                     |
| <b>Age group</b>                       |                      | P<0.001                         | P<0.001                             | P<0.001                             |
| <30                                    | 25 / 248 (10.1%)     | 1                               | 1                                   | 1                                   |
| 35-44                                  | 75 / 284 (26.4%)     | 3.22 (1.97 -5.29 )              | 2.43 (1.47 -4.01 )                  | 2.61 (1.56 -4.34 )                  |
| 45-59                                  | 211 / 430 (49.1%)    | 8.67 (5.48 -13.70)              | 6.58 (4.13 -10.47)                  | 6.96 (4.35 -11.14)                  |
| 60+                                    | 265 / 459 (57.7%)    | 12.37 (7.84 -19.53)             | 10.23 (6.44 -16.25)                 | 10.11 (6.37 -16.06)                 |
| <b>Sex</b>                             |                      | P<0.001                         | P<0.001                             | P<0.001                             |
| Male                                   | 92 / 394 (23.4%)     | 1                               | 1                                   | 1                                   |
| Female                                 | 484 / 1027 (47.1%)   | 3.06 (2.35 -3.99 )              | 2.54 (1.91 -3.39 )                  | 2.46 (1.84 -3.30 )                  |
| <b>Times participated</b>              |                      |                                 |                                     |                                     |
| Once                                   | 61 / 321 (19.0%)     |                                 |                                     |                                     |
| Twice                                  | 119 / 335 (35.5%)    | P<0.001                         | P<0.001                             | P<0.001                             |
| 3 times                                | 160 / 327 (48.9%)    | 1.57 (1.44 -1.71 ) <sup>6</sup> | 1.40 (1.27 -1.53 ) <sup>6</sup>     | 1.39 (1.26 -1.52 ) <sup>6</sup>     |
| 4 times                                | 147 / 287 (51.2%)    |                                 |                                     |                                     |
| 5 times                                | 89 / 151 (58.9%)     |                                 |                                     |                                     |
| <b>Marital status</b>                  |                      | P<0.001                         | P=0.60                              | P=0.55                              |
| Single (never married)                 | 98 / 287 (34.1%)     | 1                               | 1                                   | 1                                   |
| Married/informal union                 | 298 / 817 (36.5%)    | 1.16 (0.88 -1.55 )              | 1.14 (0.82 -1.60 )                  | 1.16 (0.83 -1.63 )                  |
| Widow/sep/divorced                     | 180 / 317 (56.8%)    | 2.78 (1.99 -3.87 )              | 1.00 (0.67 -1.48 )                  | 1.01 (0.68 -1.50 )                  |
| <b>Education</b>                       |                      | P<0.001                         | P=0.74                              | P=0.67                              |
| None                                   | 217 / 424 (51.2%)    | 1                               | 1                                   | 1                                   |
| Less than complete secondary           | 269 / 678 (39.7%)    | 0.60 (0.47 -0.76 )              | 1.12 (0.84 -1.49 )                  | 1.12 (0.84 -1.50 )                  |
| Complete secondary/above               | 90 / 319 (28.2%)     | 0.36 (0.26 -0.49 )              | 1.09 (0.75 -1.59 )                  | 1.16 (0.79 -1.69 )                  |
| <b>Employed</b>                        |                      | P<0.001                         | P=0.03                              | P=0.03                              |
| Yes                                    | 61 / 220 (27.7%)     | 1                               | 1                                   | 1                                   |
| No                                     | 515 / 1201 (42.9%)   | 2.04 (1.48 -2.81 )              | 1.48 (1.04 -2.10 )                  | 1.48 (1.04 -2.10 )                  |
| <b>SES tertile</b>                     |                      | P=0.49                          | P=0.68                              | P=0.56                              |
| Low                                    | 224 / 544 (41.2%)    | 1                               | 1                                   | 1                                   |
| Middle                                 | 163 / 431 (37.8%)    | 0.89 (0.68 -1.15 )              | 0.98 (0.73 -1.32 )                  | 1.00 (0.74 -1.35 )                  |
| High                                   | 183 / 431 (42.5%)    | 1.04 (0.80 -1.35 )              | 1.11 (0.83 -1.48 )                  | 1.15 (0.86 -1.54 )                  |
| <b>Location factors</b>                |                      |                                 |                                     |                                     |
| <b>Residence</b>                       |                      | P=0.07                          | P=0.63                              | P=0.61                              |
| Urban                                  | 18 / 48 (37.5%)      | 1                               | 1                                   | 1                                   |
| Peri-urban                             | 173 / 470 (36.8%)    | 1.03 (0.56 -1.92 )              | 0.82 (0.43 -1.57 )                  | 0.76 (0.40 -1.48 )                  |
| Rural                                  | 385 / 903 (42.6%)    | 1.34 (0.73 -2.46 )              | 0.93 (0.49 -1.74 )                  | 0.85 (0.45 -1.61 )                  |
| <b>Nearest clinic (km)<sup>7</sup></b> |                      |                                 |                                     |                                     |
| 0- <1.5                                | 111 / 320 (34.7%)    |                                 |                                     |                                     |
| 1.5-2.5                                | 128 / 323 (39.6%)    | P=0.001                         | P=0.06                              | P=0.10                              |
| >2.5-3.9                               | 147 / 365 (40.3%)    | 1.10 (1.04 -1.17 ) <sup>8</sup> | 1.07 (1.00 -1.14 ) <sup>8</sup>     | 1.06 (0.99 -1.13 ) <sup>8</sup>     |
| >3.9                                   | 190 / 413 (46.0%)    |                                 |                                     |                                     |
| <b>BMI category</b>                    |                      | P<0.001                         | P=0.003                             | P=0.007                             |
| <25 kg/m <sup>2</sup>                  | 133 / 409 (32.5%)    | 1                               | 1                                   | 1                                   |
| 25 – <30 kg/m <sup>2</sup>             | 99 / 269 (36.8%)     | 1.28 (0.92 -1.77 )              | 0.88 (0.61 -1.28 )                  | 0.89 (0.61 -1.30 )                  |
| ≥30 kg/m <sup>2</sup>                  | 186 / 353 (52.7%)    | 2.44 (1.81 -3.29 )              | 1.58 (1.11 -2.25 )                  | 1.54 (1.07 -2.22 )                  |
| <b>Hypertension stage<sup>9</sup></b>  |                      | P<0.001                         | P<0.001                             | P<0.001                             |
| Stage I                                | 264 / 863 (30.6%)    | 1                               | 1                                   | 1                                   |
| Stage II                               | 215 / 415 (51.8%)    | 2.49 (1.95 -3.17 )              | 2.19 (1.67 -2.88 )                  | 2.36 (1.71 -3.26 )                  |
| Hypertension urgency                   | 97 / 143 (67.8%)     | 5.02 (3.42 -7.37 )              | 3.44 (2.25 -5.25 )                  | 3.74 (2.25 -6.20 )                  |

|                                             |     |                    |                    |                     |
|---------------------------------------------|-----|--------------------|--------------------|---------------------|
| <b>Self-report of diabetes<sup>10</sup></b> |     | P=0.05             | P=0.03             | P=0.28              |
| 1                                           | No  | 568 / 1410 (40.3%) | 1                  | 1                   |
| 2                                           | Yes | 8 / 11 (72.7%)     | 3.84 (0.98 -15.03) | 5.64 (0.25 -126.50) |
| <b>Self-report of TB<sup>10</sup></b>       |     | P=0.73             | P=0.91             | P=0.56              |
| 4                                           | No  | 560 / 1376 (40.7%) | 1                  | 1                   |
| 5                                           | Yes | 16 / 45 (35.6%)    | 0.89 (0.48 -1.68 ) | 1.31 (0.52 -3.27 )  |

<sup>1</sup>All characteristics are based on 2010 survey. <sup>2</sup>Hypertension defined as systolic BP  $\geq$  140mmHg or diastolic BP  $\geq$ 90 mmHg, in an average of 2 readings. <sup>3</sup>Weighted for non-response; weights calculated as the inverse probability of survey participation, in strata defined by age group, sex, education level and place of residence. <sup>4</sup>Adjusted for age, sex and number of times participated in subsequent surveys as a continuous covariate. <sup>5</sup>Sociodemographic factors adjusted for age group, sex, number of times in subsequent surveys, and employment. Location factors adjusted for age group, sex, number of times in subsequent surveys, and employment. Clinical factors adjusted for age group, sex, number of times in subsequent surveys, employment, hypertension stage, and BMI. <sup>6</sup>OR for linear trend in reported linkage with each unit increase in survey participation. <sup>7</sup>Quartiles based on distribution in all individuals who were eligible for 2010 survey. Fit as continuous covariate; n (%) linked in each distance quartile shown for information only. <sup>8</sup>OR for linear trend in linkage with each 1 km increase in distance. <sup>9</sup>Stage I: Systolic BP 140–159 or diastolic BP 90–99; Stage II: Systolic BP 160–179 or diastolic BP 100–119; Hypertension urgency: Systolic BP  $\geq$ 180 or diastolic BP  $\geq$ 120. <sup>10</sup>Reports being diagnosed in the past 12m or currently on treatment.

For peer review only

STROBE Statement—Checklist of items that should be included in reports of *cohort studies*

|                          | Item No | Recommendation                                                                                                                                                                       | Page | Comments        |
|--------------------------|---------|--------------------------------------------------------------------------------------------------------------------------------------------------------------------------------------|------|-----------------|
| Title and abstract       | 1       | (a) Indicate the study's design with a commonly used term in the title or the abstract                                                                                               | 1    |                 |
|                          |         | (b) Provide in the abstract an informative and balanced summary of what was done and what was found                                                                                  | 2    |                 |
| <b>Introduction</b>      |         |                                                                                                                                                                                      |      |                 |
| Background/rationale     | 2       | Explain the scientific background and rationale for the investigation being reported                                                                                                 | 4    | Lines 2-23      |
| Objectives               | 3       | State specific objectives, including any prespecified hypotheses                                                                                                                     | 4-5  | Lines 25-32     |
| <b>Methods</b>           |         |                                                                                                                                                                                      |      |                 |
| Study design             | 4       | Present key elements of study design early in the paper                                                                                                                              | 5    | Lines 36-43     |
| Setting                  | 5       | Describe the setting, locations, and relevant dates, including periods of recruitment, exposure, follow-up, and data collection                                                      | 5    | Lines 36-43     |
| Participants             | 6       | (a) Give the eligibility criteria, and the sources and methods of selection of participants. Describe methods of follow-up                                                           | 6    | Lines 70-79     |
|                          |         | (b) For matched studies, give matching criteria and number of exposed and unexposed                                                                                                  | N/A  |                 |
| Variables                | 7       | Clearly define all outcomes, exposures, predictors, potential confounders, and effect modifiers. Give diagnostic criteria, if applicable                                             | 5-6  | Lines 45-67     |
| Data sources/measurement | 8*      | For each variable of interest, give sources of data and details of methods of assessment (measurement). Describe comparability of assessment methods if there is more than one group | 5-6  | Lines 45-67     |
| Bias                     | 9       | Describe any efforts to address potential sources of bias                                                                                                                            | 7    | Lines 94 - 103  |
| Study size               | 10      | Explain how the study size was arrived at                                                                                                                                            | 9    | Lines 129 - 141 |
| Quantitative variables   | 11      | Explain how quantitative variables were handled in the analyses. If applicable, describe which groupings were chosen and why                                                         | 6    | Lines 69 - 79   |
| Statistical methods      | 12      | (a) Describe all statistical methods, including those used to control for confounding                                                                                                | 6-7  | Lines 69 - 103  |
|                          |         | (b) Describe any methods used to examine subgroups and interactions                                                                                                                  | 6    | Lines 73 – 76   |
|                          |         | (c) Explain how missing data were addressed                                                                                                                                          | 7    | Lines 94 - 103  |
|                          |         | (d) If applicable, explain how loss to follow-up was addressed                                                                                                                       | N/A  |                 |
|                          |         | (e) Describe any sensitivity analyses                                                                                                                                                | 7    | Lines 94 - 103  |
| <b>Results</b>           |         |                                                                                                                                                                                      |      |                 |
| Participants             | 13*     | (a) Report numbers of individuals at each stage                                                                                                                                      | 8-9  | Lines 113 - 141 |

|                          |     |                                                                                                                                                                                                              |      |                                                                                                         |
|--------------------------|-----|--------------------------------------------------------------------------------------------------------------------------------------------------------------------------------------------------------------|------|---------------------------------------------------------------------------------------------------------|
|                          |     | of study—eg numbers potentially eligible, examined for eligibility, confirmed eligible, included in the study, completing follow-up, and analysed                                                            |      |                                                                                                         |
|                          |     | (b) Give reasons for non-participation at each stage                                                                                                                                                         | 8-9  | Lines 113 - 141                                                                                         |
|                          |     | (c) Consider use of a flow diagram                                                                                                                                                                           |      | Figure 1                                                                                                |
| Descriptive data         | 14* | (a) Give characteristics of study participants (eg demographic, clinical, social) and information on exposures and potential confounders                                                                     | 9    | Lines 139 - 149                                                                                         |
|                          |     | (b) Indicate number of participants with missing data for each variable of interest                                                                                                                          | N/A  | No data was missing for participants who completed surveys                                              |
|                          |     | (c) Summarise follow-up time (eg, average and total amount)                                                                                                                                                  | 9    | Lines 138 - 149                                                                                         |
| Outcome data             | 15* | Report numbers of outcome events or summary measures over time                                                                                                                                               | 9-10 | Lines 151 - 161                                                                                         |
| Main results             | 16  | (a) Give unadjusted estimates and, if applicable, confounder-adjusted estimates and their precision (eg, 95% confidence interval). Make clear which confounders were adjusted for and why they were included | 10   | Lines 163 - 180                                                                                         |
|                          |     | (b) Report category boundaries when continuous variables were categorized                                                                                                                                    |      | Table 2                                                                                                 |
|                          |     | (c) If relevant, consider translating estimates of relative risk into absolute risk for a meaningful time period                                                                                             | 9-10 | Lines 151 – 161 (we report absolute prevalence of linkage prior to our multivariable model estimations) |
| Other analyses           | 17  | Report other analyses done—eg analyses of subgroups and interactions, and sensitivity analyses                                                                                                               | 10   | Lines 177 – 180, Supplementary Tables                                                                   |
| <b>Discussion</b>        |     |                                                                                                                                                                                                              |      |                                                                                                         |
| Key results              | 18  | Summarise key results with reference to study objectives                                                                                                                                                     | 11   | Lines 183-191                                                                                           |
| Limitations              | 19  | Discuss limitations of the study, taking into account sources of potential bias or imprecision. Discuss both direction and magnitude of any potential bias                                                   | 13   | Lines 240-248                                                                                           |
| Interpretation           | 20  | Give a cautious overall interpretation of results considering objectives, limitations, multiplicity of analyses, results from similar studies, and other relevant evidence                                   | 13   | Lines 150-254                                                                                           |
| Generalisability         | 21  | Discuss the generalisability (external validity) of the study results                                                                                                                                        | 13   | Lines 248-249                                                                                           |
| <b>Other information</b> |     |                                                                                                                                                                                                              |      |                                                                                                         |
| Funding                  | 22  | Give the source of funding and the role of the funders for the present study and, if applicable, for the original study on which the present                                                                 | 1    | Funding statement                                                                                       |

---

article is based

---

\*Give information separately for exposed and unexposed groups.

**Note:** An Explanation and Elaboration article discusses each checklist item and gives methodological background and published examples of transparent reporting. The STROBE checklist is best used in conjunction with this article (freely available on the Web sites of PLoS Medicine at <http://www.plosmedicine.org/>, Annals of Internal Medicine at <http://www.annals.org/>, and Epidemiology at <http://www.epidem.com/>). Information on the STROBE Initiative is available at <http://www.strobe-statement.org>.

For peer review only

# BMJ Open

## Linkage to primary care after home-based blood pressure screening in rural Kwazulu-Natal, South Africa: A population-based cohort study

|                                 |                                                                                                                                                                                                                                                                                                                                                                                                                                                                                                                                                                                                                                                                                                                                                                                 |
|---------------------------------|---------------------------------------------------------------------------------------------------------------------------------------------------------------------------------------------------------------------------------------------------------------------------------------------------------------------------------------------------------------------------------------------------------------------------------------------------------------------------------------------------------------------------------------------------------------------------------------------------------------------------------------------------------------------------------------------------------------------------------------------------------------------------------|
| Journal:                        | <i>BMJ Open</i>                                                                                                                                                                                                                                                                                                                                                                                                                                                                                                                                                                                                                                                                                                                                                                 |
| Manuscript ID                   | bmjopen-2018-023369.R1                                                                                                                                                                                                                                                                                                                                                                                                                                                                                                                                                                                                                                                                                                                                                          |
| Article Type:                   | Research                                                                                                                                                                                                                                                                                                                                                                                                                                                                                                                                                                                                                                                                                                                                                                        |
| Date Submitted by the Author:   | 01-Aug-2018                                                                                                                                                                                                                                                                                                                                                                                                                                                                                                                                                                                                                                                                                                                                                                     |
| Complete List of Authors:       | Siedner, Mark; Massachusetts General Hospital, Medicine; Harvard Medical School,<br>Baisley, Kathy; London School of Hygiene and Tropical Medicine, Epidemiology and Population Health<br>Orne-Gliemann, Joanna; University of Bordeaux<br>Pillay, Deenan; Africa Health Research Institute; University of College London<br>Koole, Olivier; Africa Health Research Institute<br>Wong, Emily; Massachusetts General Hospital<br>Matthews, Philippa; Africa Health Research Institute<br>Tanser, Frank; School of Nursing and Public Health, University of KwaZulu-Natal ; Africa Health Research Institute<br>Herbst, Kobus; Africa Health Research Institute<br>Barnighausen, Till; Africa Health Research Institute<br>Bachmann, Max; UEA, Population Health and Primary Care |
| <b>Primary Subject Heading</b>: | Cardiovascular medicine                                                                                                                                                                                                                                                                                                                                                                                                                                                                                                                                                                                                                                                                                                                                                         |
| Secondary Subject Heading:      | Global health, Health services research                                                                                                                                                                                                                                                                                                                                                                                                                                                                                                                                                                                                                                                                                                                                         |
| Keywords:                       | Hypertension < CARDIOLOGY, sub-Saharan Africa, Linkage to care, Population health                                                                                                                                                                                                                                                                                                                                                                                                                                                                                                                                                                                                                                                                                               |
|                                 |                                                                                                                                                                                                                                                                                                                                                                                                                                                                                                                                                                                                                                                                                                                                                                                 |

SCHOLARONE™  
Manuscripts

1 Linkage to primary care after home-based blood pressure screening in rural Kwazulu-Natal, South Africa: A  
2 population-based cohort study

3  
4 **Authors:**

5 Mark J. Siedner\*<sup>1,2,3</sup>

6 Kathy Baisley<sup>3,4</sup>

7 Joanna Orne-Gliemann<sup>5</sup>

8 Deenan Pillay<sup>3,6</sup>

9 Olivier Koole<sup>3,4</sup>

10 Emily B. Wong<sup>1,2,3</sup>

11 Philippa Matthews<sup>3</sup>

12 Frank Tanser<sup>3</sup>

13 Kobus Herbst<sup>3</sup>

14 Till Barnighausen<sup>3,6,7,8</sup>

15 Max Bachmann<sup>9</sup>

16  
17 \*Corresponding Author for Inquiries:

18 Mark J. Siedner

19 Massachusetts General Hospital Global Health

20 125 Nashua Street

21 Boston, MA 02114 USA

22 T: +1-617-726-4686; F: +1-617-724-1637

23 [msiedner@mgh.harvard.edu](mailto:msiedner@mgh.harvard.edu)

24  
25  
26 **Affiliations:**

27 <sup>1</sup>Massachusetts General Hospital, Boston, USA

28 <sup>2</sup>Harvard Medical School, Boston, USA

29 <sup>3</sup>Africa Health Research Institute, KwaZulu-Natal, SA

30 <sup>4</sup>London School of Tropical Medicine and Hygiene, London, UK

31 <sup>5</sup>University of Bordeaux, ISPED, INSERM, Bordeaux Population Health Research Center, UMR 1219,  
32 Bordeaux, France

33 <sup>6</sup>University College London, London, UK

34 <sup>7</sup>University of Heidelberg, Germany

35 <sup>8</sup>Harvard School of Public Health, Boston, USA

36 <sup>9</sup>University of East Anglia, Norwich, UK

37  
38  
39 **Funding:**

40 The Africa Health Research Institute receives funding from the United Kingdom Wellcome Trust grant  
41 082384/Z/07/Z. MJS receives funding from the National Institutes of Health (K23 MH099916, P30  
42 30AI060354). EBW receives funding from the National Institutes of Health (K08 AI118538). The population  
43 cohort is partly funded by the South African Department of Science and Technology through the SA-MRC  
44 hosted South African Population Research Infrastructure Network.

45  
46 **Conflicts of Interest:** All authors report no conflicts of interest



**48 ABSTRACT**

1 49  
2 50 **Objectives:** The expanding burden of non-communicable diseases (NCDs) globally will require novel public  
3 51 health strategies. Community-based screening has been promoted to augment efficiency of diagnostic  
4 52 services, but few data are available on the downstream impact of such programs. We sought to assess the  
5 53 impact of a home-based blood pressure screening program on linkage to hypertension care in rural South  
6 54 Africa.

7 55  
8 56 **Setting:** We conducted home-based blood pressure screening in a population cohort in rural KwaZulu-  
9 57 Natal, using the WHO STEPS protocol.

10 58  
11 59 **Participants:** Individuals meeting criteria for raised blood pressure ( $\geq 140$  systolic or  $\geq 90$  diastolic averaged  
12 60 over two readings) were referred to local health clinics, and included in this analysis. We defined linkage to  
13 61 care based on self-report of presentation to clinic for hypertension during the next two years of cohort  
14 62 observation. We estimated the population proportion of successful linkage to care with inverse probability  
15 63 sampling weights, and fit multivariable logistic regression models to identify predictors of linkage following  
16 64 a positive hypertension screen.

17 65  
18 66 **Results:** Of 11,694 individuals screened, 14.6% ( $n=1,706$ ) were newly diagnosed with elevated pressure.  
19 67 26.9% (95%CI 24.5-29.4%) of those sought hypertension care in the following two years, and 38.1% (95%CI  
20 68 35.6-40.7%) did so within five years. Women (aOR 2.41, 95%CI 1.68–3.45), those of older age (aOR 11.49,  
21 69 95%CI 5.87–22.46, for 45-59 years versus  $<30$ ), and those unemployed (aOR 1.71, 95%CI 1.10–2.65) were  
22 70 more likely to have linked to care.

23 71  
24 72 **Conclusions:** Linkage to care after home-based identification of elevated blood pressure was rare in rural  
25 73 South Africa, particularly among younger individuals, men, and the employed. Improved understanding of  
26 74 barriers and facilitators to NCD care is needed to improve the effectiveness of blood pressure screening in  
27 75 the region.

28 76  
29 77  
30 78 **Key Words:**

31 79 Non-communicable diseases, community health, hypertension, South Africa, linkage to care

32 80  
33 81 **Strengths and Limitations of this Study**

- 34 82
- 35 83 • Applies a longitudinal population cohort study design with a large sample size to assess linkage to
  - 36 84 hypertension care after a home-based screening for elevated blood pressure
  - 37 85 • Assesses a population in rural sub-Saharan Africa who are noted to have high prevalence of
  - 38 86 hypertension but with little corresponding data about linkage to care after diagnosis
  - 39 87 • Identifies low rates of linkage to care after home-based blood pressure screening in this population,
  - 40 88 and key factors associated with poor linkage including male sex, younger age, and being employed
  - 41 89 • Limitations include low rates of participation in the home-based screening program and incomplete
  - 42 90 follow-up, as well as self-reported linkage to care as an outcome definition

**91 BACKGROUND**

92 Over two in three deaths worldwide are attributed to non-communicable diseases (NCDs).<sup>1</sup> Although  
93 precise measurement of cause-specific mortality in much of the developing world remains a challenge,  
94 some estimates suggest that the majority of NCD deaths now occur in low and middle-income countries.<sup>2</sup>  
95 In South Africa, for example, the World Health Organization estimates that half of deaths are due to NCDs,  
96 and approximately 25% of the population will suffer a premature death due to them.<sup>3</sup>

97  
98 Consequently, responding to the NCD epidemic in low and middle-income countries is both a major  
99 challenge and stated priority of the public health community.<sup>4</sup> NCD morbidity and mortality can be  
100 substantially reduced through effective primary and secondary prevention measures targeting risk factors  
101 such as smoking, high blood pressure, diabetes, diet and physical activity.<sup>5</sup> Hypertension, which can be  
102 controlled through cost-effective lifestyle and pharmacotherapy interventions, is estimated to account for  
103 over 50% of the population attributable fraction of stroke in the African region.<sup>6</sup> Yet, in South Africa,  
104 national population surveys have estimated that over one quarter of South Africans adults have raised  
105 blood pressure, but only approximately one in three of them has received treatment.<sup>7</sup>

106  
107 The South African Department of Health has outlined strategic NCD goals, which highlight the role for  
108 prevention of NCDs and the importance of a community-based focus.<sup>8</sup> One specific strategy includes  
109 integrating HIV and NCD screening programs and broadening access to diagnostic and treatment in the  
110 community and rural areas. Community-based NCD screening through health fairs and use of community  
111 health workers has gained traction recently as a means to efficiently screen large populations of individuals  
112 for multiple co-morbidities.<sup>9 10</sup> Whether such endeavors lead to successful linking of individuals to  
113 appropriate NCD care is not well established, and is an important question for the field.

114  
115 In 2010, we conducted a home-based assessment of blood pressure in approximately 12,000 people in a  
116 demographic health surveillance (DHS) site in KwaZulu Natal. We referred individuals with raised blood

117 pressure and not already receiving hypertension treatment to local government clinics for repeat  
1 measurement and ongoing hypertension care. We assessed linkage to care during future years of the  
2 118 measurement and ongoing hypertension care. We assessed linkage to care during future years of the  
3  
4 119 home-based DHS survey. Our primary aims were to determine the probability of clinical engagement  
5  
6 120 within two years after home-based screening and referral, and to identify predictors of failure to link to  
7  
8 121 care. Our over-arching aim was to inform public health programmers on the feasibility of community-  
9  
10 122 based blood pressure screening as an entry point into NCD care in this setting.  
11  
12  
13  
14 123

## 16 124 **METHODS**

### 18 125 *Study design, setting, and participants*

20 126 The African Health Research Institute (AHRI) (formerly the Africa Centre for Health and Population Studies)  
21 127 is a Wellcome Trust funded research institute in South Africa. Since 2000, they have conducted a  
22  
23 128 population cohort study of all adults in a catchment area of 438 km<sup>2</sup> in rural uMkanyakude District,  
24  
25 129 northern KwaZulu-Natal, covering a total population of approximately 100,000 individuals.<sup>11</sup> Households  
26  
27 130 are surveyed 2–3 times per year, to collect information on birth, deaths and migration patterns for all  
28  
29 131 household members, including non-residents. Since 2003, resident household members ≥15 years have  
30  
31 132 been invited to participate in an annual home-based individual survey, which collects data on  
32  
33 133 sociodemographics and general health information.  
34  
35  
36  
37  
38  
39  
40

### 41 135 *Blood pressure screening and referral methods*

42 136 In 2010, all individuals who participated in the home-based survey were also offered a physical  
43  
44 137 examination to determine weight, height and blood pressure, using the WHO STEPS protocol.<sup>12</sup> Blood  
45  
46 138 pressure was measured using Omron automated blood pressure monitors (Omron Global, Kyoto Japan).  
47  
48 139 Blood pressure was measured after 15 minutes of resting in a seated position. We collected three  
49  
50 140 measurements, each five minutes apart, with the mean of the last two measurements used to identify  
51  
52 141 those with elevated blood pressure. A positive hypertension screen was defined as a mean systolic blood  
53  
54 142 pressure ≥140 mmHg and/or diastolic blood pressure ≥90 mmHg.<sup>13</sup> All individuals were given a copy of  
55  
56  
57  
58  
59

143 their blood pressure results, along with body mass index, on a health results card. Those with elevated  
144 blood pressure were counselled by study staff to seek care at their preferred local public health clinic with  
145 a copy of their screening results.

146

#### 147 *Outcome assessment*

148 For our primary outcome of interest, we defined successful linkage to care for hypertension as self-  
149 reported linkage within two years of a positive home-based hypertension screen. To assess this outcome,  
150 we used data from the two subsequent, annual home-based health surveys in 2011 and 2012. All  
151 participants who took part in the initial blood pressure screening survey were members of the  
152 demographic health and surveillance site study population, and are seen annually at home for data  
153 collection. In each annual health survey, respondents were asked if: 1) they have been diagnosed with  
154 hypertension in the past 12 months; 2) if they have ever received hypertension treatment; and 3) if they  
155 are currently being treated for hypertension. We defined successful linkage to care by a positive response  
156 to any of these three questions in either 2011 or 2012. As secondary outcomes of interest, we also  
157 examined 1) linkage to hypertension care within five years (as opposed to two), defined as a positive  
158 response to any of the same three questions in the annual health surveys during 2011-2015 and 2)  
159 confirmation of hypertension care seven years after the screening, as evidenced by clinical records from all  
160 public health clinics in the catchment area in 2017, the first year linked clinical data was linked to the  
161 population cohort database.

162

#### 163 *Statistical methods*

164 We included in this analysis individuals who had a positive hypertension screen in the home-based 2010  
165 survey, and who reported no previous diagnosis of hypertension or hypertension treatment. We first  
166 summarized sociodemographic characteristics of eligible adults who had blood pressure measurements in  
167 the 2010 survey. We then estimated population-level prevalence of linkage to hypertension care in the  
168 two years after the screening program, both overall and stratified by sex and age, with the use of inverse

169 probability weights (IPWs) of the probability of participating in the hypertension screening. We used IPWs  
170 to make the results generalizable to the entire 2010 sample. To calculate the weights, we fit a logistic  
171 regression model with completion of blood pressure screening in 2010 as the outcome of interest and  
172 included age strata, sex, education level and place of residence (urban, peri-urban, or rural) as predictors,  
173 based on information routinely collected in the household-level survey.

174

175 We then fit logistic regression models to estimate odds ratios (OR) and 95% confidence intervals (CI) for  
176 factors independently associated with linkage to hypertension care within two years of a positive home-  
177 based hypertension screen. Potential determinants of linkage were examined at three levels:  
178 sociodemographic factors (age, sex, educational attainment, employment status and socioeconomic  
179 status, which was estimated using principal components analysis of household asset ownership following  
180 the method of Filmer and Pritchett<sup>14</sup>); geographical factors (distance from clinic, urban versus rural  
181 residency); and clinical factors (body mass index, elevated blood pressure severity [defined using  
182 hypertension stages as a) stage I: systolic 140-160 and diastolic 80-100; b) stage II: systolic 160-<180 or  
183 diastolic 100-<120; or c) hypertensive urgency: systolic  $\geq 180$  or diastolic  $\geq 120$ ], self-report of diabetes, self-  
184 report of tuberculosis)<sup>15</sup>. Self-reported data on HIV diagnosis was not collected in the survey, so could not  
185 be included in the analysis. Sociodemographic and clinical factors whose age- and sex-adjusted association  
186 with linkage was significant at  $p < 0.10$  were included in a final adjusted multivariable model. Distance from  
187 the nearest clinic was analyzed as a continuous covariate. In order to allow for non-linear relationships  
188 between distance and linkage to care, we used fractional polynomial functions.<sup>16</sup>

189

190 We tested the robustness of our findings using several sensitivity analyses. First, we changed our outcome  
191 from self-reported linkage to care in 2011 or 2012 to 1) self-reported linkage to care at any time between  
192 2011-2015, and 2) confirmation of a clinic appointment for hypertension in 2017 at any of the 11 local  
193 public sector clinics, among those who remained a resident in the catchment area. Next, we compared  
194 characteristics of eligible individuals who did and did not complete blood pressure screening in 2010. Next,

195 we compared characteristics of those who participated in a subsequent health survey and those who did  
196 not, either because of refusal, out-migration, or death. Finally, we conducted sensitivity analyses in which  
197 we: 1) used IPWs of screening in the models; and 2) added a covariate to indicate the number of individual  
198 health surveys participated in during 2011-2015. Data were entered and verified in an SQL database, and  
199 were analyzed using Stata 14 (StataCorp, College Station, TX).

200

### 201 *Human Studies Considerations*

202 Ethical approval for the demographic surveillance study and analyses of these data was granted by the  
203 Biomedical Research Ethics Committee of the University of KwaZulu-Natal, South Africa. Separate  
204 informed consent was given for the demographics survey, the blood pressure screening, and the clinic  
205 records abstraction.

206

### 207 *Patient and Public Involvement*

208 Patients were not involved in the design of this study. This analysis was designed by study investigators at  
209 the Africa Health Research Institute intent on leveraging prior home-based screening protocols to inform  
210 and optimize future community-based research, and particularly to improve the public health impact of  
211 such activities. The results of this study were presented to the South African Department of Health Non-  
212 Communicable Diseases Unit and will be disseminated to the community during the monthly scheduled  
213 Africa Health Research Institute community road shows.

214

## 215 **RESULTS**

### 216 *Survey participants*

217 A total of 37,693 potentially eligible adults were in the sampling frame. Of these, approximately one  
218 quarter (8,589, 22.8%) were not available due to out-migration, death or inability to consent and another  
219 2,920 (7.7%) could not be contacted (Figure 1). Of the remaining 26,184 individuals who were contacted  
220 and eligible for the home-based DHS survey in 2010, 11,814 (45.1%) consented to participate in the

221 general health survey and 11,694 (44.7%) had valid blood pressure measurements. Women, older  
222 individuals, and those of lower socioeconomic position and education were more likely to participate in  
223 the survey (Supplementary Table 1).

224  
225 The majority of participants with a blood pressure measurement were women (n=8,241, 70.5%, Table 1).  
226 Median age was 25 years (interquartile range [IQR] 18–47 years) for men and 38 years (IQR 23–55 years)  
227 for women. The majority of participants (n=7,464, 63.8%) resided in a rural setting, and less than one  
228 quarter (n=2,642, 22.6%) lived within 1.5 kilometers of the nearest clinic. Few participants (n=1,779,  
229 15.2%) were currently employed.

230

### 231 *Screening for hypertension*

232 Approximately one quarter (n=3,074, 26.2%) of participants were found to have elevated pressure during  
233 the home-based blood pressure screening, of whom 1,368 (44.5%) reported having been previously  
234 diagnosed or currently on treatment. Of those who had been previously diagnosed or in hypertension care,  
235 1,169 (85.5%) were currently on hypertension treatment. Participants who were not previously aware of  
236 their condition were significantly younger, and more likely to be men, married, employed, have a higher  
237 level of education, and be living in peri-urban areas than those who had been previously diagnosed or on  
238 treatment (Table 1). However, there was no evidence of a difference between the two groups in the  
239 distance from their nearest clinic.

240

### 241 *Analytic Sample*

242 A total of 1,199 individuals (70.3%) who were not previously aware of having elevated blood pressure  
243 participated in a second general health survey within two years of being screened (that is, in 2011 or  
244 2012), and were included in the primary analysis of factors associated with linkage to hypertension care.  
245 Compared with the 507 individuals who did not participate in 2011 or 2012, those who participated in  
246 2011 or 2012 were older (median (IQR) age = 50 (38–66) years, vs 43 (29–58) years), more likely to be

247 women, unmarried, have lower levels of education, be unemployed, and have a higher BMI  
1  
2  
3 248 (Supplementary Table 2). There was no difference in participation rates by distance from the nearest clinic.  
4  
5 249 When we expanded the observation period to include surveys from 2011-2015, a total of 1,421 (83.3%)  
6  
7 250 participated in at least one home-based annual general health survey. Of the 285 (16.7%) individuals who  
8  
9 251 did not participate in any health survey after 2010, 81 out-migrated and 36 died before the 2011 survey  
10  
11 252 (Figure 1). The remaining 168 were eligible for at least one subsequent survey but refused participation.  
12  
13

14 253

#### 16 254 *Linkage to subsequent hypertension care*

18 255 The crude and, IPW-adjusted population prevalence of linkage to hypertension care within two years of  
19  
20 256 the blood pressure screen was 28.6% (95%CI=26.1-31.2%), and 26.9% (95%CI=24.5-29.4%), respectively. Of  
21  
22 257 the 343 total new linkages reported, 218 (64%) and 135 (36%) were reported in 2011 and 2012,  
23  
24 258 respectively. Of the 218 linkages reported in 2011, the majority (191, 88%) reported initiating anti-  
25  
26 259 hypertensive therapy. Using IPW-adjusted estimates, we found that women were more likely than men to  
27  
28 260 link to care, and older individuals were more likely than younger individuals (Figure 2), such that we  
29  
30 261 estimate that 44.9% (95%CI=39.4-50.5%) of women  $\geq 60$  years presented to care for hypertension in the  
31  
32 262 next two years, versus only 3.0% (95%CI=1.1-7.7%) of men under 45. When we extended our surveillance  
33  
34 263 period out to 2015, we estimate that 38.1% (95%CI=35.6-40.7%) of individuals reported linking to  
35  
36 264 hypertension care within 5 years. Finally, we found that only 16.6% (95%CI=14.6-18.9%) of individuals who  
37  
38 265 remained a resident in 2016 and who screened positive for elevated blood pressure in 2010 completed a  
39  
40 266 clinic appointment for hypertension at one of the public health clinics in the catchment area in 2016.  
41  
42  
43  
44  
45

46 267

#### 48 268 *Factors associated with presentation to hypertension care within two years*

50 269 In models adjusted for socioeconomic, geographic, and clinical factors, we found strong evidence that  
51  
52 270 women (OR=2.76, 95%CI=1.97 – 3.88,  $p < 0.001$ ) and those of older age (OR=12.89, 95%CI 6.62 – 25.11,  
53  
54 271  $p < 0.0001$ , comparing those 45-59 years versus those  $< 30$ ) were more likely to present to hypertension care  
55  
56 272 within two years of home-based diagnosis (Table 2). In adjusted analysis, the association with age and sex  
57  
58  
59



273 remained statistically significant, and there was no evidence that the effect of age on linkage to care  
274 differed between men and women ( $p$ -value for interaction=0.20, Figure 2). There was evidence that those  
275 who were unemployed were more likely to link to care (adjusted (a)OR 2.09, 95%CI 1.39 – 3.14). There was  
276 an association between distance from clinic and linkage to hypertension care such that odds of  
277 presentation increased as distance to the clinic increased (aOR for linear trend in linkage with each 1 km  
278 increase in distance = 1.12, 95%CI=1.05–1.20,  $p$ <0.001). The results of the fractional polynomial models  
279 suggested that the linear model adequately described the relationship between presentation to care and  
280 distance. After adjusting for sociodemographic and location factors, we also found strong evidence that  
281 individuals with the equivalent of Stage II hypertension (aOR=2.20, 95%CI=1.63 – 2.97), and those meeting  
282 criteria for hypertensive urgency (aOR=3.07, 95%CI=2.01 – 4.67) had higher odds of linking to care than  
283 those with the equivalent of Stage I hypertension. We found similar correlates of presentation to  
284 hypertension care (age, sex, distance from clinic, and employment) in sensitivity analyses with weighted  
285 models, and in models with a covariate for the number of follow-up surveys completed during 2011-2015  
286 (Supplementary Tables 3-5).

## 288 DISCUSSION

289 We found very low rates of presentation to care after home-based identification of elevated blood  
290 pressure in rural KwaZulu Natal. Overall, less than one third of individuals newly identified with elevated  
291 blood pressure reported being diagnosed with hypertension or receiving treatment for elevated blood  
292 pressure from a clinic within two years, and less than one in five had evidence of visiting a clinic for  
293 hypertension care during a 12-month period seven years after the screen. Linkage rates were particularly  
294 low for men and young people. Notably, those employed and those closest to clinics also had poorer rates  
295 of linkage. These results highlight the important need to consider the determinants of healthcare access  
296 for NCDs in rural South Africa, and multi-faceted approaches to improve linkage to care after community-  
297 based NCD screening programs.

298

299 Linkage with clinical programs after community- and home-based disease screening for chronic disease in  
1  
2 300 sub-Saharan Africa have demonstrated mixed results. Most evidence has come from the HIV field, in which  
3  
4 301 linkage after home-based testing in pilot studies has been highly successful,<sup>17</sup> although lower rates are  
5  
6 302 reported in community settings.<sup>9,18</sup> Studies reporting clinic attendance after hypertension screening have  
7  
8 303 generally shown low rates of linkage to care. For example, in a large (n=6,000) health fair-based screening  
9  
10 304 program in Uganda, 41% of participants with a new positive screen for elevated blood pressure linked to  
11  
12 305 care.<sup>9</sup> A pilot study in Kenya that compared a home-based (n=236) with a community-based healthfair  
13  
14 306 booth approach (n=346) for hypertension and diabetes screening, found equally low rates of linkage to  
15  
16 307 care (30%) with both strategies<sup>19</sup>. A smaller study in Kenya yielded higher linkage rates (74%, n=120) after  
17  
18 308 community group-initiated blood pressure screening.<sup>20</sup> Interpreting these contrasting results must be done  
19  
20 309 with attention to the selection criteria of each. Whereas our procedures were home-based, the larger  
21  
22 310 study from Uganda included self-referring individuals who had attended a health fair, and the Kenyan  
23  
24 311 study operated through a peer microfinance program, in which NCD screening services were paired with  
25  
26 312 agribusiness advice within pre-organized community groups. In the prior report most similar to ours, a  
27  
28 313 large program in Malawi (n=27,305) that provided clinical referrals after home-based testing reported a  
29  
30 314 59% linkage rate within two weeks of a diagnosis of hypertension, although 30% of participants were  
31  
32 315 already on treatment at the time of referral.<sup>21</sup> Moreover, approximately 50% dropped out of care within 6  
33  
34 316 months of linkage.  
35  
36  
37  
38  
39  
40  
41  
42  
43

44 318 Predictors of presentation to care in our study reinforce much of the literature on health care access and  
45  
46 319 engagement among vulnerable populations in sub-Saharan Africa. Lower engagement by younger  
47  
48 320 individuals and men are well-established phenomena; and a public health challenge for the region.<sup>22,23</sup>  
49  
50 321 Although it did not reach statistical significance, we also found evidence that those with greater social  
51  
52 322 support, as evidenced by having a cohabitating partner, had a 35% increased odds of presenting to care.  
53  
54 323 An unexpected finding was that those who were unemployed and those further from clinic were more  
55  
56 324 likely to link to care. This finding contrasts with much of the data from the region on how distance from  
57  
58  
59

325 health services impacts linkage to and retention in care.<sup>24-26</sup> We hypothesize that these results illustrate  
1  
2 326 competing demands between obligations to work and to access healthcare. Notably, a similar  
3  
4 327 phenomenon was found in the Malawi home-based NCD screening study, in which rural participants had  
5  
6 328 more than twice the odds of linkage to NCD care than their urban counterparts, and the most common  
7  
8 329 reason stated for failure to link to care in urban areas was being too busy to attend clinic; reported in 34%  
9  
10 330 of those not linked to care.<sup>21</sup> Employment is higher in male than in female South African blacks<sup>27</sup>, and so  
11  
12 331 may also contribute to the gender difference in linkage.  
13  
14 332  
15  
16 333 Our data do offer multiple potential strategies to improve linkage to care after home-based NCD screening.  
17  
18 334 For example, a notable distinction between many community-based HIV and NCD diagnostic programs is  
19  
20 335 the degree of counseling and referral services provided after diagnosis. Hypertension referral services in  
21  
22 336 our program and many others in the region are often limited to distribution of results and referral forms.  
23  
24 337 The potential beneficial effects of more comprehensive health and lifestyle counseling on the success of  
25  
26 338 linkage after an elevated blood pressure screen should be actively explored in future work. For example,  
27  
28 339 decades of standardizing in-depth HIV counseling services, and additional facilitated linkage strategies  
29  
30 340 have significantly improved rates of linkage after a new HIV diagnosis.<sup>28</sup> Pilot studies of enhanced referral  
31  
32 341 after community based NCD diagnoses have also shown promise in vulnerable populations in the United  
33  
34 342 States,<sup>29 30</sup> and warrant investigation on a larger scale elsewhere. Similarly, our finding and that of others  
35  
36 343 that hypertension linkage was less common in those employed presents a potential opportunity to  
37  
38 344 consider expanded clinic service hours and/or community based management to improve NCD care in the  
39  
40 345 region. Endeavors, such as the Centralised Chronic Medication Dispensing and Distribution recently  
41  
42 346 launched by the KwaZulu Natal Department of Health, seek to overcome such barriers by delivering  
43  
44 347 medicines to peoples' homes and workplaces, or setting up community-based medicine pickup points.  
45  
46 348 Evaluations of the efficacy and sustainability of such programs will be of high importance to the field.  
47  
48 349 Finally, our results, and particularly the high prevalence of elevated blood pressure and low rates of care  
49  
50 350 sinking after notification of such, highlight the critical importance of risk factor modification as part of  
51  
52  
53  
54  
55  
56  
57  
58  
59

351 public health strategies. Such programs, including smoking cessation, healthy diet, and exercise promotion,  
1  
2 352 which are recommended by South African Department of Health hypertension control policies, have  
3  
4 353 potential to significantly impact health, and must also remain a cornerstone of population hypertension  
5  
6  
7 354 control programs.<sup>31 32</sup>

8  
9 355  
10  
11 356 Our study is strengthened by a large sample size and the use of a home-based testing paradigm. The  
12  
13  
14 357 primary limitation to our analysis is the relatively low response rate in the initial hypertension screen and  
15  
16 358 participation in subsequent surveys. We accounted for this limitation by comparing characteristics  
17  
18 359 between participants and non-participants, and by using inverse probability weighting techniques to make  
19  
20  
21 360 population level inferences. We hypothesize that the low participation in this instance was due to the  
22  
23 361 placement of the screening activity within a routine annual survey, as opposed to a stand-alone health  
24  
25 362 promotion. Nonetheless, it should be noted that a similar response rate for health interventions would  
26  
27 363 also pose a challenge to their use for population-wide screening programs. Our study is also limited by a  
28  
29  
30 364 use of self-report to detect linkage to clinical care over the first two years of observation and clinic records  
31  
32 365 seven years later, which may lead to misestimation of outcomes. For example, participants who presented  
33  
34 366 to clinic and had a normal blood pressure might not be detected by self-report of a new diagnosis of  
35  
36  
37 367 hypertension or with use of clinical records to seven years after the initial screen. Our study also did not  
38  
39 368 investigate if and how supply-side considerations, such as staffing, wait times, and drug availability might  
40  
41 369 have contributed to the low rates of linkage. Although hypertension care and treatment is provided free of  
42  
43  
44 370 charge in South Africa in health clinics in the public sector, these factors have been demonstrated to affect  
45  
46 371 engagement in care elsewhere in the country.<sup>33 34</sup> Finally, our results should be considered in the context  
47  
48 372 of the low-resource, rural sub-Saharan Africa setting, but are unlikely to generalize more broadly to  
49  
50  
51 373 urban or higher resource regions.

52  
53 374  
54  
55 375 In summary, we found very low rates of linkage to care after a population-level, home-based hypertension  
56  
57 376 screen in rural KwaZulu Natal. Strategies focused on increased demand generation, particularly for

1 377 younger individuals and men, augmented referral and linkage programs, and efforts to enhance the  
2  
3 378 convenience of service delivery, particularly to employed people, should be evaluated to improve NCD  
4  
5 379 care access after community based testing in the region.  
6  
7 380  
8  
9  
10  
11  
12  
13  
14  
15  
16  
17  
18  
19  
20  
21  
22  
23  
24  
25  
26  
27  
28  
29  
30  
31  
32  
33  
34  
35  
36  
37  
38  
39  
40  
41  
42  
43  
44  
45  
46  
47  
48  
49  
50  
51  
52  
53  
54  
55  
56  
57  
58  
59  
60

For peer review only

381

**382 Author Contributions:**

383 MJS: Conceived of the project, wrote the first draft, and contributed to the data analysis.

384 KB: Led the data analysis, contributed to manuscript production.

385 JOB: Helped conceive of the project and contributed to manuscript production.

386 DP: Contributed to data collection, project conception, and contributed to manuscript production.

387 OK: Contributed to data collection, project conception, and contributed to manuscript production.

388 EW: Contributed to data collection and project conception.

389 PM: Contributed to data collection, project conception, and contributed to manuscript production.

390 FT: Contributed to data collection and project conception.

391 KH: Contributed to data collection and project conception.

392 TB: Contributed to data collection, project conception, and contributed to manuscript production.

393 MB: Contributed to project conception, data analysis, and contributed to manuscript production.

394 All authors reviewed the manuscript for editorial contributions and approved of the final version.

395

**396 Data Sharing:**

397 Data for this analysis is available by emailing Mark Siedner ([msiedner@mgh.harvard.edu](mailto:msiedner@mgh.harvard.edu)) and Kobus

398 Herbst ([kherbst@ahri.org](mailto:kherbst@ahri.org))

399

400

401

402

## REFERENCES

1. Lozano R, Naghavi M, Foreman K, et al. Global and regional mortality from 235 causes of death for 20 age groups in 1990 and 2010: a systematic analysis for the Global Burden of Disease Study 2010. *Lancet* 2012;380(9859):2095-128. doi: 10.1016/S0140-6736(12)61728-0
2. Alwan A, Maclean DR, Riley LM, et al. Monitoring and surveillance of chronic non-communicable diseases: progress and capacity in high-burden countries. *Lancet* 2010;376(9755):1861-8. doi: 10.1016/S0140-6736(10)61853-3
3. Non-communicable Diseases Progress Monitor. World Health Organization. 2017. Available at: [https://ncdalliance.org/sites/default/files/resource\\_files/WHOProgressMonitor2017.pdf](https://ncdalliance.org/sites/default/files/resource_files/WHOProgressMonitor2017.pdf). Accessed 21st November 2017.
4. Global Action Plan for the Prevention and Control of Non-Communicable Diseases 2013-2020. World Health Organization. Available at: [http://apps.who.int/iris/bitstream/10665/94384/1/9789241506236\\_eng.pdf](http://apps.who.int/iris/bitstream/10665/94384/1/9789241506236_eng.pdf). Accessed 21st November, 2017.
5. Yusuf S, Hawken S, Ounpuu S, et al. Effect of potentially modifiable risk factors associated with myocardial infarction in 52 countries (the INTERHEART study): case-control study. *Lancet* 2004;364(9438):937-52. doi: 10.1016/S0140-6736(04)17018-9 [published Online First: 2004/09/15]
6. O'Donnell MJ, Chin SL, Rangarajan S, et al. Global and regional effects of potentially modifiable risk factors associated with acute stroke in 32 countries (INTERSTROKE): a case-control study. *Lancet* 2016;388(10046):761-75. doi: 10.1016/S0140-6736(16)30506-2 [published Online First: 2016/07/20]
7. Health Systems Trust. South African Health Review, 2016.
8. Strategic Plan for the Prevention and Control of Non-Communicable Diseases 2013-17. South African Ministry of Health. Available at: <http://www.hsrc.ac.za/uploads/pageContent/3893/NCDs STRAT PLAN CONTENT 8 april proof.pdf> Accessed 21st November 2017.
9. Chamie G, Kwarisiima D, Clark TD, et al. Leveraging rapid community-based HIV testing campaigns for non-communicable diseases in rural Uganda. *PLoS One* 2012;7(8):e43400. doi: 10.1371/journal.pone.0043400 [published Online First: 2012/08/24]
10. Gaziano TA, Abrahams-Gessel S, Denman CA, et al. An assessment of community health workers' ability to screen for cardiovascular disease risk with a simple, non-invasive risk assessment instrument in Bangladesh, Guatemala, Mexico, and South Africa: an observational study. *The Lancet Global health* 2015;3(9):e556-63. doi: 10.1016/S2214-109X(15)00143-6 [published Online First: 2015/07/19]
11. Tanser F, Hosegood V, Barnighausen T, et al. Cohort Profile: Africa Centre Demographic Information System (ACDIS) and population-based HIV survey. *International journal of epidemiology* 2008;37(5):956-62. doi: 10.1093/ije/dym211 [published Online First: 2007/11/14]
12. World Health Organization. Noncommunicable diseases and mental health cluster. WHO STEPS Surveillance Manual: The WHO STEPwise Approach to Chronic Disease Risk Factor Surveillance. Geneva. 2005
13. Malaza A, Mossong J, Barnighausen T, et al. Hypertension and obesity in adults living in a high HIV prevalence rural area in South Africa. *PLoS One* 2012;7(10):e47761. doi: 10.1371/journal.pone.0047761
14. Filmer D, Pritchett LH. Estimating wealth effects without expenditure data--or tears: an application to educational enrollments in states of India. *Demography* 2001;38(1):115-32. [published Online First: 2001/03/03]
15. Glanz K, Rimer BK, Viswanath K. Health behavior and health education: Theory, Research and Practice. 4th ed. San Francisco, CA: Jossey-Bass 2008.
16. Royston P, Ambler G, Sauerbrei W. The use of fractional polynomials to model continuous risk variables in epidemiology. *International journal of epidemiology* 1999;28(5):964-74. [published Online First: 1999/12/22]
17. van Rooyen H, Barnabas RV, Baeten JM, et al. High HIV testing uptake and linkage to care in a novel program of home-based HIV counseling and testing with facilitated referral in KwaZulu-Natal, South

- Africa. *J Acquir Immune Defic Syndr* 2013;64(1):e1-8. doi: 10.1097/QAI.0b013e31829b567d [published Online First: 2013/05/30]
18. Iwuji CC, Orne-Gliemann J, Larmarange J, et al. Universal test and treat and the HIV epidemic in rural South Africa: a phase 4, open-label, community cluster randomised trial. *Lancet HIV* 2017 doi: 10.1016/S2352-3018(17)30205-9 [published Online First: 2017/12/05]
19. Pastakia SD, Ali SM, Kamano JH, et al. Screening for diabetes and hypertension in a rural low income setting in western Kenya utilizing home-based and community-based strategies. *Globalization and health* 2013;9:21. doi: 10.1186/1744-8603-9-21 [published Online First: 2013/05/18]
20. Pastakia SD, Manyara SM, Vedanthan R, et al. Impact of Bridging Income Generation with Group Integrated Care (BIGPIC) on Hypertension and Diabetes in Rural Western Kenya. *J Gen Intern Med* 2017;32(5):540-48. doi: 10.1007/s11606-016-3918-5 [published Online First: 2016/12/07]
21. Musicha C, Crampin AC, Kayuni N, et al. Accessing clinical services and retention in care following screening for hypertension and diabetes among Malawian adults: an urban/rural comparison. *Journal of hypertension* 2016;34(11):2172-9. doi: 10.1097/HJH.0000000000001070 [published Online First: 2016/08/24]
22. Kotwani P, Balzer L, Kwarisiima D, et al. Evaluating linkage to care for hypertension after community-based screening in rural Uganda. *Trop Med Int Health* 2014;19(4):459-68. doi: 10.1111/tmi.12273 [published Online First: 2014/02/06]
23. Zack RM, Irema K, Kazonda P, et al. Determinants of high blood pressure and barriers to diagnosis and treatment in Dar es Salaam, Tanzania. *Journal of hypertension* 2016;34(12):2353-64. doi: 10.1097/HJH.0000000000001117 [published Online First: 2016/11/03]
24. Lankowski AJ, Siedner MJ, Bangsberg DR, et al. Impact of geographic and transportation-related barriers on HIV outcomes in sub-Saharan Africa: a systematic review. *AIDS Behav* 2014;18(7):1199-223. doi: 10.1007/s10461-014-0729-8
25. Siedner MJ, Lankowski A, Tsai AC, et al. GPS-measured distance to clinic, but not self-reported transportation factors, are associated with missed HIV clinic visits in rural Uganda. *AIDS* 2013;27(9):1503-8. doi: 10.1097/QAD.0b013e32835fd873
26. Tanser F, Gijsbertsen B, Herbst K. Modelling and understanding primary health care accessibility and utilization in rural South Africa: an exploration using a geographical information system. *Social science & medicine* 2006;63(3):691-705. doi: 10.1016/j.socscimed.2006.01.015 [published Online First: 2006/04/01]
27. Statistics South Africa. Gender statistics in South Africa, 2011. <http://www.statssa.gov.za/publications/Report-03-10-05/Report-03-10-052011.pdf> (accessed 27 February 2017).
28. Sharma M, Ying R, Tarr G, et al. Systematic review and meta-analysis of community and facility-based HIV testing to address linkage to care gaps in sub-Saharan Africa. *Nature* 2015;528(7580):S77-85. doi: 10.1038/nature16044 [published Online First: 2015/12/04]
29. Krieger J, Collier C, Song L, et al. Linking community-based blood pressure measurement to clinical care: a randomized controlled trial of outreach and tracking by community health workers. *Am J Public Health* 1999;89(6):856-61. [published Online First: 1999/06/08]
30. Baig AA, Mangione CM, Sorrell-Thompson AL, et al. A randomized community-based intervention trial comparing faith community nurse referrals to telephone-assisted physician appointments for health fair participants with elevated blood pressure. *J Gen Intern Med* 2010;25(7):701-9. doi: 10.1007/s11606-010-1326-9 [published Online First: 2010/03/30]
31. Rose G. Sick individuals and sick populations. *International journal of epidemiology* 2001;30(3):427-32; discussion 33-4. [published Online First: 2001/06/21]
32. South African Health Review. Health Systems Trust. Durban, South Africa. 2016. Available at: <https://www.health-e.org.za/wp-content/uploads/2016/05/South-African-Health-Review-2016.pdf>; Accessed 8th January 2018.
33. Wollum A, Gabert R, McNellan CR, et al. Identifying gaps in the continuum of care for cardiovascular disease and diabetes in two communities in South Africa: Baseline findings from the HealthRise



project. *PLoS One* 2018;13(3):e0192603. doi: 10.1371/journal.pone.0192603 [published Online First: 2018/03/15]

34. Ameh S, Klipstein-Grobusch K, D'Ambruoso L, et al. Quality of integrated chronic disease care in rural South Africa: user and provider perspectives. *Health policy and planning* 2017;32(2):257-66. doi: 10.1093/heapol/czw118 [published Online First: 2017/02/17]

For peer review only

**Table 1.** Participants with blood pressure measured in in 2010 survey, those with hypertension<sup>1</sup> and stratified by whether or not previously diagnosed or on treatment

|                                            | All participants | N with hypertension <sup>1</sup> | Previously diagnosed <sup>2</sup> | Not previously diagnosed <sup>3</sup> |
|--------------------------------------------|------------------|----------------------------------|-----------------------------------|---------------------------------------|
|                                            | N=11,694         | N=3,074 (26.3%)                  | N=1,368 (44.5%)                   | N=1,706 (55.5%)                       |
| <b>Median (IQR) age (years)</b>            | 34 (21–53)       | 55 (43–68)                       | 60 (51–71)                        | 49 (35–63)                            |
| <b>Age group</b>                           |                  |                                  |                                   | P<0.001 <sup>4</sup>                  |
| <30                                        | 5,107 (43.7%)    | 354 (11.5%)                      | 21 (1.5 %)                        | 333 (19.5%)                           |
| 35-44                                      | 2,191 (18.7%)    | 484 (15.7%)                      | 118 (8.6 %)                       | 366 (21.5%)                           |
| 45-59                                      | 2,265 (19.4%)    | 992 (32.3%)                      | 507 (37.1%)                       | 485 (28.4%)                           |
| 60+                                        | 2,131 (18.2%)    | 1,244 (40.5%)                    | 722 (52.8%)                       | 522 (30.6%)                           |
| <b>Sex</b>                                 |                  |                                  |                                   | P<0.001                               |
| Male                                       | 3,453 (29.5%)    | 720 (23.4%)                      | 178 (13.0%)                       | 542 (31.8%)                           |
| Female                                     | 8,241 (70.5%)    | 2,354 (76.6%)                    | 1190 (87.0%)                      | 1164 (68.2%)                          |
| <b>Education</b>                           |                  |                                  |                                   | P<0.001                               |
| None                                       | 2,389 (20.5%)    | 1,032 (33.6%)                    | 550 (40.2%)                       | 482 (28.3%)                           |
| Less than complete secondary               | 6,244 (53.5%)    | 1,463 (47.6%)                    | 662 (48.4%)                       | 801 (47.0%)                           |
| Complete secondary/above                   | 3,040 (26.0%)    | 576 (18.8%)                      | 155 (11.3%)                       | 421 (24.7%)                           |
| Missing                                    | 21               | 3                                | 1                                 | 2                                     |
| <b>Marital status</b>                      |                  |                                  |                                   | P<0.001                               |
| Single (never married)                     | 3,462 (29.8%)    | 518 (16.9%)                      | 174 (12.7%)                       | 344 (20.2%)                           |
| Married/informal union                     | 6,556 (56.3%)    | 1,696 (55.2%)                    | 688 (50.3%)                       | 1008 (59.2%)                          |
| Widowed/separated/divorced                 | 1,618 (13.9%)    | 857 (27.9%)                      | 506 (37.0%)                       | 351 (20.6%)                           |
| Missing                                    | 58               | 3                                | 0                                 | 3                                     |
| <b>Employed</b>                            |                  |                                  |                                   | P<0.001                               |
| Yes                                        | 1,779 (15.3%)    | 437 (14.2%)                      | 140 (10.2%)                       | 297 (17.4%)                           |
| No                                         | 9,828 (84.7%)    | 2,634 (85.8%)                    | 1,228 (89.8%)                     | 1406 (82.6%)                          |
| Missing                                    | 87               | 3                                | 0                                 | 3                                     |
| <b>Residence</b>                           |                  |                                  |                                   | P<0.001                               |
| Urban                                      | 617 (5.3 %)      | 119 (3.9 %)                      | 55 (4.0 %)                        | 64 (3.8 %)                            |
| Peri-urban                                 | 3,604 (30.8%)    | 904 (29.4%)                      | 347 (25.4%)                       | 557 (32.7%)                           |
| Rural                                      | 7,464 (63.9%)    | 2,050 (66.7%)                    | 966 (70.6%)                       | 1084 (63.6%)                          |
| Missing                                    | 9                | 1                                | 0                                 | 1                                     |
| <b>SES tertile</b>                         |                  |                                  |                                   | P=0.67                                |
| Low                                        | 4193 (36.4%)     | 1173 (38.6%)                     | 525 (38.7%)                       | 648 (38.5%)                           |
| Middle                                     | 3818 (33.1%)     | 947 (31.2%)                      | 412 (30.4%)                       | 535 (31.8%)                           |
| High                                       | 3522 (30.5%)     | 918 (30.2%)                      | 418 (30.8%)                       | 500 (29.7%)                           |
| Missing                                    | 161              | 36                               | 13                                | 23                                    |
| <b>Self-report of diabetes<sup>5</sup></b> |                  |                                  |                                   | P<0.001                               |
| No                                         | 11300 (96.6%)    | 2867 (93.3%)                     | 1176 (86.0%)                      | 1691 (99.1%)                          |
| Yes                                        | 394 (3.4 %)      | 207 (6.7 %)                      | 192 (14.0%)                       | 15 (0.9 %)                            |
| <b>Nearest clinic (km)<sup>6</sup></b>     |                  |                                  |                                   | P=0.84                                |
| 0- <1.5                                    | 2642 (22.6%)     | 676 (22.0%)                      | 292 (21.3%)                       | 384 (22.5%)                           |
| 1.5-2.5                                    | 2879 (24.6%)     | 710 (23.1%)                      | 314 (23.0%)                       | 396 (23.2%)                           |
| >2.5-3.9                                   | 2975 (25.5%)     | 809 (26.3%)                      | 368 (26.9%)                       | 441 (25.9%)                           |
| >3.9                                       | 3189 (27.3%)     | 878 (28.6%)                      | 394 (28.8%)                       | 484 (28.4%)                           |
| Missing                                    | 9                | 1                                | 0                                 | 1                                     |

<sup>1</sup>Hypertension defined as systolic BP  $\geq$  140mmHg or diastolic BP  $\geq$ 90 mmHg, in an average of 2 readings. <sup>2</sup>Report having been previously diagnosed or on treatment for hypertension in 2010 survey. <sup>3</sup>Report no previous diagnosis or treatment for hypertension in 2010 survey. <sup>4</sup>P-value from Chi-squared test comparing characteristics of those previously diagnosed/treatment and those with no previous diagnosis/treatment. <sup>5</sup>Report having been diagnosed with or on treatment for diabetes in 2010 survey. <sup>6</sup>Quartiles based on distribution in all individuals who were eligible for 2010 survey.

**Table 2.** Factors<sup>1</sup> associated with linkage to hypertension care within 2 years after home-based diagnosis of hypertension<sup>2</sup> in 2010, among individuals who were previously undiagnosed and participated in 2011 or 2012 (N=1199) (unweighted analysis)

|                                            | Linked to care/N (%) | Crude OR (95% CI)               | Age- & sex-adjusted OR (95% CI) | Adjusted OR (95% CI) <sup>3</sup> |
|--------------------------------------------|----------------------|---------------------------------|---------------------------------|-----------------------------------|
| <b>Sociodemographic factors</b>            |                      |                                 |                                 |                                   |
| <b>Age group</b>                           |                      | P<0.001                         | P<0.001                         | P<0.001                           |
| <30                                        | 10 / 193 (5.2 %)     | 1                               | 1                               | 1                                 |
| 35-44                                      | 40 / 242 (16.5%)     | 3.62 (1.76 -7.45 )              | 3.08 (1.49 -6.36 )              | 3.32 (1.60 -6.89 )                |
| 45-59                                      | 126 / 360 (35.0%)    | 9.85 (5.03 -19.30)              | 8.39 (4.26 -16.51)              | 9.01 (4.57 -17.79)                |
| 60+                                        | 167 / 404 (41.3%)    | 12.89 (6.62 -25.11)             | 11.61 (5.94 -22.69)             | 11.49 (5.87 -22.46)               |
| <b>Sex</b>                                 |                      | P<0.001                         | P<0.001                         | P<0.001                           |
| Male                                       | 47 / 308 (15.3%)     | 1                               | 1                               | 1                                 |
| Female                                     | 296 / 891 (33.2%)    | 2.76 (1.97 -3.88 )              | 2.50 (1.75 -3.57 )              | 2.41 (1.68 -3.45 )                |
| <b>Marital status</b>                      |                      | P<0.001                         | P=0.15                          | P=0.14                            |
| Single (never married)                     | 55 / 250 (22.0%)     | 1                               | 1                               | 1                                 |
| Married/informal union                     | 178 / 666 (26.7%)    | 1.29 (0.92 -1.83 )              | 1.33 (0.91 -1.95 )              | 1.35 (0.92 -1.98 )                |
| Widow/sep/divorced                         | 110 / 283 (38.9%)    | 2.25 (1.54 -3.31 )              | 0.98 (0.64 -1.50 )              | 0.99 (0.65 -1.51 )                |
| <b>Education</b>                           |                      | P<0.001                         | P=0.83                          | P=0.77                            |
| None                                       | 132 / 363 (36.4%)    | 1                               | 1                               | 1                                 |
| Less than complete secondary               | 160 / 581 (27.5%)    | 0.67 (0.50 -0.88 )              | 1.10 (0.81 -1.49 )              | 1.09 (0.80 -1.49 )                |
| Complete secondary/above                   | 51 / 255 (20.0%)     | 0.44 (0.30 -0.64 )              | 1.09 (0.71 -1.67 )              | 1.15 (0.75 -1.78 )                |
| <b>Employed</b>                            |                      | P<0.001                         | P=0.02                          | P=0.02                            |
| Yes                                        | 31 / 178 (17.4%)     | 1                               | 1                               | 1                                 |
| No                                         | 312 / 1021 (30.6%)   | 2.09 (1.39 -3.14 )              | 1.71 (1.10 -2.65 )              | 1.71 (1.10 -2.65 )                |
| <b>SES tertile</b>                         |                      | P=0.307                         | P=0.31                          | P=0.21                            |
| Low                                        | 125 / 459 (27.2%)    | 1                               | 1                               | 1                                 |
| Middle                                     | 99 / 364 (27.2%)     | 1.00 (0.73 -1.36 )              | 1.09 (0.79 -1.52 )              | 1.12 (0.81 -1.56 )                |
| High                                       | 115 / 364 (31.6%)    | 1.23 (0.91 -1.67 )              | 1.28 (0.93 -1.77 )              | 1.34 (0.97 -1.85 )                |
| <b>Location factors</b>                    |                      |                                 |                                 |                                   |
| <b>Residence</b>                           |                      | P=0.04                          | P=0.35                          | P=0.55                            |
| Urban                                      | 10 / 36 (27.8%)      | 1                               | 1                               | 1                                 |
| Peri-urban                                 | 95 / 398 (23.9%)     | 0.82 (0.38 -1.75 )              | 0.75 (0.33 -1.69 )              | 0.67 (0.29 -1.53 )                |
| Rural                                      | 238 / 765 (31.1%)    | 1.17 (0.56 -2.47 )              | 0.92 (0.41 -2.05 )              | 0.63 (0.27 -1.45 )                |
| <b>Nearest clinic<sup>4</sup></b>          |                      | P<0.001                         | P=0.001                         | P=0.001                           |
| Per each km of distance                    |                      | 1.15 (1.08 -1.23 ) <sup>5</sup> | 1.13 (1.05 -1.21 ) <sup>5</sup> | 1.12 (1.05 -1.20 ) <sup>5</sup>   |
| 0- <1.5                                    | 56 / 263 (21.3%)     |                                 |                                 |                                   |
| 1.5-2.5                                    | 71 / 269 (26.4%)     |                                 |                                 |                                   |
| >2.5-3.9                                   | 93 / 310 (30.0%)     |                                 |                                 |                                   |
| >3.9                                       | 123 / 357 (34.5%)    |                                 |                                 |                                   |
| <b>Clinical factors</b>                    |                      |                                 |                                 |                                   |
| <b>BMI category</b>                        |                      | P<0.001                         | P=0.07                          | P=0.13                            |
| <25 kg/m <sup>2</sup>                      | 70 / 344 (20.3%)     | 1                               | 1                               | 1                                 |
| 25 – <30 kg/m <sup>2</sup>                 | 62 / 229 (27.1%)     | 1.45 (0.98 -2.15 )              | 1.08 (0.71 -1.64 )              | 1.17 (0.76 -1.81 )                |
| ≥30 kg/m <sup>2</sup>                      | 110 / 301 (36.5%)    | 2.25 (1.59 -3.21 )              | 1.52 (1.03 -2.24 )              | 1.51 (1.00 -2.26 )                |
| <b>Hypertension stage<sup>6</sup></b>      |                      | P<0.001                         | P<0.001                         | P<0.001                           |
| Stage I                                    | 142 / 730 (19.5%)    | 1                               | 1                               | 1                                 |
| Stage II                                   | 134 / 342 (39.2%)    | 2.67 (2.01 -3.54 )              | 2.22 (1.65 -2.99 )              | 2.20 (1.63 -2.97 )                |
| Hypertension urgency                       | 67 / 127 (52.8%)     | 4.62 (3.12 -6.85 )              | 3.12 (2.06 -4.74 )              | 3.07 (2.01 -4.67 )                |
| <b>Self-report of diabetes<sup>7</sup></b> |                      | P=0.19                          | P=0.44                          | P=0.47                            |
| No                                         | 339 / 1191 (28.5%)   | 1                               | 1                               | 1                                 |
| Yes                                        | 4 / 8 (50.0%)        | 2.51 (0.62 -10.11)              | 1.78 (0.41 -7.70 )              | 1.75 (0.38 -8.15 )                |

| Self-report of TB <sup>7</sup> |                    | P=0.66             | P=0.96             | P=0.72             |
|--------------------------------|--------------------|--------------------|--------------------|--------------------|
| No                             | 332 / 1156 (28.7%) | 1                  | 1                  | 1                  |
| Yes                            | 11 / 43 (25.6%)    | 0.85 (0.43 -1.71 ) | 1.02 (0.49 -2.13 ) | 1.15 (0.54 -2.46 ) |

<sup>1</sup>All characteristics are based on 2010 survey. <sup>2</sup>Hypertension defined as systolic BP  $\geq$  140mmHg or diastolic BP  $\geq$ 90 mmHg, in an average of 2 readings. <sup>3</sup>Sociodemographic factors adjusted for age group, sex, and employment. Location factors adjusted for age group, sex, employment, and distance from nearest clinic as continuous covariate. Clinical factors adjusted for age group, sex, employment, distance from nearest clinic and hypertension stage. <sup>4</sup>Quartiles based on distribution in all individuals who were eligible for 2010 survey. Fit as continuous covariate; n (%) linked in each distance quartile shown for information only. <sup>5</sup>OR for linear trend in linkage with each 1 km increase in distance. <sup>6</sup>Stage I: Systolic BP 140–159 or diastolic BP 90–99; Stage II: Systolic BP 160–179 or diastolic BP 100–119; Hypertension urgency: Systolic BP  $\geq$ 180 or diastolic BP  $\geq$ 120. <sup>7</sup>Reports being diagnosed in the past 12m or currently on treatment

1  
2  
3 **Figure 1.** Flow diagram of eligible and included participants in a baseline community-based  
4 hypertension screen in 2010 and follow-up observation during 2011/2012  
5  
6  
7  
8  
9  
10  
11  
12  
13  
14  
15  
16  
17  
18  
19  
20  
21  
22  
23  
24  
25  
26  
27  
28  
29  
30  
31  
32  
33  
34  
35  
36  
37  
38  
39  
40  
41  
42  
43  
44  
45  
46  
47  
48  
49  
50  
51  
52  
53  
54  
55  
56  
57  
58  
59  
60

For peer review only

1  
2  
3  
4  
5  
6  
7  
8  
9  
10  
11  
12  
13  
14  
15  
16  
17  
18  
19  
20  
21  
22  
23  
24  
25  
26  
27  
28  
29  
30  
31  
32  
33  
34  
35  
36  
37  
38  
39  
40  
41  
42  
43  
44  
45  
46  
47  
48  
49  
50  
51  
52  
53  
54  
55  
56  
57  
58  
59  
60

**Figure 2.** Proportion of individuals linked to hypertensive care two years after a new notification of elevated blood pressure (weighted estimates)

For peer review only

1  
2  
3  
4  
5  
6  
7  
8  
9  
10  
11  
12  
13  
14  
15  
16  
17  
18  
19  
20  
21  
22  
23  
24  
25  
26  
27  
28  
29  
30  
31  
32  
33  
34  
35  
36  
37  
38  
39  
40  
41  
42  
43  
44  
45  
46  
47  
48  
49  
50  
51  
52  
53  
54  
55  
56  
57  
58  
59  
60

For peer review only

1  
2  
3  
4  
5  
6  
7  
8  
9  
10  
11  
12  
13  
14  
15  
16  
17  
18  
19  
20  
21  
22  
23  
24  
25  
26  
27  
28  
29  
30  
31  
32  
33  
34  
35  
36  
37  
38  
39  
40  
41  
42  
43  
44  
45  
46  
47  
48  
49  
50  
51  
52  
53  
54  
55  
56  
57  
58  
59  
60

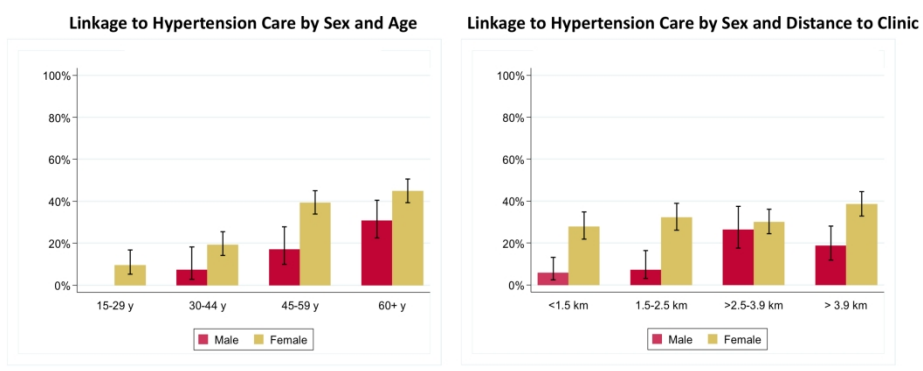

Figure 2. Proportion of individuals linked to hypertensive care two years after a new notification of elevated blood pressure (weighted estimates)

253x142mm (300 x 300 DPI)



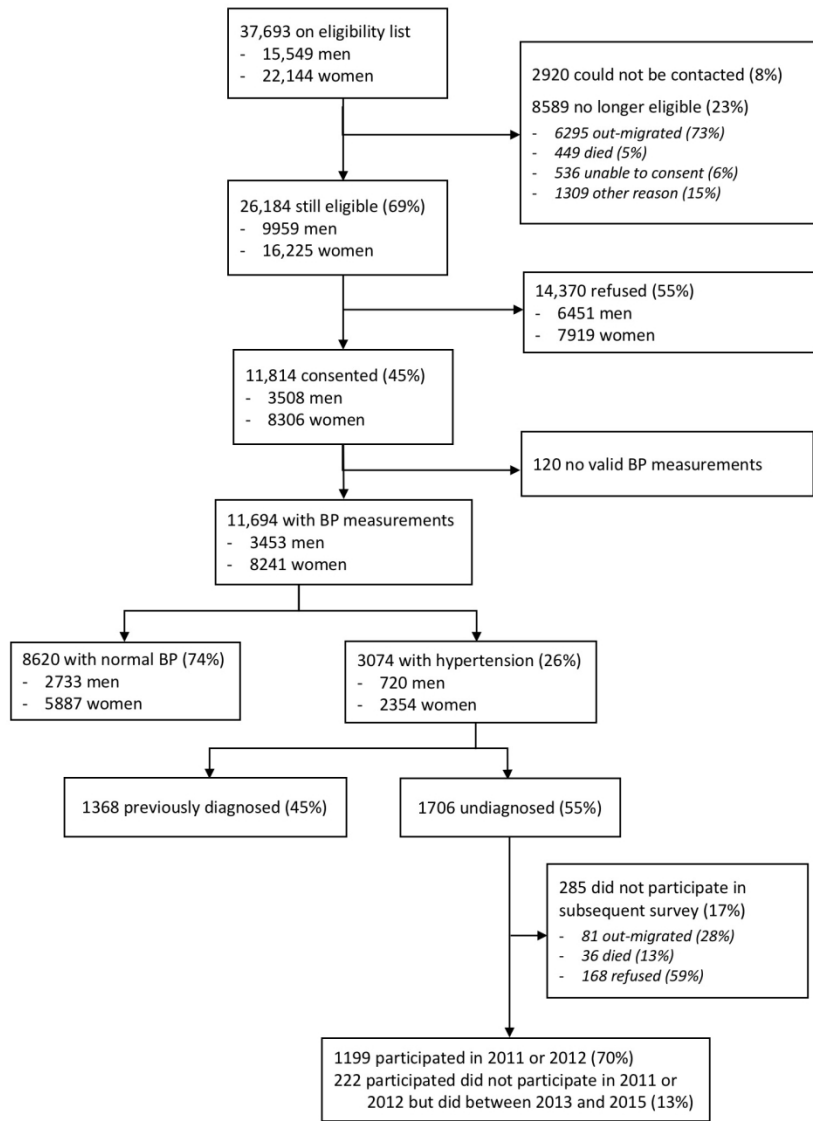

Figure 1. Flow diagram of eligible and included participants in a baseline community-based hypertension screen in 2010 and follow-up observation during 2011/2012

139x186mm (300 x 300 DPI)

**Supplementary Table 1.** Comparison of characteristics between those for whom a blood pressure measurement was taken in the 2010 survey, and those with no blood pressure measurements

|                                 | Eligible for survey <sup>1</sup> | BP measurements | No BP measurement <sup>2</sup> |
|---------------------------------|----------------------------------|-----------------|--------------------------------|
|                                 | N=26,184                         | N=11,694        | N=14,490                       |
| <b>Median (IQR) age (years)</b> | 32 (20–50)                       | 34 (21–53)      | 30 (20–47)                     |
| <b>Age group</b>                |                                  |                 | <b>P&lt;0.001<sup>3</sup></b>  |
| <30                             | 12,164 (46.5%)                   | 5106 (43.7%)    | 7058 (48.7%)                   |
| 35–44                           | 5523 (21.1%)                     | 2194 (18.8%)    | 3329 (23.0%)                   |
| 45–59                           | 4584 (17.5%)                     | 2251 (19.2%)    | 2333 (16.1%)                   |
| 60+                             | 3913 (14.9%)                     | 2143 (18.3%)    | 1770 (12.2%)                   |
| <b>Sex</b>                      |                                  |                 | <b>P&lt;0.001</b>              |
| Male                            | 9959 (38.0%)                     | 3453 (29.5%)    | 6506 (44.9%)                   |
| Female                          | 16,225 (62.0%)                   | 8241 (70.5%)    | 7984 (55.1%)                   |
| <b>Marital status</b>           |                                  |                 | <b>P&lt;0.001</b>              |
| Single (never married)          | 8113 (31.2%)                     | 3462 (29.8%)    | 4651 (32.4%)                   |
| Married/informal union          | 14,959 (57.6%)                   | 6556 (56.3%)    | 8403 (58.6%)                   |
| Widow/sep/divorced              | 2910 (11.2%)                     | 1618 (13.9%)    | 1292 (9.0%)                    |
| Missing                         | 202                              | 58              | 144                            |
| <b>Education</b>                |                                  |                 | <b>P&lt;0.001</b>              |
| None                            | 4558 (17.5%)                     | 2389 (20.5%)    | 2169 (15.1%)                   |
| Less than complete secondary    | 13,466 (51.6%)                   | 6244 (53.5%)    | 7222 (50.1%)                   |
| Complete secondary/above        | 8051 (30.9%)                     | 3040 (26.0%)    | 5011 (34.8%)                   |
| Missing                         | 109                              | 21              | 88                             |
| <b>Employed</b>                 |                                  |                 | <b>P&lt;0.001</b>              |
| Yes                             | 5860 (22.7%)                     | 1779 (15.3%)    | 4081 (28.6%)                   |
| No                              | 19,997 (77.3%)                   | 9828 (84.7%)    | 10,169 (71.4%)                 |
| Missing                         | 327                              | 87              | 240                            |
| <b>Residence</b>                |                                  |                 | <b>P&lt;0.001</b>              |
| Urban                           | 1953 (7.5%)                      | 617 (5.3%)      | 1336 (9.2%)                    |
| Peri-urban                      | 8084 (30.9%)                     | 3604 (30.8%)    | 4480 (31.0%)                   |
| Rural                           | 16,092 (61.6%)                   | 7464 (63.9%)    | 8628 (59.7%)                   |
| Missing                         | 55                               | 9               | 46                             |
| <b>SES tertile</b>              |                                  |                 | <b>P&lt;0.001</b>              |
| Low                             | 8566 (33.6%)                     | 4193 (36.4%)    | 4373 (31.4%)                   |
| Middle                          | 8330 (32.7%)                     | 3818 (33.1%)    | 4512 (32.4%)                   |
| High                            | 8569 (33.7%)                     | 3522 (30.5%)    | 5047 (36.2%)                   |
| Missing                         | 719                              | 161             | 558                            |

<sup>1</sup>Individuals who were on the eligibility list for the 2010 survey (aged ≥15 years as of Dec 2009 and resident in the DSS), were successfully contacted (92% of all on the list) and still eligible at the time of contact (75% of those contacted). <sup>2</sup>Includes 14,370 individuals who refused consent, and 120 individuals who consented but for whom blood pressure measurements were not available. <sup>3</sup>P-value from Chi-squared test comparing those with blood pressure measurements and those without.

**Supplementary Table 2.** Comparison of characteristics between those who participated in the general health survey in 2011 or 2012 and those who did not, among 1706 individuals with undiagnosed hypertension in 2010

|                                        | Participated in<br>2011/2012 | Did not participate<br>in 2011/2012 | Participated in<br>2011–2016 | No participation in<br>later survey |
|----------------------------------------|------------------------------|-------------------------------------|------------------------------|-------------------------------------|
|                                        | N=1199 (70.3%)               | N=507 (29.7%)                       | N=1421 (83.3%)               | N=285 (16.7%)                       |
| <b>Median (IQR) age (years)</b>        | 50 (38–66)                   | 43 (29–58)                          | 50 (37–65)                   | 41 (28–57)                          |
| <b>Age group</b>                       |                              | P<0.001 <sup>1</sup>                |                              | P<0.001 <sup>2</sup>                |
| <30                                    | 193 (16.1%)                  | 140 (27.6%)                         | 248 (17.5%)                  | 85 (29.8%)                          |
| 35–44                                  | 242 (20.2%)                  | 124 (24.5%)                         | 284 (20.0%)                  | 82 (28.8%)                          |
| 45–59                                  | 360 (30.0%)                  | 125 (24.7%)                         | 430 (30.3%)                  | 55 (19.3%)                          |
| 60+                                    | 404 (33.7%)                  | 118 (23.3%)                         | 459 (32.3%)                  | 63 (22.1%)                          |
| <b>Sex</b>                             |                              | P<0.001                             |                              | P<0.001                             |
| Male                                   | 308 (25.7%)                  | 234 (46.2%)                         | 394 (27.7%)                  | 148 (51.9%)                         |
| Female                                 | 891 (74.3%)                  | 273 (53.8%)                         | 1027 (72.3%)                 | 137 (48.1%)                         |
| <b>Marital status</b>                  |                              | P<0.001                             |                              | P<0.001                             |
| Single (never married)                 | 250 (20.9%)                  | 94 (18.7%)                          | 287 (20.2%)                  | 57 (20.2%)                          |
| Married/informal union                 | 666 (55.5%)                  | 342 (67.9%)                         | 817 (57.5%)                  | 191 (67.7%)                         |
| Widow/sep/divorced                     | 283 (23.6%)                  | 68 (13.5%)                          | 317 (22.3%)                  | 34 (12.1%)                          |
| <b>Education</b>                       |                              | P<0.001                             |                              | P<0.001                             |
| None                                   | 363 (30.3%)                  | 119 (23.6%)                         | 424 (29.8%)                  | 58 (20.5%)                          |
| Less than complete<br>secondary        | 581 (48.5%)                  | 220 (43.6%)                         | 678 (47.7%)                  | 123 (43.5%)                         |
| Complete secondary/above               | 255 (21.3%)                  | 166 (32.9%)                         | 319 (22.4%)                  | 102 (36.0%)                         |
| <b>Employed</b>                        |                              | P<0.001                             |                              | P<0.001                             |
| Yes                                    | 178 (14.8%)                  | 119 (23.6%)                         | 220 (15.5%)                  | 77 (27.3%)                          |
| No                                     | 1021 (85.2%)                 | 385 (76.4%)                         | 1201 (84.5%)                 | 205 (72.7%)                         |
| <b>Residence</b>                       |                              | P=0.04                              |                              | P=0.16                              |
| Urban                                  | 36 (3.0%)                    | 28 (5.5%)                           | 48 (3.4%)                    | 16 (5.6%)                           |
| Peri-urban                             | 398 (33.2%)                  | 159 (31.4%)                         | 470 (33.1%)                  | 87 (30.6%)                          |
| Rural                                  | 765 (63.8%)                  | 319 (63.0%)                         | 903 (63.5%)                  | 181 (63.7%)                         |
| <b>SES tertile</b>                     |                              | P=0.24                              |                              | P=0.05                              |
| Low                                    | 459 (38.7%)                  | 189 (38.1%)                         | 544 (38.7%)                  | 104 (37.5%)                         |
| Middle                                 | 364 (30.7%)                  | 171 (34.5%)                         | 431 (30.7%)                  | 104 (37.5%)                         |
| High                                   | 364 (30.7%)                  | 136 (27.4%)                         | 431 (30.7%)                  | 69 (24.9%)                          |
| <b>BMI category</b>                    |                              | P=0.008                             |                              | P<0.001                             |
| Underweight                            | 50 (5.7%)                    | 25 (7.2%)                           | 58 (5.6%)                    | 17 (9.0%)                           |
| Normal weight                          | 294 (33.6%)                  | 146 (42.3%)                         | 351 (34.0%)                  | 89 (47.3%)                          |
| Overweight                             | 229 (26.2%)                  | 84 (24.3%)                          | 269 (26.1%)                  | 44 (23.4%)                          |
| Obese                                  | 301 (34.4%)                  | 90 (26.1%)                          | 353 (34.2%)                  | 38 (20.2%)                          |
| <b>Distance to nearest clinic (km)</b> |                              | P=0.22                              |                              | P=0.50                              |
| 0–<1.5                                 | 263 (21.9%)                  | 121 (23.9%)                         | 320 (22.5%)                  | 64 (22.5%)                          |
| 1.5–2.5                                | 269 (22.4%)                  | 127 (25.1%)                         | 323 (22.7%)                  | 73 (25.7%)                          |
| >2.5–3.9                               | 310 (25.9%)                  | 131 (25.9%)                         | 365 (25.7%)                  | 76 (26.8%)                          |
| >3.9                                   | 357 (29.8%)                  | 127 (25.1%)                         | 413 (29.1%)                  | 71 (25.0%)                          |

<sup>1</sup>P-value from Chi-squared test comparing individuals who participated in 2011–2012 (N=1199) with those who did not (N=507). <sup>2</sup>P-value from Chi-squared test comparing individuals who participated in 2011–2015 (N=1421) with those who did not (N=285).

**Supplementary Table 3.** Factors<sup>1</sup> associated with linkage to hypertension care within 2 years after home-based diagnosis of hypertension<sup>2</sup> in 2010, among individuals who were previously undiagnosed and participated in 2011 or 2012 (N=1199), using inverse probability weighting to account for non-participation in the blood pressure screen

|                                            | Linked to care/N (%) | Crude OR (95% CI) <sup>3</sup> | Age- & sex-adjusted OR (95% CI) <sup>3</sup> | Adjusted OR (95% CI) <sup>3,4</sup> |
|--------------------------------------------|----------------------|--------------------------------|----------------------------------------------|-------------------------------------|
| <b>Sociodemographic factors</b>            |                      |                                |                                              |                                     |
| <b>Age group</b>                           |                      | P<0.001                        | P<0.001                                      | P<0.001                             |
| <30                                        | 10 / 193 (5.2 %)     | 1                              | 1                                            | 1                                   |
| 35-44                                      | 40 / 242 (16.5%)     | 3.82 (1.85 -7.87 )             | 3.20 (1.55 -6.62 )                           | 3.26 (1.54 -6.90 )                  |
| 45-59                                      | 126 / 360 (35.0%)    | 10.35 (5.28 -20.32)            | 8.64 (4.39 -16.99)                           | 9.35 (4.73 -18.46)                  |
| 60+                                        | 167 / 404 (41.3%)    | 13.75 (7.05 -26.81)            | 12.27 (6.29 -23.91)                          | 13.48 (6.82 -26.61)                 |
| <b>Sex</b>                                 |                      | P<0.001                        | P<0.001                                      | P<0.001                             |
| Male                                       | 47 / 308 (15.3%)     | 1                              | 1                                            | 1                                   |
| Female                                     | 296 / 891 (33.2%)    | 2.86 (2.03 -4.03 )             | 2.57 (1.81 -3.66 )                           | 2.77 (1.91 -4.00 )                  |
| <b>Marital status</b>                      |                      | P<0.001                        | P=0.09                                       | P=0.09                              |
| Single (never married)                     | 55 / 250 (22.0%)     | 1                              | 1                                            | 1                                   |
| Married/informal union                     | 178 / 666 (26.7%)    | 1.35 (0.95 -1.91 )             | 1.35 (0.91 -1.99 )                           | 1.36 (0.92 -2.01 )                  |
| Widow/sep/divorced                         | 110 / 283 (38.9%)    | 2.40 (1.63 -3.54 )             | 0.94 (0.61 -1.44 )                           | 0.95 (0.61 -1.45 )                  |
| <b>Education</b>                           |                      | P<0.001                        | P=0.86                                       | P=0.89                              |
| None                                       | 132 / 363 (36.4%)    | 1                              | 1                                            | 1                                   |
| Less than complete secondary               | 160 / 581 (27.5%)    | 0.64 (0.48 -0.84 )             | 1.09 (0.80 -1.49 )                           | 1.07 (0.78 -1.46 )                  |
| Complete secondary/above                   | 51 / 255 (20.0%)     | 0.42 (0.29 -0.61 )             | 1.06 (0.69 -1.63 )                           | 1.10 (0.71 -1.70 )                  |
| <b>Employed</b>                            |                      | P<0.001                        | P=0.01                                       | P=0.01                              |
| Yes                                        | 31 / 178 (17.4%)     | 1                              | 1                                            | 1                                   |
| No                                         | 312 / 1021 (30.6%)   | 2.21 (1.46 -3.34 )             | 1.74 (1.13 -2.69 )                           | 1.76 (1.14 -2.72 )                  |
| <b>SES tertile</b>                         |                      | P=0.36                         | P=0.32                                       | P=0.26                              |
| Low                                        | 125 / 459 (27.2%)    | 1                              | 1                                            | 1                                   |
| Middle                                     | 99 / 364 (27.2%)     | 1.01 (0.74 -1.38 )             | 1.11 (0.79 -1.55 )                           | 1.12 (0.81 -1.57 )                  |
| High                                       | 115 / 364 (31.6%)    | 1.23 (0.90 -1.66 )             | 1.28 (0.93 -1.77 )                           | 1.31 (0.95 -1.82 )                  |
| <b>Location factors</b>                    |                      |                                |                                              |                                     |
| <b>Residence</b>                           |                      | P=0.03                         | P=0.40                                       | P=0.68                              |
| Urban                                      | 10 / 36 (27.8%)      | 1                              | 1                                            | 1                                   |
| Peri-urban                                 | 95 / 398 (23.9%)     | 0.91 (0.42 -1.96 )             | 0.84 (0.37 -1.89 )                           | 0.73 (0.32 -1.67 )                  |
| Rural                                      | 238 / 765 (31.1%)    | 1.32 (0.62 -2.79 )             | 1.03 (0.47 -2.27 )                           | 0.69 (0.30 -1.59 )                  |
| <b>Nearest clinic (km)<sup>5</sup></b>     |                      |                                |                                              |                                     |
| 0- <1.5                                    | 56 / 263 (21.3%)     |                                |                                              |                                     |
| 1.5-2.5                                    | 71 / 269 (26.4%)     | P<0.001                        | P=0.001                                      | P=0.002                             |
| >2.5-3.9                                   | 93 / 310 (30.0%)     | 1.15 (1.08 -1.23) <sup>6</sup> | 1.13 (1.05 -1.21) <sup>6</sup>               | 1.12 (1.04 -1.20) <sup>6</sup>      |
| >3.9                                       | 123 / 357 (34.5%)    |                                |                                              |                                     |
| <b>Clinical factors</b>                    |                      |                                |                                              |                                     |
| <b>BMI category</b>                        |                      | P<0.001                        | P=0.06                                       | P=0.14                              |
| <25 kg/m <sup>2</sup>                      | 70 / 344 (20.3%)     | 1                              | 1                                            | 1                                   |
| 25 – <30 kg/m <sup>2</sup>                 | 62 / 229 (27.1%)     | 1.56 (1.05 -2.33 )             | 1.13 (0.73 -1.74 )                           | 1.19 (0.77 -1.84 )                  |
| ≥30 kg/m <sup>2</sup>                      | 110 / 301 (36.5%)    | 2.42 (1.69 -3.45 )             | 1.57 (1.05 -2.34 )                           | 1.51 (1.00 -2.28 )                  |
| <b>Hypertension stage<sup>7</sup></b>      |                      | P<0.001                        | P<0.001                                      | P<0.001                             |
| Stage I                                    | 142 / 730 (19.5%)    | 1                              | 1                                            | 1                                   |
| Stage II                                   | 134 / 342 (39.2%)    | 2.72 (2.04 -3.63 )             | 2.20 (1.62 -2.99 )                           | 2.15 (1.58 -2.93 )                  |
| Hypertension urgency                       | 67 / 127 (52.8%)     | 4.79 (3.22 -7.13 )             | 3.14 (2.06 -4.78 )                           | 3.10 (2.04 -4.71 )                  |
| <b>Self-report of diabetes<sup>8</sup></b> |                      | P=0.28                         | P=0.50                                       | P=0.56                              |
| No                                         | 339 / 1191 (28.5%)   | 1                              | 1                                            | 1                                   |
| Yes                                        | 4 / 8 (50.0%)        | 2.16 (0.53 -8.83 )             | 1.56 (0.43 -5.65 )                           | 1.48 (0.40 -5.52 )                  |

| Self-report of TB <sup>8</sup> |                    | P=0.81             | P=0.77             | P=0.48             |
|--------------------------------|--------------------|--------------------|--------------------|--------------------|
| No                             | 332 / 1156 (28.7%) | 1                  | 1                  | 1                  |
| Yes                            | 11 / 43 (25.6%)    | 0.92 (0.45 -1.86 ) | 1.12 (0.51 -2.49 ) | 1.34 (0.59 -3.04 ) |

<sup>1</sup>All characteristics are based on 2010 survey. <sup>2</sup>Hypertension defined as systolic BP  $\geq$  140mmHg or diastolic BP  $\geq$ 90 mmHg, in an average of 2 readings. <sup>3</sup>Weighted for non-response; weights calculated as the inverse probability of survey participation, in strata defined by age group, sex, education level and place of residence.

<sup>4</sup>Sociodemographic factors adjusted for age group, sex, marital status and employment. Location factors adjusted for age group, sex, marital status, employment, and distance from nearest clinic as continuous covariate. Clinical factors adjusted for age group, sex, marital status, employment, distance from nearest clinic, and hypertension stage. <sup>5</sup>Quartiles based on distribution in all individuals who were eligible for 2010 survey. Fit as continuous covariate; n (%) linked in each distance quartile shown for information only. <sup>6</sup>OR for linear trend in linkage with each 1 km increase in distance. <sup>7</sup>Stage I: Systolic BP 140–159 or diastolic BP 90–99; Stage II: Systolic BP 160–179 or diastolic BP 100–119; Hypertension urgency: Systolic BP  $\geq$ 180 or diastolic BP  $\geq$ 120. <sup>8</sup>Reports being diagnosed in the past 12m or currently on treatment.

**Supplementary Table 4.** Factors<sup>1</sup> associated with linkage to hypertension care within 5 years (2011 to 2015) after home-based diagnosis of hypertension<sup>2</sup> in 2010, among individuals who were previously undiagnosed and participated in a subsequent survey (N=1421) using inverse probability weighting to account for non-participation in the blood pressure screen

|                                            | Linked to care/N (%) | Crude OR (95% CI) <sup>3</sup> | Age- & sex-adjusted OR (95% CI) <sup>3</sup> | Adjusted OR (95% CI) <sup>3,4</sup> |
|--------------------------------------------|----------------------|--------------------------------|----------------------------------------------|-------------------------------------|
| <b>Sociodemographic factors</b>            |                      |                                |                                              |                                     |
| <b>Age group</b>                           |                      | P<0.001                        | P<0.001                                      | P<0.001                             |
| <30                                        | 25 / 248 (10.1%)     | 1                              | 1                                            | 1                                   |
| 35-44                                      | 75 / 284 (26.4%)     | 3.22 (1.97 -5.29)              | 2.69 (1.64 -4.43)                            | 2.93 (1.77 -4.87)                   |
| 45-59                                      | 211 / 430 (49.1%)    | 8.67 (5.48 -13.70)             | 7.50 (4.73 -11.89)                           | 8.05 (5.05 -12.84)                  |
| 60+                                        | 265 / 459 (57.7%)    | 12.37 (7.84 -19.53)            | 11.65 (7.35 -18.47)                          | 11.49 (7.25 -18.22)                 |
| <b>Sex</b>                                 |                      | P<0.001                        | P<0.001                                      | P<0.001                             |
| Male                                       | 92 / 394 (23.4%)     | 1                              | 1                                            | 1                                   |
| Female                                     | 484 / 1027 (47.1%)   | 3.06 (2.35 -3.99)              | 2.98 (2.25 -3.94)                            | 2.85 (2.15 -3.79)                   |
| <b>Marital status</b>                      |                      | P<0.001                        | P=0.66                                       | P=0.64                              |
| Single (never married)                     | 98 / 287 (34.1%)     | 1                              | 1                                            | 1                                   |
| Married/informal union                     | 298 / 817 (36.5%)    | 1.16 (0.88 -1.55)              | 1.04 (0.76 -1.44)                            | 1.07 (0.77 -1.48)                   |
| Widow/sep/divorced                         | 180 / 317 (56.8%)    | 2.78 (1.99 -3.87)              | 0.90 (0.61 -1.32)                            | 0.92 (0.62 -1.35)                   |
| <b>Education</b>                           |                      | P<0.001                        | P=0.55                                       | P=0.66                              |
| None                                       | 217 / 424 (51.2%)    | 1                              | 1                                            | 1                                   |
| Less than complete secondary               | 269 / 678 (39.7%)    | 0.60 (0.47 -0.76)              | 1.13 (0.85 -1.50)                            | 1.13 (0.86 -1.50)                   |
| Complete secondary/above                   | 90 / 319 (28.2%)     | 0.36 (0.26 -0.49)              | 0.98 (0.68 -1.41)                            | 1.05 (0.73 -1.53)                   |
| <b>Employed</b>                            |                      | P<0.001                        | P=0.007                                      | P=0.007                             |
| Yes                                        | 61 / 220 (27.7%)     | 1                              | 1                                            | 1                                   |
| No                                         | 515 / 1201 (42.9%)   | 2.04 (1.48 -2.81)              | 1.62 (1.14 -2.29)                            | 1.62 (1.14 -2.29)                   |
| <b>SES tertile</b>                         |                      | P=0.49                         | P=0.71                                       | P=0.58                              |
| Low                                        | 224 / 544 (41.2%)    | 1                              | 1                                            | 1                                   |
| Middle                                     | 163 / 431 (37.8%)    | 0.89 (0.68 -1.15)              | 0.95 (0.71 -1.27)                            | 0.97 (0.73 -1.30)                   |
| High                                       | 183 / 431 (42.5%)    | 1.04 (0.80 -1.35)              | 1.08 (0.81 -1.43)                            | 1.13 (0.85 -1.50)                   |
| <b>Location factors</b>                    |                      |                                |                                              |                                     |
| <b>Residence</b>                           |                      | P=0.07                         | P=0.89                                       | P=0.61                              |
| Urban                                      | 18 / 48 (37.5%)      | 1                              | 1                                            | 1                                   |
| Peri-urban                                 | 173 / 470 (36.8%)    | 1.03 (0.56 -1.92)              | 0.95 (0.50 -1.79)                            | 0.84 (0.44 -1.62)                   |
| Rural                                      | 385 / 903 (42.6%)    | 1.34 (0.73 -2.46)              | 1.01 (0.54 -1.88)                            | 0.75 (0.39 -1.46)                   |
| <b>Nearest clinic (km)<sup>5</sup></b>     |                      |                                |                                              |                                     |
| 0- <1.5                                    | 111 / 320 (34.7%)    |                                |                                              |                                     |
| 1.5-2.5                                    | 128 / 323 (39.6%)    | P=0.001                        | P=0.03                                       | P=0.05                              |
| >2.5-3.9                                   | 147 / 365 (40.3%)    | 1.10 (1.04 -1.17) <sup>6</sup> | 1.08 (1.01 -1.15) <sup>6</sup>               | 1.07 (1.00 -1.14) <sup>6</sup>      |
| >3.9                                       | 190 / 413 (46.0%)    |                                |                                              |                                     |
| <b>BMI category</b>                        |                      | P<0.001                        | P=0.004                                      | P=0.008                             |
| <25 kg/m <sup>2</sup>                      | 133 / 409 (32.5%)    | 1                              | 1                                            | 1                                   |
| 25 – <30 kg/m <sup>2</sup>                 | 99 / 269 (36.8%)     | 1.28 (0.92 -1.77)              | 0.88 (0.61 -1.26)                            | 0.90 (0.62 -1.31)                   |
| ≥30 kg/m <sup>2</sup>                      | 186 / 353 (52.7%)    | 2.44 (1.81 -3.29)              | 1.55 (1.10 -2.18)                            | 1.53 (1.08 -2.17)                   |
| <b>Hypertension stage<sup>7</sup></b>      |                      | P<0.001                        | P<0.001                                      | P<0.001                             |
| Stage I                                    | 264 / 863 (30.6%)    | 1                              | 1                                            | 1                                   |
| Stage II                                   | 215 / 415 (51.8%)    | 2.49 (1.95 -3.17)              | 2.01 (1.54 -2.62)                            | 2.12 (1.55 -2.89)                   |
| Hypertension urgency                       | 97 / 143 (67.8%)     | 5.02 (3.42 -7.37)              | 3.18 (2.10 -4.82)                            | 3.29 (2.01 -5.39)                   |
| <b>Self-report of diabetes<sup>8</sup></b> |                      | P=0.05                         | P=0.08                                       | P=0.32                              |
| No                                         | 568 / 1410 (40.3%)   | 1                              | 1                                            | 1                                   |
| Yes                                        | 8 / 11 (72.7%)       | 3.84 (0.98 -15.03)             | 3.09 (0.88 -10.81)                           | 5.18 (0.21 -128.15)                 |

| Self-report of TB <sup>8</sup> |                    | P=0.73             | P=0.86             | P=0.30             |
|--------------------------------|--------------------|--------------------|--------------------|--------------------|
| No                             | 560 / 1376 (40.7%) | 1                  | 1                  | 1                  |
| Yes                            | 16 / 45 (35.6%)    | 0.89 (0.48 -1.68 ) | 1.07 (0.49 -2.33 ) | 1.57 (0.67 -3.71 ) |

<sup>1</sup>All characteristics are based on 2010 survey. <sup>2</sup>Hypertension defined as systolic BP  $\geq$  140mmHg or diastolic BP  $\geq$ 90 mmHg, in an average of 2 readings. <sup>3</sup>Weighted for non-response; weights calculated as the inverse probability of survey participation, in strata defined by age group, sex, education level and place of residence.

<sup>4</sup>Sociodemographic factors adjusted for age group, sex, and employment. Location factors adjusted for age group, sex, employment, and distance from nearest clinic as continuous covariate. Clinical factors adjusted for age group, sex, employment, distance from nearest clinic, hypertension stage, and BMI. <sup>5</sup>Quartiles based on distribution in all individuals who were eligible for 2010 survey. Fit as continuous covariate; n (%) linked in each distance quartile shown for information only. <sup>6</sup>OR for linear trend in linkage with each 1 km increase in distance. <sup>7</sup>Stage I: Systolic BP 140–159 or diastolic BP 90–99; Stage II: Systolic BP 160–179 or diastolic BP 100–119; Hypertension urgency: Systolic BP  $\geq$ 180 or diastolic BP  $\geq$ 120. <sup>8</sup>Reports being diagnosed in the past 12m or currently on treatment.

For peer review only

**Supplementary Table 5.** Factors<sup>1</sup> associated with linkage to hypertension care within 5 years (2011 to 2015) after home-based diagnosis of hypertension<sup>2</sup> in 2010, among individuals who were previously undiagnosed and participated in a subsequent survey (N=1421)

|                                        | Linked to care/N (%) | Crude OR (95% CI) <sup>3</sup>  | Adjusted OR (95% CI) <sup>3,4</sup> | Adjusted OR (95% CI) <sup>3,5</sup> |
|----------------------------------------|----------------------|---------------------------------|-------------------------------------|-------------------------------------|
| <b>Sociodemographic factors</b>        |                      |                                 |                                     |                                     |
| <b>Age group</b>                       |                      | P<0.001                         | P<0.001                             | P<0.001                             |
| <30                                    | 25 / 248 (10.1%)     | 1                               | 1                                   | 1                                   |
| 35-44                                  | 75 / 284 (26.4%)     | 3.22 (1.97 -5.29 )              | 2.43 (1.47 -4.01 )                  | 2.61 (1.56 -4.34 )                  |
| 45-59                                  | 211 / 430 (49.1%)    | 8.67 (5.48 -13.70)              | 6.58 (4.13 -10.47)                  | 6.96 (4.35 -11.14)                  |
| 60+                                    | 265 / 459 (57.7%)    | 12.37 (7.84 -19.53)             | 10.23 (6.44 -16.25)                 | 10.11 (6.37 -16.06)                 |
| <b>Sex</b>                             |                      | P<0.001                         | P<0.001                             | P<0.001                             |
| Male                                   | 92 / 394 (23.4%)     | 1                               | 1                                   | 1                                   |
| Female                                 | 484 / 1027 (47.1%)   | 3.06 (2.35 -3.99 )              | 2.54 (1.91 -3.39 )                  | 2.46 (1.84 -3.30 )                  |
| <b>Times participated</b>              |                      |                                 |                                     |                                     |
| Once                                   | 61 / 321 (19.0%)     |                                 |                                     |                                     |
| Twice                                  | 119 / 335 (35.5%)    | P<0.001                         | P<0.001                             | P<0.001                             |
| 3 times                                | 160 / 327 (48.9%)    | 1.57 (1.44 -1.71 ) <sup>6</sup> | 1.40 (1.27 -1.53 ) <sup>6</sup>     | 1.39 (1.26 -1.52 ) <sup>6</sup>     |
| 4 times                                | 147 / 287 (51.2%)    |                                 |                                     |                                     |
| 5 times                                | 89 / 151 (58.9%)     |                                 |                                     |                                     |
| <b>Marital status</b>                  |                      | P<0.001                         | P=0.60                              | P=0.55                              |
| Single (never married)                 | 98 / 287 (34.1%)     | 1                               | 1                                   | 1                                   |
| Married/informal union                 | 298 / 817 (36.5%)    | 1.16 (0.88 -1.55 )              | 1.14 (0.82 -1.60 )                  | 1.16 (0.83 -1.63 )                  |
| Widow/sep/divorced                     | 180 / 317 (56.8%)    | 2.78 (1.99 -3.87 )              | 1.00 (0.67 -1.48 )                  | 1.01 (0.68 -1.50 )                  |
| <b>Education</b>                       |                      | P<0.001                         | P=0.74                              | P=0.67                              |
| None                                   | 217 / 424 (51.2%)    | 1                               | 1                                   | 1                                   |
| Less than complete secondary           | 269 / 678 (39.7%)    | 0.60 (0.47 -0.76 )              | 1.12 (0.84 -1.49 )                  | 1.12 (0.84 -1.50 )                  |
| Complete secondary/above               | 90 / 319 (28.2%)     | 0.36 (0.26 -0.49 )              | 1.09 (0.75 -1.59 )                  | 1.16 (0.79 -1.69 )                  |
| <b>Employed</b>                        |                      | P<0.001                         | P=0.03                              | P=0.03                              |
| Yes                                    | 61 / 220 (27.7%)     | 1                               | 1                                   | 1                                   |
| No                                     | 515 / 1201 (42.9%)   | 2.04 (1.48 -2.81 )              | 1.48 (1.04 -2.10 )                  | 1.48 (1.04 -2.10 )                  |
| <b>SES tertile</b>                     |                      | P=0.49                          | P=0.68                              | P=0.56                              |
| Low                                    | 224 / 544 (41.2%)    | 1                               | 1                                   | 1                                   |
| Middle                                 | 163 / 431 (37.8%)    | 0.89 (0.68 -1.15 )              | 0.98 (0.73 -1.32 )                  | 1.00 (0.74 -1.35 )                  |
| High                                   | 183 / 431 (42.5%)    | 1.04 (0.80 -1.35 )              | 1.11 (0.83 -1.48 )                  | 1.15 (0.86 -1.54 )                  |
| <b>Location factors</b>                |                      |                                 |                                     |                                     |
| <b>Residence</b>                       |                      | P=0.07                          | P=0.63                              | P=0.61                              |
| Urban                                  | 18 / 48 (37.5%)      | 1                               | 1                                   | 1                                   |
| Peri-urban                             | 173 / 470 (36.8%)    | 1.03 (0.56 -1.92 )              | 0.82 (0.43 -1.57 )                  | 0.76 (0.40 -1.48 )                  |
| Rural                                  | 385 / 903 (42.6%)    | 1.34 (0.73 -2.46 )              | 0.93 (0.49 -1.74 )                  | 0.85 (0.45 -1.61 )                  |
| <b>Nearest clinic (km)<sup>7</sup></b> |                      |                                 |                                     |                                     |
| 0- <1.5                                | 111 / 320 (34.7%)    |                                 |                                     |                                     |
| 1.5-2.5                                | 128 / 323 (39.6%)    | P=0.001                         | P=0.06                              | P=0.10                              |
| >2.5-3.9                               | 147 / 365 (40.3%)    | 1.10 (1.04 -1.17 ) <sup>8</sup> | 1.07 (1.00 -1.14 ) <sup>8</sup>     | 1.06 (0.99 -1.13 ) <sup>8</sup>     |
| >3.9                                   | 190 / 413 (46.0%)    |                                 |                                     |                                     |
| <b>BMI category</b>                    |                      | P<0.001                         | P=0.003                             | P=0.007                             |
| <25 kg/m <sup>2</sup>                  | 133 / 409 (32.5%)    | 1                               | 1                                   | 1                                   |
| 25 – <30 kg/m <sup>2</sup>             | 99 / 269 (36.8%)     | 1.28 (0.92 -1.77 )              | 0.88 (0.61 -1.28 )                  | 0.89 (0.61 -1.30 )                  |
| ≥30 kg/m <sup>2</sup>                  | 186 / 353 (52.7%)    | 2.44 (1.81 -3.29 )              | 1.58 (1.11 -2.25 )                  | 1.54 (1.07 -2.22 )                  |
| <b>Hypertension stage<sup>9</sup></b>  |                      | P<0.001                         | P<0.001                             | P<0.001                             |
| Stage I                                | 264 / 863 (30.6%)    | 1                               | 1                                   | 1                                   |
| Stage II                               | 215 / 415 (51.8%)    | 2.49 (1.95 -3.17 )              | 2.19 (1.67 -2.88 )                  | 2.36 (1.71 -3.26 )                  |
| Hypertension urgency                   | 97 / 143 (67.8%)     | 5.02 (3.42 -7.37 )              | 3.44 (2.25 -5.25 )                  | 3.74 (2.25 -6.20 )                  |



|                                             |                    |                    |                    |                     |
|---------------------------------------------|--------------------|--------------------|--------------------|---------------------|
| <b>Self-report of diabetes<sup>10</sup></b> |                    | P=0.05             | P=0.03             | P=0.28              |
| No                                          | 568 / 1410 (40.3%) | 1                  | 1                  | 1                   |
| Yes                                         | 8 / 11 (72.7%)     | 3.84 (0.98 -15.03) | 3.67 (1.14 -11.80) | 5.64 (0.25 -126.50) |
| <b>Self-report of TB<sup>10</sup></b>       |                    | P=0.73             | P=0.91             | P=0.56              |
| No                                          | 560 / 1376 (40.7%) | 1                  | 1                  | 1                   |
| Yes                                         | 16 / 45 (35.6%)    | 0.89 (0.48 -1.68 ) | 0.96 (0.43 -2.13 ) | 1.31 (0.52 -3.27 )  |

<sup>1</sup>All characteristics are based on 2010 survey. <sup>2</sup>Hypertension defined as systolic BP  $\geq$  140mmHg or diastolic BP  $\geq$ 90 mmHg, in an average of 2 readings. <sup>3</sup>Weighted for non-response; weights calculated as the inverse probability of survey participation, in strata defined by age group, sex, education level and place of residence. <sup>4</sup>Adjusted for age, sex and number of times participated in subsequent surveys as a continuous covariate. <sup>5</sup>Sociodemographic factors adjusted for age group, sex, number of times in subsequent surveys, and employment. Location factors adjusted for age group, sex, number of times in subsequent surveys, and employment. Clinical factors adjusted for age group, sex, number of times in subsequent surveys, employment, hypertension stage, and BMI. <sup>6</sup>OR for linear trend in reported linkage with each unit increase in survey participation. <sup>7</sup>Quartiles based on distribution in all individuals who were eligible for 2010 survey. Fit as continuous covariate; n (%) linked in each distance quartile shown for information only. <sup>8</sup>OR for linear trend in linkage with each 1 km increase in distance. <sup>9</sup>Stage I: Systolic BP 140–159 or diastolic BP 90–99; Stage II: Systolic BP 160–179 or diastolic BP 100–119; Hypertension urgency: Systolic BP  $\geq$ 180 or diastolic BP  $\geq$ 120. <sup>10</sup>Reports being diagnosed in the past 12m or currently on treatment.

For peer review only

STROBE Statement—Checklist of items that should be included in reports of *cohort studies*

|                          | Item No | Recommendation                                                                                                                                                                       | Page | Comments        |
|--------------------------|---------|--------------------------------------------------------------------------------------------------------------------------------------------------------------------------------------|------|-----------------|
| Title and abstract       | 1       | (a) Indicate the study's design with a commonly used term in the title or the abstract                                                                                               | 1    |                 |
|                          |         | (b) Provide in the abstract an informative and balanced summary of what was done and what was found                                                                                  | 2    |                 |
| <b>Introduction</b>      |         |                                                                                                                                                                                      |      |                 |
| Background/rationale     | 2       | Explain the scientific background and rationale for the investigation being reported                                                                                                 | 4    | Lines 2-23      |
| Objectives               | 3       | State specific objectives, including any prespecified hypotheses                                                                                                                     | 4-5  | Lines 25-32     |
| <b>Methods</b>           |         |                                                                                                                                                                                      |      |                 |
| Study design             | 4       | Present key elements of study design early in the paper                                                                                                                              | 5    | Lines 36-43     |
| Setting                  | 5       | Describe the setting, locations, and relevant dates, including periods of recruitment, exposure, follow-up, and data collection                                                      | 5    | Lines 36-43     |
| Participants             | 6       | (a) Give the eligibility criteria, and the sources and methods of selection of participants. Describe methods of follow-up                                                           | 6    | Lines 70-79     |
|                          |         | (b) For matched studies, give matching criteria and number of exposed and unexposed                                                                                                  | N/A  |                 |
| Variables                | 7       | Clearly define all outcomes, exposures, predictors, potential confounders, and effect modifiers. Give diagnostic criteria, if applicable                                             | 5-6  | Lines 45-67     |
| Data sources/measurement | 8*      | For each variable of interest, give sources of data and details of methods of assessment (measurement). Describe comparability of assessment methods if there is more than one group | 5-6  | Lines 45-67     |
| Bias                     | 9       | Describe any efforts to address potential sources of bias                                                                                                                            | 7    | Lines 94 - 103  |
| Study size               | 10      | Explain how the study size was arrived at                                                                                                                                            | 9    | Lines 129 - 141 |
| Quantitative variables   | 11      | Explain how quantitative variables were handled in the analyses. If applicable, describe which groupings were chosen and why                                                         | 6    | Lines 69 - 79   |
| Statistical methods      | 12      | (a) Describe all statistical methods, including those used to control for confounding                                                                                                | 6-7  | Lines 69 - 103  |
|                          |         | (b) Describe any methods used to examine subgroups and interactions                                                                                                                  | 6    | Lines 73 – 76   |
|                          |         | (c) Explain how missing data were addressed                                                                                                                                          | 7    | Lines 94 - 103  |
|                          |         | (d) If applicable, explain how loss to follow-up was addressed                                                                                                                       | N/A  |                 |
|                          |         | (e) Describe any sensitivity analyses                                                                                                                                                | 7    | Lines 94 - 103  |
| <b>Results</b>           |         |                                                                                                                                                                                      |      |                 |
| Participants             | 13*     | (a) Report numbers of individuals at each stage                                                                                                                                      | 8-9  | Lines 113 - 141 |

|                          |     |                                                                                                                                                                                                              |      |                                                                                                         |
|--------------------------|-----|--------------------------------------------------------------------------------------------------------------------------------------------------------------------------------------------------------------|------|---------------------------------------------------------------------------------------------------------|
|                          |     | of study—eg numbers potentially eligible, examined for eligibility, confirmed eligible, included in the study, completing follow-up, and analysed                                                            |      |                                                                                                         |
|                          |     | (b) Give reasons for non-participation at each stage                                                                                                                                                         | 8-9  | Lines 113 - 141                                                                                         |
|                          |     | (c) Consider use of a flow diagram                                                                                                                                                                           |      | Figure 1                                                                                                |
| Descriptive data         | 14* | (a) Give characteristics of study participants (eg demographic, clinical, social) and information on exposures and potential confounders                                                                     | 9    | Lines 139 - 149                                                                                         |
|                          |     | (b) Indicate number of participants with missing data for each variable of interest                                                                                                                          | N/A  | No data was missing for participants who completed surveys                                              |
|                          |     | (c) Summarise follow-up time (eg, average and total amount)                                                                                                                                                  | 9    | Lines 138 - 149                                                                                         |
| Outcome data             | 15* | Report numbers of outcome events or summary measures over time                                                                                                                                               | 9-10 | Lines 151 - 161                                                                                         |
| Main results             | 16  | (a) Give unadjusted estimates and, if applicable, confounder-adjusted estimates and their precision (eg, 95% confidence interval). Make clear which confounders were adjusted for and why they were included | 10   | Lines 163 - 180                                                                                         |
|                          |     | (b) Report category boundaries when continuous variables were categorized                                                                                                                                    |      | Table 2                                                                                                 |
|                          |     | (c) If relevant, consider translating estimates of relative risk into absolute risk for a meaningful time period                                                                                             | 9-10 | Lines 151 – 161 (we report absolute prevalence of linkage prior to our multivariable model estimations) |
| Other analyses           | 17  | Report other analyses done—eg analyses of subgroups and interactions, and sensitivity analyses                                                                                                               | 10   | Lines 177 – 180, Supplementary Tables                                                                   |
| <b>Discussion</b>        |     |                                                                                                                                                                                                              |      |                                                                                                         |
| Key results              | 18  | Summarise key results with reference to study objectives                                                                                                                                                     | 11   | Lines 183-191                                                                                           |
| Limitations              | 19  | Discuss limitations of the study, taking into account sources of potential bias or imprecision. Discuss both direction and magnitude of any potential bias                                                   | 13   | Lines 240-248                                                                                           |
| Interpretation           | 20  | Give a cautious overall interpretation of results considering objectives, limitations, multiplicity of analyses, results from similar studies, and other relevant evidence                                   | 13   | Lines 150-254                                                                                           |
| Generalisability         | 21  | Discuss the generalisability (external validity) of the study results                                                                                                                                        | 13   | Lines 248-249                                                                                           |
| <b>Other information</b> |     |                                                                                                                                                                                                              |      |                                                                                                         |
| Funding                  | 22  | Give the source of funding and the role of the funders for the present study and, if applicable, for the original study on which the present                                                                 | 1    | Funding statement                                                                                       |

---

article is based

---

\*Give information separately for exposed and unexposed groups.

**Note:** An Explanation and Elaboration article discusses each checklist item and gives methodological background and published examples of transparent reporting. The STROBE checklist is best used in conjunction with this article (freely available on the Web sites of PLoS Medicine at <http://www.plosmedicine.org/>, Annals of Internal Medicine at <http://www.annals.org/>, and Epidemiology at <http://www.epidem.com/>). Information on the STROBE Initiative is available at <http://www.strobe-statement.org>.

For peer review only
