# Supplementary material for: Linkage to primary care after home-based blood pressure screening in rural KwaZulu-Natal, South Africa: a population-based cohort study
Source: PubMed Central journal article supplement (PMC6286496; doi:10.1136/bmjopen-2018-023369), 2018-12-06
Supplement: bmjopen-2018-023369supp001.pdf [file bmjopen-2018-023369supp001.pdf]

**Supplementary Table 1.** Comparison of characteristics between those for whom a blood pressure measurement was taken in the 2010 survey, and those with no blood pressure measurements

|                                 | Eligible for survey <sup>1</sup> | BP measurements | No BP measurement <sup>2</sup> |
|---------------------------------|----------------------------------|-----------------|--------------------------------|
|                                 | N=26,184                         | N=11,694        | N=14,490                       |
| <b>Median (IQR) age (years)</b> | 32 (20–50)                       | 34 (21–53)      | 30 (20–47)                     |
| <b>Age group</b>                |                                  |                 | <b>P&lt;0.001<sup>3</sup></b>  |
| <30                             | 12,164 (46.5%)                   | 5106 (43.7%)    | 7058 (48.7%)                   |
| 35-44                           | 5523 (21.1%)                     | 2194 (18.8%)    | 3329 (23.0%)                   |
| 45-59                           | 4584 (17.5%)                     | 2251 (19.2%)    | 2333 (16.1%)                   |
| 60+                             | 3913 (14.9%)                     | 2143 (18.3%)    | 1770 (12.2%)                   |
| <b>Sex</b>                      |                                  |                 | <b>P&lt;0.001</b>              |
| Male                            | 9959 (38.0%)                     | 3453 (29.5%)    | 6506 (44.9%)                   |
| Female                          | 16,225 (62.0%)                   | 8241 (70.5%)    | 7984 (55.1%)                   |
| <b>Marital status</b>           |                                  |                 | <b>P&lt;0.001</b>              |
| Single (never married)          | 8113 (31.2%)                     | 3462 (29.8%)    | 4651 (32.4%)                   |
| Married/informal union          | 14,959 (57.6%)                   | 6556 (56.3%)    | 8403 (58.6%)                   |
| Widow/sep/divorced              | 2910 (11.2%)                     | 1618 (13.9%)    | 1292 (9.0 %)                   |
| Missing                         | 202                              | 58              | 144                            |
| <b>Education</b>                |                                  |                 | <b>P&lt;0.001</b>              |
| None                            | 4558 (17.5%)                     | 2389 (20.5%)    | 2169 (15.1%)                   |
| Less than complete secondary    | 13,466 (51.6%)                   | 6244 (53.5%)    | 7222 (50.1%)                   |
| Complete secondary/above        | 8051 (30.9%)                     | 3040 (26.0%)    | 5011 (34.8%)                   |
| Missing                         | 109                              | 21              | 88                             |
| <b>Employed</b>                 |                                  |                 | <b>P&lt;0.001</b>              |
| Yes                             | 5860 (22.7%)                     | 1779 (15.3%)    | 4081 (28.6%)                   |
| No                              | 19,997 (77.3%)                   | 9828 (84.7%)    | 10,169 (71.4%)                 |
| Missing                         | 327                              | 87              | 240                            |
| <b>Residence</b>                |                                  |                 | <b>P&lt;0.001</b>              |
| Urban                           | 1953 (7.5 %)                     | 617 (5.3 %)     | 1336 (9.2 %)                   |
| Peri-urban                      | 8084 (30.9%)                     | 3604 (30.8%)    | 4480 (31.0%)                   |
| Rural                           | 16,092 (61.6%)                   | 7464 (63.9%)    | 8628 (59.7%)                   |
| Missing                         | 55                               | 9               | 46                             |
| <b>SES tertile</b>              |                                  |                 | <b>P&lt;0.001</b>              |
| Low                             | 8566 (33.6%)                     | 4193 (36.4%)    | 4373 (31.4%)                   |
| Middle                          | 8330 (32.7%)                     | 3818 (33.1%)    | 4512 (32.4%)                   |
| High                            | 8569 (33.7%)                     | 3522 (30.5%)    | 5047 (36.2%)                   |
| Missing                         | 719                              | 161             | 558                            |

<sup>1</sup>Individuals who were on the eligibility list for the 2010 survey (aged ≥15 years as of Dec 2009 and resident in the DSS), were successfully contacted (92% of all on the list) and still eligible at the time of contact (75% of those contacted). <sup>2</sup>Includes 14,370 individuals who refused consent, and 120 individuals who consented but for whom blood pressure measurements were not available. <sup>3</sup>P-value from Chi-squared test comparing those with blood pressure measurements and those without.

**Supplementary Table 2.** Comparison of characteristics between those who participated in the general health survey in 2011 or 2012 and those who did not, among 1706 individuals with undiagnosed hypertension in 2010

|                                        | Participated in<br>2011/2012<br>N=1199 (70.3%) | Did not participate<br>in 2011/2012<br>N=507 (29.7%) | Participated in<br>2011–2016<br>N=1421 (83.3%) | No participation in<br>later survey<br>N=285 (16.7%) |
|----------------------------------------|------------------------------------------------|------------------------------------------------------|------------------------------------------------|------------------------------------------------------|
| <b>Median (IQR) age (years)</b>        | 50 (38–66)                                     | 43 (29–58)                                           | 50 (37–65)                                     | 41 (28–57)                                           |
| <b>Age group</b>                       |                                                | P<0.001 <sup>1</sup>                                 |                                                | P<0.001 <sup>2</sup>                                 |
| <30                                    | 193 (16.1%)                                    | 140 (27.6%)                                          | 248 (17.5%)                                    | 85 (29.8%)                                           |
| 35-44                                  | 242 (20.2%)                                    | 124 (24.5%)                                          | 284 (20.0%)                                    | 82 (28.8%)                                           |
| 45-59                                  | 360 (30.0%)                                    | 125 (24.7%)                                          | 430 (30.3%)                                    | 55 (19.3%)                                           |
| 60+                                    | 404 (33.7%)                                    | 118 (23.3%)                                          | 459 (32.3%)                                    | 63 (22.1%)                                           |
| <b>Sex</b>                             |                                                | P<0.001                                              |                                                | P<0.001                                              |
| Male                                   | 308 (25.7%)                                    | 234 (46.2%)                                          | 394 (27.7%)                                    | 148 (51.9%)                                          |
| Female                                 | 891 (74.3%)                                    | 273 (53.8%)                                          | 1027 (72.3%)                                   | 137 (48.1%)                                          |
| <b>Marital status</b>                  |                                                | P<0.001                                              |                                                | P<0.001                                              |
| Single (never married)                 | 250 (20.9%)                                    | 94 (18.7%)                                           | 287 (20.2%)                                    | 57 (20.2%)                                           |
| Married/informal union                 | 666 (55.5%)                                    | 342 (67.9%)                                          | 817 (57.5%)                                    | 191 (67.7%)                                          |
| Widow/sep/divorced                     | 283 (23.6%)                                    | 68 (13.5%)                                           | 317 (22.3%)                                    | 34 (12.1%)                                           |
| <b>Education</b>                       |                                                | P<0.001                                              |                                                | P<0.001                                              |
| None                                   | 363 (30.3%)                                    | 119 (23.6%)                                          | 424 (29.8%)                                    | 58 (20.5%)                                           |
| Less than complete<br>secondary        | 581 (48.5%)                                    | 220 (43.6%)                                          | 678 (47.7%)                                    | 123 (43.5%)                                          |
| Complete secondary/above               | 255 (21.3%)                                    | 166 (32.9%)                                          | 319 (22.4%)                                    | 102 (36.0%)                                          |
| <b>Employed</b>                        |                                                | P<0.001                                              |                                                | P<0.001                                              |
| Yes                                    | 178 (14.8%)                                    | 119 (23.6%)                                          | 220 (15.5%)                                    | 77 (27.3%)                                           |
| No                                     | 1021 (85.2%)                                   | 385 (76.4%)                                          | 1201 (84.5%)                                   | 205 (72.7%)                                          |
| <b>Residence</b>                       |                                                | P=0.04                                               |                                                | P=0.16                                               |
| Urban                                  | 36 (3.0%)                                      | 28 (5.5%)                                            | 48 (3.4%)                                      | 16 (5.6%)                                            |
| Peri-urban                             | 398 (33.2%)                                    | 159 (31.4%)                                          | 470 (33.1%)                                    | 87 (30.6%)                                           |
| Rural                                  | 765 (63.8%)                                    | 319 (63.0%)                                          | 903 (63.5%)                                    | 181 (63.7%)                                          |
| <b>SES tertile</b>                     |                                                | P=0.24                                               |                                                | P=0.05                                               |
| Low                                    | 459 (38.7%)                                    | 189 (38.1%)                                          | 544 (38.7%)                                    | 104 (37.5%)                                          |
| Middle                                 | 364 (30.7%)                                    | 171 (34.5%)                                          | 431 (30.7%)                                    | 104 (37.5%)                                          |
| High                                   | 364 (30.7%)                                    | 136 (27.4%)                                          | 431 (30.7%)                                    | 69 (24.9%)                                           |
| <b>BMI category</b>                    |                                                | P=0.008                                              |                                                | P<0.001                                              |
| Underweight                            | 50 (5.7%)                                      | 25 (7.2%)                                            | 58 (5.6%)                                      | 17 (9.0%)                                            |
| Normal weight                          | 294 (33.6%)                                    | 146 (42.3%)                                          | 351 (34.0%)                                    | 89 (47.3%)                                           |
| Overweight                             | 229 (26.2%)                                    | 84 (24.3%)                                           | 269 (26.1%)                                    | 44 (23.4%)                                           |
| Obese                                  | 301 (34.4%)                                    | 90 (26.1%)                                           | 353 (34.2%)                                    | 38 (20.2%)                                           |
| <b>Distance to nearest clinic (km)</b> |                                                | P=0.22                                               |                                                | P=0.50                                               |
| 0- <1.5                                | 263 (21.9%)                                    | 121 (23.9%)                                          | 320 (22.5%)                                    | 64 (22.5%)                                           |
| 1.5-2.5                                | 269 (22.4%)                                    | 127 (25.1%)                                          | 323 (22.7%)                                    | 73 (25.7%)                                           |
| >2.5-3.9                               | 310 (25.9%)                                    | 131 (25.9%)                                          | 365 (25.7%)                                    | 76 (26.8%)                                           |
| >3.9                                   | 357 (29.8%)                                    | 127 (25.1%)                                          | 413 (29.1%)                                    | 71 (25.0%)                                           |

<sup>1</sup>P-value from Chi-squared test comparing individuals who participated in 2011-2012 (N=1199) with those who did not (N=507). <sup>2</sup>P-value from Chi-squared test comparing individuals who participated in 2011-2015 (N=1421) with those who did not (N=285).

**Supplementary Table 3.** Factors<sup>1</sup> associated with linkage to hypertension care within 2 years after home-based diagnosis of hypertension<sup>2</sup> in 2010, among individuals who were previously undiagnosed and participated in 2011 or 2012 (N=1199), using inverse probability weighting to account for non-participation in the blood pressure screen

|                                            | Linked to care/N (%) | Crude OR (95% CI) <sup>3</sup>  | Age- & sex-adjusted OR (95% CI) <sup>3</sup> | Adjusted OR (95% CI) <sup>3,4</sup> |
|--------------------------------------------|----------------------|---------------------------------|----------------------------------------------|-------------------------------------|
| <b>Sociodemographic factors</b>            |                      |                                 |                                              |                                     |
| <b>Age group</b>                           |                      | P<0.001                         | P<0.001                                      | P<0.001                             |
| <30                                        | 10 / 193 (5.2 %)     | 1                               | 1                                            | 1                                   |
| 35-44                                      | 40 / 242 (16.5%)     | 3.82 (1.85 -7.87 )              | 3.20 (1.55 -6.62 )                           | 3.26 (1.54 -6.90 )                  |
| 45-59                                      | 126 / 360 (35.0%)    | 10.35 (5.28 -20.32)             | 8.64 (4.39 -16.99)                           | 9.35 (4.73 -18.46)                  |
| 60+                                        | 167 / 404 (41.3%)    | 13.75 (7.05 -26.81)             | 12.27 (6.29 -23.91)                          | 13.48 (6.82 -26.61)                 |
| <b>Sex</b>                                 |                      | P<0.001                         | P<0.001                                      | P<0.001                             |
| Male                                       | 47 / 308 (15.3%)     | 1                               | 1                                            | 1                                   |
| Female                                     | 296 / 891 (33.2%)    | 2.86 (2.03 -4.03 )              | 2.57 (1.81 -3.66 )                           | 2.77 (1.91 -4.00 )                  |
| <b>Marital status</b>                      |                      | P<0.001                         | P=0.09                                       | P=0.09                              |
| Single (never married)                     | 55 / 250 (22.0%)     | 1                               | 1                                            | 1                                   |
| Married/informal union                     | 178 / 666 (26.7%)    | 1.35 (0.95 -1.91 )              | 1.35 (0.91 -1.99 )                           | 1.36 (0.92 -2.01 )                  |
| Widow/sep/divorced                         | 110 / 283 (38.9%)    | 2.40 (1.63 -3.54 )              | 0.94 (0.61 -1.44 )                           | 0.95 (0.61 -1.45 )                  |
| <b>Education</b>                           |                      | P<0.001                         | P=0.86                                       | P=0.89                              |
| None                                       | 132 / 363 (36.4%)    | 1                               | 1                                            | 1                                   |
| Less than complete secondary               | 160 / 581 (27.5%)    | 0.64 (0.48 -0.84 )              | 1.09 (0.80 -1.49 )                           | 1.07 (0.78 -1.46 )                  |
| Complete secondary/above                   | 51 / 255 (20.0%)     | 0.42 (0.29 -0.61 )              | 1.06 (0.69 -1.63 )                           | 1.10 (0.71 -1.70 )                  |
| <b>Employed</b>                            |                      | P<0.001                         | P=0.01                                       | P=0.01                              |
| Yes                                        | 31 / 178 (17.4%)     | 1                               | 1                                            | 1                                   |
| No                                         | 312 / 1021 (30.6%)   | 2.21 (1.46 -3.34 )              | 1.74 (1.13 -2.69 )                           | 1.76 (1.14 -2.72 )                  |
| <b>SES tertile</b>                         |                      | P=0.36                          | P=0.32                                       | P=0.26                              |
| Low                                        | 125 / 459 (27.2%)    | 1                               | 1                                            | 1                                   |
| Middle                                     | 99 / 364 (27.2%)     | 1.01 (0.74 -1.38 )              | 1.11 (0.79 -1.55 )                           | 1.12 (0.81 -1.57 )                  |
| High                                       | 115 / 364 (31.6%)    | 1.23 (0.90 -1.66 )              | 1.28 (0.93 -1.77 )                           | 1.31 (0.95 -1.82 )                  |
| <b>Location factors</b>                    |                      |                                 |                                              |                                     |
| <b>Residence</b>                           |                      | P=0.03                          | P=0.40                                       | P=0.68                              |
| Urban                                      | 10 / 36 (27.8%)      | 1                               | 1                                            | 1                                   |
| Peri-urban                                 | 95 / 398 (23.9%)     | 0.91 (0.42 -1.96 )              | 0.84 (0.37 -1.89 )                           | 0.73 (0.32 -1.67 )                  |
| Rural                                      | 238 / 765 (31.1%)    | 1.32 (0.62 -2.79 )              | 1.03 (0.47 -2.27 )                           | 0.69 (0.30 -1.59 )                  |
| <b>Nearest clinic (km)<sup>5</sup></b>     |                      |                                 |                                              |                                     |
| 0- <1.5                                    | 56 / 263 (21.3%)     |                                 |                                              |                                     |
| 1.5-2.5                                    | 71 / 269 (26.4%)     | P<0.001                         | P=0.001                                      | P=0.002                             |
| >2.5-3.9                                   | 93 / 310 (30.0%)     | 1.15 (1.08 -1.23 ) <sup>6</sup> | 1.13 (1.05 -1.21 ) <sup>6</sup>              | 1.12 (1.04 -1.20 ) <sup>6</sup>     |
| >3.9                                       | 123 / 357 (34.5%)    |                                 |                                              |                                     |
| <b>Clinical factors</b>                    |                      |                                 |                                              |                                     |
| <b>BMI category</b>                        |                      | P<0.001                         | P=0.06                                       | P=0.14                              |
| <25 kg/m <sup>2</sup>                      | 70 / 344 (20.3%)     | 1                               | 1                                            | 1                                   |
| 25 – <30 kg/m <sup>2</sup>                 | 62 / 229 (27.1%)     | 1.56 (1.05 -2.33 )              | 1.13 (0.73 -1.74 )                           | 1.19 (0.77 -1.84 )                  |
| ≥30 kg/m <sup>2</sup>                      | 110 / 301 (36.5%)    | 2.42 (1.69 -3.45 )              | 1.57 (1.05 -2.34 )                           | 1.51 (1.00 -2.28 )                  |
| <b>Hypertension stage<sup>7</sup></b>      |                      | P<0.001                         | P<0.001                                      | P<0.001                             |
| Stage I                                    | 142 / 730 (19.5%)    | 1                               | 1                                            | 1                                   |
| Stage II                                   | 134 / 342 (39.2%)    | 2.72 (2.04 -3.63 )              | 2.20 (1.62 -2.99 )                           | 2.15 (1.58 -2.93 )                  |
| Hypertension urgency                       | 67 / 127 (52.8%)     | 4.79 (3.22 -7.13 )              | 3.14 (2.06 -4.78 )                           | 3.10 (2.04 -4.71 )                  |
| <b>Self-report of diabetes<sup>8</sup></b> |                      | P=0.28                          | P=0.50                                       | P=0.56                              |
| No                                         | 339 / 1191 (28.5%)   | 1                               | 1                                            | 1                                   |
| Yes                                        | 4 / 8 (50.0%)        | 2.16 (0.53 -8.83 )              | 1.56 (0.43 -5.65 )                           | 1.48 (0.40 -5.52 )                  |

| Self-report of TB <sup>8</sup> |                    | P=0.81             | P=0.77             | P=0.48             |
|--------------------------------|--------------------|--------------------|--------------------|--------------------|
| No                             | 332 / 1156 (28.7%) | 1                  | 1                  | 1                  |
| Yes                            | 11 / 43 (25.6%)    | 0.92 (0.45 -1.86 ) | 1.12 (0.51 -2.49 ) | 1.34 (0.59 -3.04 ) |

<sup>1</sup>All characteristics are based on 2010 survey. <sup>2</sup>Hypertension defined as systolic BP  $\geq$  140mmHg or diastolic BP  $\geq$ 90 mmHg, in an average of 2 readings. <sup>3</sup>Weighted for non-response; weights calculated as the inverse probability of survey participation, in strata defined by age group, sex, education level and place of residence.

<sup>4</sup>Sociodemographic factors adjusted for age group, sex, marital status and employment. Location factors adjusted for age group, sex, marital status, employment, and distance from nearest clinic as continuous covariate. Clinical factors adjusted for age group, sex, marital status, employment, distance from nearest clinic, and hypertension stage. <sup>5</sup>Quartiles based on distribution in all individuals who were eligible for 2010 survey. Fit as continuous covariate; n (%) linked in each distance quartile shown for information only. <sup>6</sup>OR for linear trend in linkage with each 1 km increase in distance. <sup>7</sup>Stage I: Systolic BP 140–159 or diastolic BP 90–99; Stage II: Systolic BP 160–179 or diastolic BP 100–119; Hypertension urgency: Systolic BP  $\geq$ 180 or diastolic BP  $\geq$ 120. <sup>8</sup>Reports being diagnosed in the past 12m or currently on treatment.

**Supplementary Table 4.** Factors<sup>1</sup> associated with linkage to hypertension care within 5 years (2011 to 2015) after home-based diagnosis of hypertension<sup>2</sup> in 2010, among individuals who were previously undiagnosed and participated in a subsequent survey (N=1421) using inverse probability weighting to account for non-participation in the blood pressure screen

|                                            | Linked to care/N (%) | Crude OR (95% CI) <sup>3</sup> | Age- & sex-adjusted OR (95% CI) <sup>3</sup> | Adjusted OR (95% CI) <sup>3,4</sup> |
|--------------------------------------------|----------------------|--------------------------------|----------------------------------------------|-------------------------------------|
| <b>Sociodemographic factors</b>            |                      |                                |                                              |                                     |
| <b>Age group</b>                           |                      | P<0.001                        | P<0.001                                      | P<0.001                             |
| <30                                        | 25 / 248 (10.1%)     | 1                              | 1                                            | 1                                   |
| 35-44                                      | 75 / 284 (26.4%)     | 3.22 (1.97 -5.29 )             | 2.69 (1.64 -4.43 )                           | 2.93 (1.77 -4.87 )                  |
| 45-59                                      | 211 / 430 (49.1%)    | 8.67 (5.48 -13.70)             | 7.50 (4.73 -11.89)                           | 8.05 (5.05 -12.84)                  |
| 60+                                        | 265 / 459 (57.7%)    | 12.37 (7.84 -19.53)            | 11.65 (7.35 -18.47)                          | 11.49 (7.25 -18.22)                 |
| <b>Sex</b>                                 |                      | P<0.001                        | P<0.001                                      | P<0.001                             |
| Male                                       | 92 / 394 (23.4%)     | 1                              | 1                                            | 1                                   |
| Female                                     | 484 / 1027 (47.1%)   | 3.06 (2.35 -3.99 )             | 2.98 (2.25 -3.94 )                           | 2.85 (2.15 -3.79 )                  |
| <b>Marital status</b>                      |                      | P<0.001                        | P=0.66                                       | P=0.64                              |
| Single (never married)                     | 98 / 287 (34.1%)     | 1                              | 1                                            | 1                                   |
| Married/informal union                     | 298 / 817 (36.5%)    | 1.16 (0.88 -1.55 )             | 1.04 (0.76 -1.44 )                           | 1.07 (0.77 -1.48 )                  |
| Widow/sep/divorced                         | 180 / 317 (56.8%)    | 2.78 (1.99 -3.87 )             | 0.90 (0.61 -1.32 )                           | 0.92 (0.62 -1.35 )                  |
| <b>Education</b>                           |                      | P<0.001                        | P=0.55                                       | P=0.66                              |
| None                                       | 217 / 424 (51.2%)    | 1                              | 1                                            | 1                                   |
| Less than complete secondary               | 269 / 678 (39.7%)    | 0.60 (0.47 -0.76 )             | 1.13 (0.85 -1.50 )                           | 1.13 (0.86 -1.50 )                  |
| Complete secondary/above                   | 90 / 319 (28.2%)     | 0.36 (0.26 -0.49 )             | 0.98 (0.68 -1.41 )                           | 1.05 (0.73 -1.53 )                  |
| <b>Employed</b>                            |                      | P<0.001                        | P=0.007                                      | P=0.007                             |
| Yes                                        | 61 / 220 (27.7%)     | 1                              | 1                                            | 1                                   |
| No                                         | 515 / 1201 (42.9%)   | 2.04 (1.48 -2.81 )             | 1.62 (1.14 -2.29 )                           | 1.62 (1.14 -2.29 )                  |
| <b>SES tertile</b>                         |                      | P=0.49                         | P=0.71                                       | P=0.58                              |
| Low                                        | 224 / 544 (41.2%)    | 1                              | 1                                            | 1                                   |
| Middle                                     | 163 / 431 (37.8%)    | 0.89 (0.68 -1.15 )             | 0.95 (0.71 -1.27 )                           | 0.97 (0.73 -1.30 )                  |
| High                                       | 183 / 431 (42.5%)    | 1.04 (0.80 -1.35 )             | 1.08 (0.81 -1.43 )                           | 1.13 (0.85 -1.50 )                  |
| <b>Location factors</b>                    |                      |                                |                                              |                                     |
| <b>Residence</b>                           |                      | P=0.07                         | P=0.89                                       | P=0.61                              |
| Urban                                      | 18 / 48 (37.5%)      | 1                              | 1                                            | 1                                   |
| Peri-urban                                 | 173 / 470 (36.8%)    | 1.03 (0.56 -1.92 )             | 0.95 (0.50 -1.79 )                           | 0.84 (0.44 -1.62 )                  |
| Rural                                      | 385 / 903 (42.6%)    | 1.34 (0.73 -2.46 )             | 1.01 (0.54 -1.88 )                           | 0.75 (0.39 -1.46 )                  |
| <b>Nearest clinic (km)<sup>5</sup></b>     |                      |                                |                                              |                                     |
| 0- <1.5                                    | 111 / 320 (34.7%)    |                                |                                              |                                     |
| 1.5-2.5                                    | 128 / 323 (39.6%)    | P=0.001                        | P=0.03                                       | P=0.05                              |
| >2.5-3.9                                   | 147 / 365 (40.3%)    | 1.10 (1.04 -1.17) <sup>6</sup> | 1.08 (1.01 -1.15) <sup>6</sup>               | 1.07 (1.00 -1.14) <sup>6</sup>      |
| >3.9                                       | 190 / 413 (46.0%)    |                                |                                              |                                     |
| <b>BMI category</b>                        |                      | P<0.001                        | P=0.004                                      | P=0.008                             |
| <25 kg/m <sup>2</sup>                      | 133 / 409 (32.5%)    | 1                              | 1                                            | 1                                   |
| 25 – <30 kg/m <sup>2</sup>                 | 99 / 269 (36.8%)     | 1.28 (0.92 -1.77 )             | 0.88 (0.61 -1.26 )                           | 0.90 (0.62 -1.31 )                  |
| ≥30 kg/m <sup>2</sup>                      | 186 / 353 (52.7%)    | 2.44 (1.81 -3.29 )             | 1.55 (1.10 -2.18 )                           | 1.53 (1.08 -2.17 )                  |
| <b>Hypertension stage<sup>7</sup></b>      |                      | P<0.001                        | P<0.001                                      | P<0.001                             |
| Stage I                                    | 264 / 863 (30.6%)    | 1                              | 1                                            | 1                                   |
| Stage II                                   | 215 / 415 (51.8%)    | 2.49 (1.95 -3.17 )             | 2.01 (1.54 -2.62 )                           | 2.12 (1.55 -2.89 )                  |
| Hypertension urgency                       | 97 / 143 (67.8%)     | 5.02 (3.42 -7.37 )             | 3.18 (2.10 -4.82 )                           | 3.29 (2.01 -5.39 )                  |
| <b>Self-report of diabetes<sup>8</sup></b> |                      | P=0.05                         | P=0.08                                       | P=0.32                              |
| No                                         | 568 / 1410 (40.3%)   | 1                              | 1                                            | 1                                   |
| Yes                                        | 8 / 11 (72.7%)       | 3.84 (0.98 -15.03)             | 3.09 (0.88 -10.81)                           | 5.18 (0.21 -128.15)                 |

| Self-report of TB <sup>8</sup> |                    | P=0.73             | P=0.86             | P=0.30             |
|--------------------------------|--------------------|--------------------|--------------------|--------------------|
| No                             | 560 / 1376 (40.7%) | 1                  | 1                  | 1                  |
| Yes                            | 16 / 45 (35.6%)    | 0.89 (0.48 -1.68 ) | 1.07 (0.49 -2.33 ) | 1.57 (0.67 -3.71 ) |

<sup>1</sup>All characteristics are based on 2010 survey. <sup>2</sup>Hypertension defined as systolic BP  $\geq$  140mmHg or diastolic BP  $\geq$ 90 mmHg, in an average of 2 readings. <sup>3</sup>Weighted for non-response; weights calculated as the inverse probability of survey participation, in strata defined by age group, sex, education level and place of residence.

<sup>4</sup>Sociodemographic factors adjusted for age group, sex, and employment. Location factors adjusted for age group, sex, employment, and distance from nearest clinic as continuous covariate. Clinical factors adjusted for age group, sex, employment, distance from nearest clinic, hypertension stage, and BMI. <sup>5</sup>Quartiles based on distribution in all individuals who were eligible for 2010 survey. Fit as continuous covariate; n (%) linked in each distance quartile shown for information only. <sup>6</sup>OR for linear trend in linkage with each 1 km increase in distance. <sup>7</sup>Stage I: Systolic BP 140–159 or diastolic BP 90–99; Stage II: Systolic BP 160–179 or diastolic BP 100–119; Hypertension urgency: Systolic BP  $\geq$ 180 or diastolic BP  $\geq$ 120. <sup>8</sup>Reports being diagnosed in the past 12m or currently on treatment.

**Supplementary Table 5.** Factors<sup>1</sup> associated with linkage to hypertension care within 5 years (2011 to 2015) after home-based diagnosis of hypertension<sup>2</sup> in 2010, among individuals who were previously undiagnosed and participated in a subsequent survey (N=1421)

|                                        | Linked to care/N (%) | Crude OR (95% CI) <sup>3</sup>  | Adjusted OR (95% CI) <sup>3,4</sup> | Adjusted OR (95% CI) <sup>3,5</sup> |
|----------------------------------------|----------------------|---------------------------------|-------------------------------------|-------------------------------------|
| <b>Sociodemographic factors</b>        |                      |                                 |                                     |                                     |
| <b>Age group</b>                       |                      | P<0.001                         | P<0.001                             | P<0.001                             |
| <30                                    | 25 / 248 (10.1%)     | 1                               | 1                                   | 1                                   |
| 35-44                                  | 75 / 284 (26.4%)     | 3.22 (1.97 -5.29 )              | 2.43 (1.47 -4.01 )                  | 2.61 (1.56 -4.34 )                  |
| 45-59                                  | 211 / 430 (49.1%)    | 8.67 (5.48 -13.70)              | 6.58 (4.13 -10.47)                  | 6.96 (4.35 -11.14)                  |
| 60+                                    | 265 / 459 (57.7%)    | 12.37 (7.84 -19.53)             | 10.23 (6.44 -16.25)                 | 10.11 (6.37 -16.06)                 |
| <b>Sex</b>                             |                      | P<0.001                         | P<0.001                             | P<0.001                             |
| Male                                   | 92 / 394 (23.4%)     | 1                               | 1                                   | 1                                   |
| Female                                 | 484 / 1027 (47.1%)   | 3.06 (2.35 -3.99 )              | 2.54 (1.91 -3.39 )                  | 2.46 (1.84 -3.30 )                  |
| <b>Times participated</b>              |                      |                                 |                                     |                                     |
| Once                                   | 61 / 321 (19.0%)     |                                 |                                     |                                     |
| Twice                                  | 119 / 335 (35.5%)    | P<0.001                         | P<0.001                             | P<0.001                             |
| 3 times                                | 160 / 327 (48.9%)    | 1.57 (1.44 -1.71 ) <sup>6</sup> | 1.40 (1.27 -1.53 ) <sup>6</sup>     | 1.39 (1.26 -1.52 ) <sup>6</sup>     |
| 4 times                                | 147 / 287 (51.2%)    |                                 |                                     |                                     |
| 5 times                                | 89 / 151 (58.9%)     |                                 |                                     |                                     |
| <b>Marital status</b>                  |                      | P<0.001                         | P=0.60                              | P=0.55                              |
| Single (never married)                 | 98 / 287 (34.1%)     | 1                               | 1                                   | 1                                   |
| Married/informal union                 | 298 / 817 (36.5%)    | 1.16 (0.88 -1.55 )              | 1.14 (0.82 -1.60 )                  | 1.16 (0.83 -1.63 )                  |
| Widow/sep/divorced                     | 180 / 317 (56.8%)    | 2.78 (1.99 -3.87 )              | 1.00 (0.67 -1.48 )                  | 1.01 (0.68 -1.50 )                  |
| <b>Education</b>                       |                      | P<0.001                         | P=0.74                              | P=0.67                              |
| None                                   | 217 / 424 (51.2%)    | 1                               | 1                                   | 1                                   |
| Less than complete secondary           | 269 / 678 (39.7%)    | 0.60 (0.47 -0.76 )              | 1.12 (0.84 -1.49 )                  | 1.12 (0.84 -1.50 )                  |
| Complete secondary/above               | 90 / 319 (28.2%)     | 0.36 (0.26 -0.49 )              | 1.09 (0.75 -1.59 )                  | 1.16 (0.79 -1.69 )                  |
| <b>Employed</b>                        |                      | P<0.001                         | P=0.03                              | P=0.03                              |
| Yes                                    | 61 / 220 (27.7%)     | 1                               | 1                                   | 1                                   |
| No                                     | 515 / 1201 (42.9%)   | 2.04 (1.48 -2.81 )              | 1.48 (1.04 -2.10 )                  | 1.48 (1.04 -2.10 )                  |
| <b>SES tertile</b>                     |                      | P=0.49                          | P=0.68                              | P=0.56                              |
| Low                                    | 224 / 544 (41.2%)    | 1                               | 1                                   | 1                                   |
| Middle                                 | 163 / 431 (37.8%)    | 0.89 (0.68 -1.15 )              | 0.98 (0.73 -1.32 )                  | 1.00 (0.74 -1.35 )                  |
| High                                   | 183 / 431 (42.5%)    | 1.04 (0.80 -1.35 )              | 1.11 (0.83 -1.48 )                  | 1.15 (0.86 -1.54 )                  |
| <b>Location factors</b>                |                      |                                 |                                     |                                     |
| <b>Residence</b>                       |                      | P=0.07                          | P=0.63                              | P=0.61                              |
| Urban                                  | 18 / 48 (37.5%)      | 1                               | 1                                   | 1                                   |
| Peri-urban                             | 173 / 470 (36.8%)    | 1.03 (0.56 -1.92 )              | 0.82 (0.43 -1.57 )                  | 0.76 (0.40 -1.48 )                  |
| Rural                                  | 385 / 903 (42.6%)    | 1.34 (0.73 -2.46 )              | 0.93 (0.49 -1.74 )                  | 0.85 (0.45 -1.61 )                  |
| <b>Nearest clinic (km)<sup>7</sup></b> |                      |                                 |                                     |                                     |
| 0- <1.5                                | 111 / 320 (34.7%)    |                                 |                                     |                                     |
| 1.5-2.5                                | 128 / 323 (39.6%)    | P=0.001                         | P=0.06                              | P=0.10                              |
| >2.5-3.9                               | 147 / 365 (40.3%)    | 1.10 (1.04 -1.17 ) <sup>8</sup> | 1.07 (1.00 -1.14 ) <sup>8</sup>     | 1.06 (0.99 -1.13 ) <sup>8</sup>     |
| >3.9                                   | 190 / 413 (46.0%)    |                                 |                                     |                                     |
| <b>BMI category</b>                    |                      | P<0.001                         | P=0.003                             | P=0.007                             |
| <25 kg/m <sup>2</sup>                  | 133 / 409 (32.5%)    | 1                               | 1                                   | 1                                   |
| 25 – <30 kg/m <sup>2</sup>             | 99 / 269 (36.8%)     | 1.28 (0.92 -1.77 )              | 0.88 (0.61 -1.28 )                  | 0.89 (0.61 -1.30 )                  |
| ≥30 kg/m <sup>2</sup>                  | 186 / 353 (52.7%)    | 2.44 (1.81 -3.29 )              | 1.58 (1.11 -2.25 )                  | 1.54 (1.07 -2.22 )                  |
| <b>Hypertension stage<sup>9</sup></b>  |                      | P<0.001                         | P<0.001                             | P<0.001                             |
| Stage I                                | 264 / 863 (30.6%)    | 1                               | 1                                   | 1                                   |
| Stage II                               | 215 / 415 (51.8%)    | 2.49 (1.95 -3.17 )              | 2.19 (1.67 -2.88 )                  | 2.36 (1.71 -3.26 )                  |
| Hypertension urgency                   | 97 / 143 (67.8%)     | 5.02 (3.42 -7.37 )              | 3.44 (2.25 -5.25 )                  | 3.74 (2.25 -6.20 )                  |

|                                             |                    |                    |                    |                     |
|---------------------------------------------|--------------------|--------------------|--------------------|---------------------|
| <b>Self-report of diabetes<sup>10</sup></b> |                    | P=0.05             | P=0.03             | P=0.28              |
| No                                          | 568 / 1410 (40.3%) | 1                  | 1                  | 1                   |
| Yes                                         | 8 / 11 (72.7%)     | 3.84 (0.98 -15.03) | 3.67 (1.14 -11.80) | 5.64 (0.25 -126.50) |
| <b>Self-report of TB<sup>10</sup></b>       |                    | P=0.73             | P=0.91             | P=0.56              |
| No                                          | 560 / 1376 (40.7%) | 1                  | 1                  | 1                   |
| Yes                                         | 16 / 45 (35.6%)    | 0.89 (0.48 -1.68 ) | 0.96 (0.43 -2.13 ) | 1.31 (0.52 -3.27 )  |

<sup>1</sup>All characteristics are based on 2010 survey. <sup>2</sup>Hypertension defined as systolic BP  $\geq$  140mmHg or diastolic BP  $\geq$ 90 mmHg, in an average of 2 readings. <sup>3</sup>Weighted for non-response; weights calculated as the inverse probability of survey participation, in strata defined by age group, sex, education level and place of residence. <sup>4</sup>Adjusted for age, sex and number of times participated in subsequent surveys as a continuous covariate. <sup>5</sup>Sociodemographic factors adjusted for age group, sex, number of times in subsequent surveys, and employment. Location factors adjusted for age group, sex, number of times in subsequent surveys, and employment. Clinical factors adjusted for age group, sex, number of times in subsequent surveys, employment, hypertension stage, and BMI. <sup>6</sup>OR for linear trend in reported linkage with each unit increase in survey participation. <sup>7</sup>Quartiles based on distribution in all individuals who were eligible for 2010 survey. Fit as continuous covariate; n (%) linked in each distance quartile shown for information only. <sup>8</sup>OR for linear trend in linkage with each 1 km increase in distance. <sup>9</sup>Stage I: Systolic BP 140–159 or diastolic BP 90–99; Stage II: Systolic BP 160–179 or diastolic BP 100–119; Hypertension urgency: Systolic BP  $\geq$ 180 or diastolic BP  $\geq$ 120. <sup>10</sup>Reports being diagnosed in the past 12m or currently on treatment.
